# Supplementary material for: Boron-catalyzed α-C–H fluorination of aryl acetic acids
Source: Royal Society of Chemistry journal article supplement (doi:10.1039/d1qo01814k), 2022-01-01

## **Boron-Catalyzed $\alpha$ -C-H Fluorination of Aryl Acetic Acids**

Haipeng Hu,<sup>\*a</sup> Cuilin Wang,<sup>b</sup> Xin Wu,<sup>b</sup> Yangu Liu,<sup>a</sup> Guizhou Yue,<sup>a</sup> Gehong Su,<sup>a</sup> Juhua Feng<sup>a</sup>

<sup>a</sup>College of Science Sichuan Agricultural University, Ya'an, Sichuan, 625014 (P. R. China)

<sup>b</sup>Sichuan Normal University, Chengdu 610068, (P. R. China).

E-mail: chemhhp@yeah.net.

## Content

|                                                                                                       |    |
|-------------------------------------------------------------------------------------------------------|----|
| 1. General Information.....                                                                           | 3  |
| 2. Optimization of Reaction Conditions. ....                                                          | 4  |
| 3. General Procedure for the Catalytic $\alpha$ -Fluorination Reaction of Free Carboxylic acids. .... | 8  |
| 4. Gram-Scale Synthesis. ....                                                                         | 8  |
| 5. Failed Examples.....                                                                               | 9  |
| 6. The X-ray Structure of Product 4b.....                                                             | 9  |
| 7. Characterization of the Products.....                                                              | 11 |
| 8. Reference .....                                                                                    | 23 |
| 9. Copy of $^1\text{H}$ , $^{13}\text{C}\{^1\text{H}\}$ and $^{19}\text{F}$ NMR Spectra.....          | 25 |

## 1. General Information

Unless otherwise noted, all the reactions were performed under nitrogen atmosphere in the glove box. The solvents (THF, toluene and CH<sub>2</sub>Cl<sub>2</sub>) were dried according to the standard procedures. <sup>1</sup>H NMR spectra were recorded on a Bruker DRX400 (400 MHz), Bruker DRX600 (600 MHz) by using CDCl<sub>3</sub> as solvent. Chemical shifts (δ) values were reported in ppm from tetramethylsilane with the solvent resonance as the internal standard. Spectra were reported as follows: chemical shift (δ ppm), multiplicity (s = singlet, d = doublet, t = triplet, q = quartet, m = multiplet), coupling constants (Hz), integration and assignment. <sup>13</sup>C{<sup>1</sup>H} NMR spectra were collected on commercial instruments (150 MHz) with complete proton decoupling. Chemical shifts are reported in ppm from the tetramethylsilane with the solvent resonance as internal standard (CDCl<sub>3</sub>, δ = 77.0). <sup>19</sup>F NMR spectra were collected at 565 MHz. HRMS was recorded on a commercial apparatus (ESI Source). The aryl acetic acids **2a-9a**, **11a-24a**, **30a-34a**, **39a-42a** and boron catalysts (PhB(OH)<sub>2</sub>, B(OH)<sub>3</sub>, C<sub>6</sub>F<sub>5</sub>B(OH)<sub>2</sub>, B<sub>2</sub>pin<sub>2</sub>) were commercially available. Carboxylic acids **1a**,<sup>1</sup> **10a**,<sup>1</sup> **25a-29a**,<sup>2-6</sup> (AcO)<sub>4</sub>B<sub>2</sub>O<sup>7</sup> were prepared according to reported procedures.

## 2. Optimization of Reaction Conditions.

Table S1. The screening of catalyst and [F] sources.

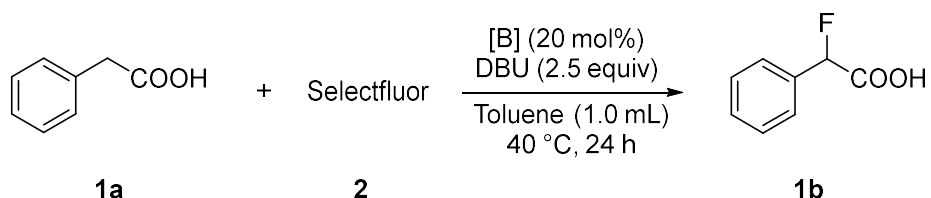

| Entry <sup>[a]</sup> | Catalyst                                         | Base | Yield <sup>[b]</sup> (%) |
|----------------------|--------------------------------------------------|------|--------------------------|
| 1                    | (AcO) <sub>4</sub> B <sub>2</sub> O              | DBU  | 88                       |
| 2                    | PhB(OH) <sub>2</sub>                             | DBU  | 64                       |
| 3                    | B(OH) <sub>3</sub>                               | DBU  | 74                       |
| 4                    | C <sub>6</sub> F <sub>5</sub> B(OH) <sub>2</sub> | DBU  | 66                       |
| 5                    | B <sub>2</sub> pin <sub>2</sub>                  | DBU  | 60                       |
| 6 <sup>[c]</sup>     | (AcO) <sub>4</sub> B <sub>2</sub> O              | DBU  | 22                       |

[a] All the reactions were performed with **1a** (0.10 mmol), **2** (0.10 mmol), [B] (20 mol%), DBU (2.5 equiv) in toluene (1.0 mL) at 40 °C under N<sub>2</sub> atmosphere for 24 h. [b] The yield was determined by <sup>1</sup>H NMR by using dimethyl terephthalate as internal standard. [c] The reaction was performed with **1a** (0.10 mmol), NFSI (0.10 mmol), [B] (20 mol%), DBU (2.5 equiv) in toluene (1.0 mL) at 40 °C under N<sub>2</sub> atmosphere for 24 h.

**Table S2. The screening of base.**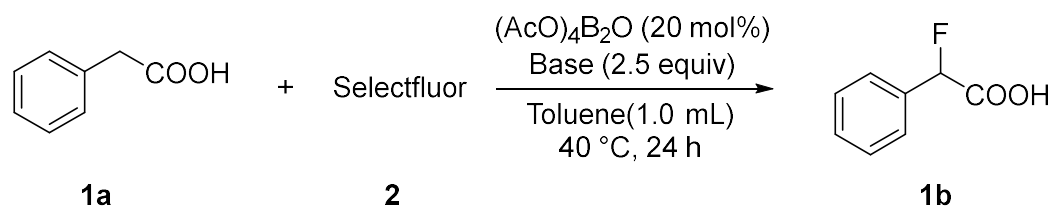

| Entry <sup>[a]</sup> | Base                            | Cat.                                | Yield <sup>[b]</sup> (%) |
|----------------------|---------------------------------|-------------------------------------|--------------------------|
| 1                    | Pyrrolidine                     | (AcO) <sub>4</sub> B <sub>2</sub> O | NR                       |
| 2                    | Pyridine                        | (AcO) <sub>4</sub> B <sub>2</sub> O | 24                       |
| 3                    | Et <sub>3</sub> N               | (AcO) <sub>4</sub> B <sub>2</sub> O | NR                       |
| 4                    | DABCO                           | (AcO) <sub>4</sub> B <sub>2</sub> O | NR                       |
| 5                    | DMAP                            | (AcO) <sub>4</sub> B <sub>2</sub> O | 60                       |
| 6                    | DBU                             | (AcO) <sub>4</sub> B <sub>2</sub> O | 88                       |
| 7                    | TMG                             | (AcO) <sub>4</sub> B <sub>2</sub> O | 54                       |
| 8                    | Na <sub>2</sub> CO <sub>3</sub> | (AcO) <sub>4</sub> B <sub>2</sub> O | NR                       |

[a] All the reactions were performed with **1a** (0.10 mmol), **2** (0.10 mmol), (AcO)<sub>4</sub>B<sub>2</sub>O (20 mol%), base (2.5 equiv) in toluene (1.0 mL) at 40 °C under N<sub>2</sub> atmosphere for 24 h. [b] The yield was determined by <sup>1</sup>H NMR by using dimethyl terephthalate as internal standard; NR = No Reaction.

**Table S3. The screening of solvents and reaction temperature.**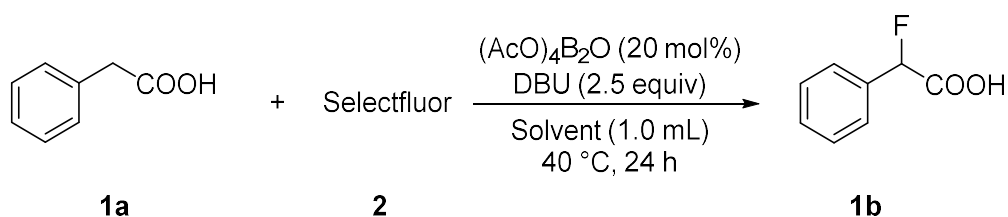

| Entry <sup>[a]</sup> | Solvent           | Base | Yield <sup>[b]</sup> % |
|----------------------|-------------------|------|------------------------|
| 1                    | MTBE              | DBU  | NR                     |
| 2                    | MeCN              | DBU  | NR                     |
| 3                    | Et <sub>2</sub> O | DBU  | NR                     |
| 4                    | THF               | DBU  | 70                     |
| 5                    | DME               | DBU  | 84                     |
| 6                    | Toluene           | DBU  | 96                     |
| 7 <sup>[c]</sup>     | Toluene           | DBU  | 67                     |
| 8 <sup>[d]</sup>     | Toluene           | DBU  | 91                     |
| 9 <sup>[e]</sup>     | Toluene           | DBU  | 60                     |

[a] All the reactions were performed with **1a** (0.10 mmol), **2** (0.10 mmol), (AcO)<sub>4</sub>B<sub>2</sub>O (20 mol%), DBU (2.5 equiv) in toluene (1.0 mL) at 40 °C under N<sub>2</sub> atmosphere for 24 h. [b] The yield was determined by <sup>1</sup>H NMR by using dimethyl terephthalate as internal standard. [c] The reaction temperature was 0 °C. [d] The reaction temperature was 35 °C. [e] The reaction temperature was 60 °C. NR = No Reaction.

**Table S4. Screening on the base and catalyst loading, and the ratio of carboxylic acid to selectfluor.**

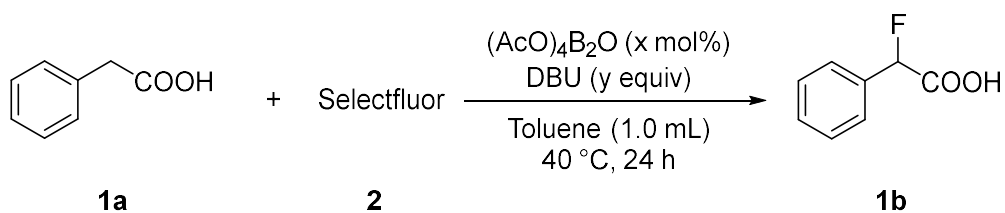

| Entry <sup>[a]</sup> | <b>1a:2</b><br>(x:y) | DBU (x equiv) | Yield <sup>[b]</sup> (%) |
|----------------------|----------------------|---------------|--------------------------|
| 1                    | 1:1                  | 2.5           | 88                       |
| 2                    | 1:1.05               | 2.5           | 88                       |
| 3                    | 1:1.2                | 2.5           | 95                       |
| 4                    | 1:1.5                | 2.5           | 96                       |
| 5                    | 1:2                  | 2.5           | 32                       |
| 6                    | 1:3                  | 2.5           | 20                       |
| 7                    | 1:1.5                | 1.0           | 69                       |
| 8                    | 1:1.5                | 1.5           | 84                       |
| 9                    | 1:1.5                | 2.0           | 96                       |
| 10 <sup>[c]</sup>    | 1:1.5                | 2.0           | trace                    |
| 11 <sup>[d]</sup>    | 1:1.5                | 2.0           | 26                       |
| 12 <sup>[e]</sup>    | 1:1.5                | 2.0           | 90                       |

[a] All the reactions were performed with **1a** (0.10 mmol), **2** (0.10 mmol),  $(\text{AcO})_4\text{B}_2\text{O}$  (20 mol%), DBU (2.5 equiv) in toluene (1.0 mL) at 40 °C under  $\text{N}_2$  atmosphere for 24 h. [b] The yield was determined by  $^1\text{H}$  NMR by using dimethyl terephthalate as internal standard. [c]. The catalyst loading was 5 mol%. [d] The catalyst loading was 10 mol%. [e] The catalyst loading was 15 mol%.

### 3. General Procedure for the Catalytic $\alpha$ -Fluorination Reaction of Free Carboxylic acids.

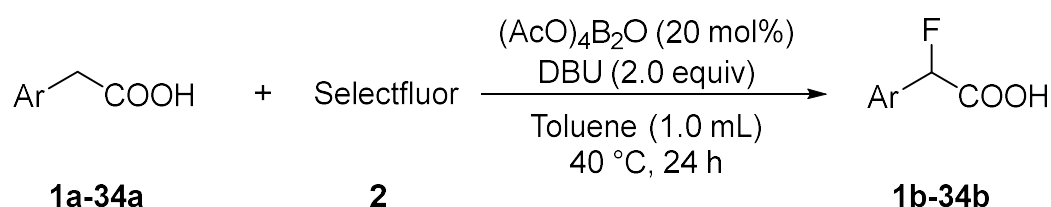

**Procedure:** In the glove-box, a dry reaction tube was charged with free carboxylic acids **1a-34a** (0.1 mmol),  $(\text{AcO})_4\text{B}_2\text{O}$  (20 mol%, 5.5 mg), DBU (2.0 equiv, 38.1 mg) and toluene (1.0 mL). After stirring for 0.5 h, the selectfluor **2** (1.5 equiv) was added to the mixture and kept stirring at 40 °C for the indicated time.

**Work up:** The solvent was removed under reduced pressure, and 1M HCl was added to the obtained residue. Next, the mixture was extracted with MTBE (2 mL  $\times$  3), and the combined organic phase was extracted with 1.0 M NaOH(aq.) (2 mL  $\times$  3). The collected aqueous phase was acidified with 1M HCl to PH =1, and subsequently extracted with MTBE (2 mL  $\times$  3). The combined organic phase was removed under reduced pressure and the residue was subjected to column chromatography on silica gel, eluting with petroleum ether–ethyl acetate (20% EA to 100% EA) to afford the corresponding product **1b-34b**.

### 4. Gram-Scale Synthesis.

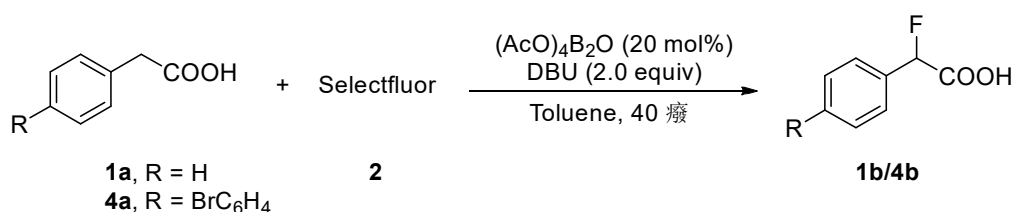

**Procedure for the gram-scale synthesis of 1b:** In the glove-box, a dry reaction tube was charged with free carboxylic acids **1a** (8.0 mmol, 1.09 g),  $(\text{AcO})_4\text{B}_2\text{O}$  (20 mol%, 0.44 g), DBU (16.0 mmol, 2.43 g) and toluene (40.0 mL). After stirring for 0.5 h, the selectfluor **2** (12.0 mmol, 4.20 g) was added to the mixture. And the reaction mixture was stirred at 40 °C for 24 h.



**Procedure for the gram-scale synthesis of 4b:** In the glove-box, a dry reaction tube was charged with free carboxylic acids **4a** (7.0 mmol, 1.50 g), (AcO)<sub>4</sub>B<sub>2</sub>O (20 mol%, 0.38 g), DBU (14.0 mmol, 2.10 g) and toluene (70.0 mL). After stirring for 0.5 h, the selectfluor **2** (10.5 mmol, 3.70 g) was added to the mixture. Then, the reaction mixture was stirred at 40 °C for 24 h.

**Work up:** The solvent was removed under reduced pressure, and 1M HCl was added to the obtained residue. Next, the mixture was extracted with MTBE (20 mL × 3), and the combined organic phase was extracted with 1.0 M NaOH(aq.) (20 mL × 3). The collected aqueous phase was acidified with 1M HCl to PH =1, and subsequently extracted with MTBE (20 mL × 3). The combined organic phase was removed under reduced pressure and the residue was subjected to column chromatography on silica gel, eluting with petroleum ether–ethyl acetate (v/v, 4:1 to 1:1) to afford the corresponding product.

## 5. Failed Examples.

The following alkyl carboxylic acids **39a-42a** were not applicable under the standard reaction conditions, possibly due to the lack of conjugation effect of the phenyl ring leading to poorer nucleophilicity of α-position of alkyl carboxylic acids.

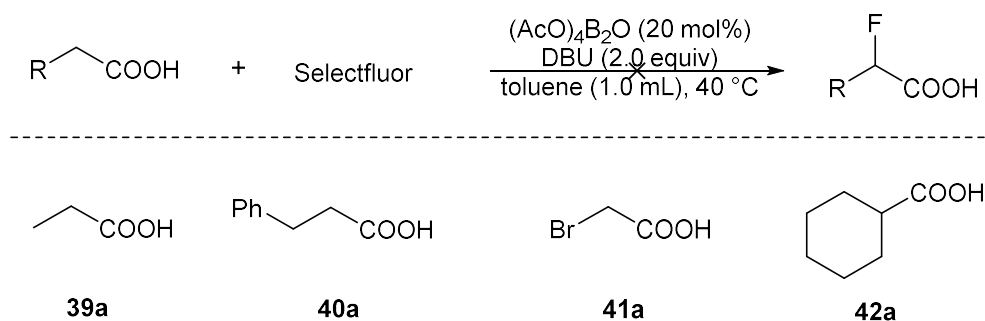

## 6. The X-ray Structure of Product 4b.

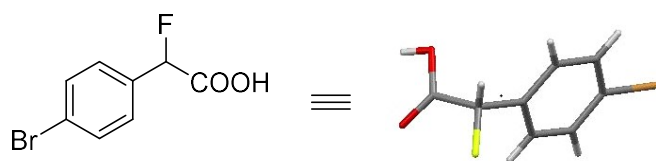

Single crystal of compound **4b** [C<sub>8</sub>H<sub>6</sub>BrFO<sub>2</sub>] was obtained in PE and CH<sub>2</sub>Cl<sub>2</sub>. CCDC 2120636 contains the supplementary crystallographic data which can be obtained free of charge from the Cambridge Crystallographic Data Center via <https://www.ccdc.cam.ac.uk/structures/>.

**Table 1 Crystal data and structure refinement for compound 4b**

|                                             |                                                                               |
|---------------------------------------------|-------------------------------------------------------------------------------|
| Identification code                         | <b>compound 4b</b>                                                            |
| Empirical formula                           | C <sub>16</sub> H <sub>12</sub> O <sub>4</sub> F <sub>2</sub> Br <sub>2</sub> |
| Formula weight                              | 466.08                                                                        |
| Temperature/K                               | 300(2)                                                                        |
| Crystal system                              | monoclinic                                                                    |
| Space group                                 | Pc                                                                            |
| a/Å                                         | 18.9959(7)                                                                    |
| b/Å                                         | 6.0086(3)                                                                     |
| c/Å                                         | 7.7051(3)                                                                     |
| α/°                                         | 90                                                                            |
| β/°                                         | 91.911(4)                                                                     |
| γ/°                                         | 90                                                                            |
| Volume/Å <sup>3</sup>                       | 878.96(6)                                                                     |
| Z                                           | 2                                                                             |
| ρ <sub>calc</sub> /cm <sup>3</sup>          | 1.761                                                                         |
| μ/mm <sup>-1</sup>                          | 6.202                                                                         |
| F(000)                                      | 456.0                                                                         |
| Radiation                                   | CuKα (λ = 1.54178)                                                            |
| 2θ range for data collection/°              | 4.654 to 151.758                                                              |
| Index ranges                                | -23 ≤ h ≤ 23, -7 ≤ k ≤ 7, -9 ≤ l ≤ 7                                          |
| Reflections collected                       | 2780                                                                          |
| Independent reflections                     | 2780 [R <sub>int</sub> = ?, R <sub>sigma</sub> = 0.0450]                      |
| Data/restraints/parameters                  | 2780/5/226                                                                    |
| Goodness-of-fit on F <sup>2</sup>           | 1.107                                                                         |
| Final R indexes [I ≥ 2σ (I)]                | R <sub>1</sub> = 0.0635, wR <sub>2</sub> = 0.1894                             |
| Final R indexes [all data]                  | R <sub>1</sub> = 0.0730, wR <sub>2</sub> = 0.2036                             |
| Largest diff. peak/hole / e Å <sup>-3</sup> | 0.76/-0.49                                                                    |
| Flack parameter                             | 0.00(3)                                                                       |

## 7. Characterization of the Products.

### 2-fluoro-2-phenylacetic acid (1b)

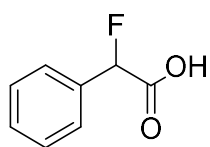

Following the general procedure, the optimized time is 24 h. Yield: 96% (14.8 mg); white solid; m.p. 80 – 85 °C.

$^1\text{H NMR}$  (600 MHz,  $\text{CDCl}_3$ )  $\delta$  8.46 (s, 1H), 7.48 (dd,  $J = 6.9, 2.9$  Hz, 2H), 7.42 (q,  $J = 3.8$  Hz, 3H), 5.81 (d,  $J = 47.4$  Hz, 1H);

$^{13}\text{C}\{^1\text{H}\}$  NMR (150 MHz,  $\text{CDCl}_3$ )  $\delta$  174.00 (d,  $J = 28.5$  Hz), 133.47 (d,  $J = 21.0$  Hz), 129.95, 128.92, 126.71, 126.68, 88.83 (d,  $J = 186.0$  Hz);

$^{19}\text{F NMR}$  (565 MHz,  $\text{CDCl}_3$ )  $\delta$  -180.78 (d,  $J = 45.2$  Hz).

HRMS (ESI<sup>-</sup>): calculated  $m/z$   $[\text{M-H}]^-$  for  $[\text{C}_8\text{H}_8\text{FO}_2]^-$ : 153.0346, found: 153.0346.

### 2-fluoro-2-(4-fluorophenyl)acetic acid (2b)

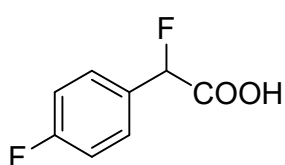

Following the general procedure, the optimized time is 24 h. Yield: 92% (15.8 mg); white solid; m.p. 92 – 103 °C.

$^1\text{H NMR}$  (600 MHz,  $\text{CDCl}_3$ )  $\delta$  8.46 (s, 1H), 7.47 (dd,  $J = 8.5, 5.2$  Hz, 2H), 7.11 (t,  $J = 8.6$  Hz, 2H), 5.80 (d,  $J = 47.2$  Hz, 1H);

$^{13}\text{C}\{^1\text{H}\}$  NMR (150 MHz,  $\text{CDCl}_3$ )  $\delta$  173.69 (d,  $J = 25.5$  Hz), 163.62 (d,  $J = 247.5$  Hz), 129.46, 129.44, 129.32, 129.30, 128.82, 128.78, 128.76, 128.72, 116.12, 115.97, 88.20 (d,  $J = 187.5$  Hz);

$^{19}\text{F NMR}$  (565 MHz,  $\text{CDCl}_3$ )  $\delta$  -110.69 – -110.75 (m, 1F), -179.30 (d, 45.2 Hz).

HRMS (ESI<sup>-</sup>): calculated  $m/z$   $[\text{M-H}]^-$  for  $[\text{C}_8\text{H}_5\text{F}_2\text{O}_2]^-$ : 153.0346, found: 153.0346.

### 2-(4-chlorophenyl)-2-fluoroacetic acid (3b)

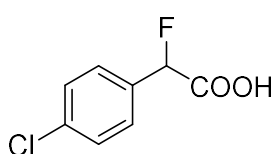

Following the general procedure, the optimized time is 24 h. Yield: 92% (17.3 mg); white solid; m.p. 71 – 80 °C.

$^1\text{H NMR}$  (600 MHz,  $\text{CDCl}_3$ )  $\delta$  8.40 (s, 1H), 7.49 – 7.34 (m, 4H), 5.80 (d,  $J = 47.1$  Hz, 1H);

$^{13}\text{C}\{^1\text{H}\}$  NMR (150 MHz,  $\text{CDCl}_3$ )  $\delta$  173.55 (d,  $J = 27.0$  Hz), 136.09 (d,  $J = 1.5$  Hz), 131.87 (d,  $J = 21.0$  Hz), 129.20, 127.99, 127.95, 88.09 (d,  $J = 186.0$  Hz);

$^{19}\text{F}$  NMR (565 MHz,  $\text{CDCl}_3$ )  $\delta$  -181.75 (d,  $J$  = 45.2 Hz).

**HRMS (ESI-):** calculated  $m/z$   $[\text{M-H}]^-$  for  $[\text{C}_8\text{H}_5\text{Cl}^{35}\text{FO}_2]^-$ : 186.9957, found: 186.9960;  
 $[\text{C}_8\text{H}_5\text{Cl}^{37}\text{FO}_2]^-$ : 188.9927, found: 188.9930.

#### 2-(4-bromophenyl)-2-fluoroacetic acid (4b)

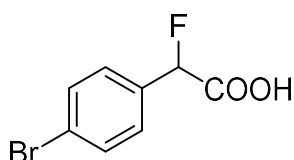

Following the general procedure, the optimized time is 24 h. Yield: 94%  
(21.9 mg); white solid; m.p. 96 –103 °C.

$^1\text{H}$  NMR (600 MHz,  $\text{CDCl}_3$ )  $\delta$  7.56 (d,  $J$  = 8.2 Hz, 2H), 7.36 (d,  $J$  = 8.2 Hz, 2H), 5.78 (d,  $J$  = 47.2 Hz, 1H);

$^{13}\text{C}\{^1\text{H}\}$  NMR (150 MHz,  $\text{CDCl}_3$ )  $\delta$  173.28 (d,  $J$  = 25.5 Hz), 132.4 (d,  $J$  = 21.0 Hz), 132.16, 128.20 (d,  $J$  = 7.5 Hz), 124.29, 88.14 (d,  $J$  = 187.5 Hz);

$^{19}\text{F}$  NMR (565 MHz,  $\text{CDCl}_3$ )  $\delta$  -182.21 (d,  $J$  = 50.1 Hz).

**HRMS (ESI-):** calculated  $m/z$   $[\text{M-H}]^-$  for  $[\text{C}_8\text{H}_5\text{Br}^{79}\text{FO}_2]^-$ : 230.9451, found: 230.9458;  
 $[\text{C}_8\text{H}_5\text{Br}^{81}\text{FO}_2]^-$ : 232.9431, found: 232.9437.

#### 2-fluoro-2-(4-iodophenyl)acetic acid (5b)

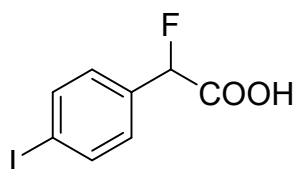

Following the general procedure, the optimized time is 24 h. Yield: 92%  
(25.8 mg); white solid; m.p. 129 –135 °C.

$^1\text{H}$  NMR (600 MHz,  $\text{CDCl}_3$ )  $\delta$  7.77 (d,  $J$  = 8.1 Hz, 2H), 7.22 (d,  $J$  = 8.1 Hz, 2H), 6.09 (s, 1H), 5.77 (d,  $J$  = 47.2 Hz, 1H);

$^{13}\text{C}\{^1\text{H}\}$  NMR (150 MHz,  $\text{CDCl}_3$ )  $\delta$  172.82 (d,  $J$  = 27.0 Hz), 138.09, 133.10 (d,  $J$  = 19.5 Hz), 128.27 (d,  $J$  = 6.0 Hz), 96.11, 88.24 (d,  $J$  = 187.5 Hz);

$^{19}\text{F}$  NMR (565 MHz,  $\text{CDCl}_3$ )  $\delta$  -182.61 (d,  $J$  = 45.2 Hz).

**HRMS (ESI-):** calculated  $m/z$   $[\text{M-H}]^-$  for  $[\text{C}_8\text{H}_5\text{IFO}_2]^-$ : 278.9313, found: 278.9322.

#### 2-(4-cyanophenyl)-2-fluoroacetic acid (6b)

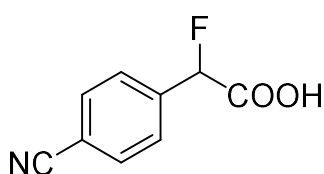

Following the general procedure, the optimized time is 24 h. Yield: 60%  
(10.8 mg); white solid; m.p. 90 – 111 °C.

$^1\text{H}$  NMR (600 MHz,  $\text{CDCl}_3$ )  $\delta$  7.73 (d,  $J$  = 8.1 Hz, 2H), 7.63 (d,  $J$  = 8.1 Hz, 2H), 7.32 (s, 1H), 5.90 (d,  $J$  = 47.1 Hz, 1H);

$^{13}\text{C}\{^1\text{H}\}$  NMR (150 MHz,  $\text{CDCl}_3$ )  $\delta$  171.77 (d,  $J = 27.0$  Hz), 138.43 (d,  $J = 19.5$  Hz), 132.66, 126.96, 126.92, 117.98, 113.62, 87.82 (d,  $J = 189.0$  Hz);

$^{19}\text{F}$  NMR (565 MHz,  $\text{CDCl}_3$ )  $\delta$  -186.37 (d,  $J = 45.2$  Hz).

HRMS (ESI<sup>-</sup>): calculated  $m/z$   $[\text{M}-\text{H}]^-$  for  $[\text{C}_9\text{H}_5\text{FNO}_2]^-$ : 178.0299, found: 178.0300.

### 2-fluoro-2-(4-(trifluoromethyl)phenyl)acetic acid (7b)

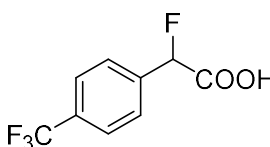 Following the general procedure, the optimized time is 24 h. Yield: 87% (19.3 mg); white solid; m.p. 82 – 92 °C.

$^1\text{H}$  NMR (600 MHz,  $\text{CDCl}_3$ )  $\delta$  8.01 (s, 1H), 7.69 (d,  $J = 8.1$  Hz, 2H), 7.62 (d,  $J = 8.1$  Hz, 2H), 5.90 (d,  $J = 47.1$  Hz, 1H);

$^{13}\text{C}\{^1\text{H}\}$  NMR (150 MHz,  $\text{CDCl}_3$ )  $\delta$  173.01 (d,  $J = 30.0$  Hz), 137.15 (d,  $J = 21.0$  Hz), 132.02 (d,  $J = 31.5$  Hz), 126.76, 126.72, 126.27, 125.94, 125.91, 125.89, 125.86, 125.82, 123.68 (d,  $J = 270.0$  Hz), 88.01 (d,  $J = 187.5$  Hz);

$^{19}\text{F}$  NMR (565 MHz,  $\text{CDCl}_3$ )  $\delta$  -62.92 (s, 3F), -185.09 (d,  $J = 45.2$  Hz).

HRMS (ESI<sup>-</sup>): calculated  $m/z$   $[\text{M}-\text{H}]^-$  for  $[\text{C}_9\text{H}_5\text{F}_4\text{O}_2]^-$ : 221.0220, found: 221.0226.

### 2-fluoro-2-(4-(methoxycarbonyl)phenyl)acetic acid (8b)

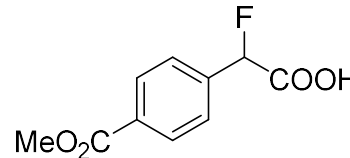 Following the general procedure, the optimized time is 24 h. Yield: 92% (19.5 mg); white solid; m.p. 77 – 84 °C.

$^1\text{H}$  NMR (600 MHz,  $\text{CDCl}_3$ )  $\delta$  8.08 (d,  $J = 8.0$  Hz, 2H), 7.57 (d,  $J = 8.0$  Hz, 2H), 5.89 (d,  $J = 47.3$  Hz, 1H), 3.93 (s, 3H);

$^{13}\text{C}\{^1\text{H}\}$  NMR (150 MHz,  $\text{CDCl}_3$ )  $\delta$  177.86, 167.47, 132.37, 131.07, 127.37, 127.32, 89.23 (d,  $J = 199.5$  Hz), 53.40;

$^{19}\text{F}$  NMR (565 MHz,  $\text{CDCl}_3$ )  $\delta$  -184.35 (d,  $J = 50.9$  Hz).

HRMS (ESI<sup>-</sup>): calculated  $m/z$   $[\text{M}-\text{H}]^-$  for  $[\text{C}_{10}\text{H}_8\text{FO}_4]^-$ : 211.0401, found: 211.0405.

### 2-([1,1'-biphenyl]-4-yl)-2-fluoroacetic acid (9b)

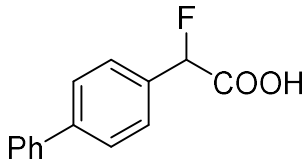 Following the general procedure, the optimized time is 24 h. Yield: 95% (21.9 mg); white solid; m.p. 162 – 168 °C.

$^1\text{H}$  NMR (600 MHz,  $\text{DMSO}-d$ )  $\delta$  7.73 (d,  $J = 8.0$  Hz, 2H), 7.70 – 7.65 (m,

2H), 7.56 – 7.44 (m, 4H), 7.39 (t,  $J = 7.4$  Hz, 1H), 6.03 (d,  $J = 47.6$  Hz, 1H);

$^{13}\text{C}\{^1\text{H}\}$  NMR (150 MHz, DMSO- $d$ )  $\delta$  170.08 (d,  $J = 27.0$  Hz), 141.50, 139.75, 134.59, 134.46, 129.33, 128.14, 127.89, 127.86, 127.37, 127.12, 88.83 (d,  $J = 178.5$  Hz);

$^{19}\text{F}$  NMR (565 MHz, DMSO- $d$ )  $\delta$  -170.75 (d,  $J = 50.9$  Hz).

HRMS (ESI-): calculated  $m/z$   $[\text{M}-\text{H}]^-$  for  $[\text{C}_{10}\text{H}_8\text{FO}_4]^-$ : 229.0659, found: 229.0665.

### 2-(4-(tert-butyl)phenyl)-2-fluoroacetic acid (10b)

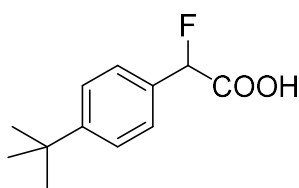

Following the general procedure, the optimized time is 24 h. Yield: 95% (19.9 mg); white solid; m.p. 98 – 108 °C

$^1\text{H}$  NMR (600 MHz,  $\text{CDCl}_3$ )  $\delta$  8.70 (s, 1H), 7.47 – 7.25 (m, 4H), 5.71 (d,  $J = 47.5$  Hz, 1H), 1.24 (s, 9H);

$^{13}\text{C}\{^1\text{H}\}$  NMR (150 MHz,  $\text{CDCl}_3$ )  $\delta$  174.36 ( $J = 28.5$  Hz), 153.23, 130.49 ( $J = 4.5$  Hz), 126.60 ( $J = 4.5$  Hz), 125.92, 88.78 ( $J = 186.0$  Hz), 34.79, 31.24;

$^{19}\text{F}$  NMR (565 MHz,  $\text{CDCl}_3$ )  $\delta$  -179.19 (d,  $J = 45.2$  Hz).

HRMS (ESI-): calculated  $m/z$   $[\text{M}-\text{H}]^-$  for  $[\text{C}_{14}\text{H}_{10}\text{FO}_2]^-$ : 209.0972, found: 209.0977.

### 2-fluoro-2-(p-tolyl)acetic acid (11b)

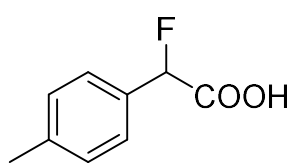

Following the general procedure, the optimized time is 24 h. Yield: 80% (13.4 mg); oil.

$^1\text{H}$  NMR (600 MHz,  $\text{CDCl}_3$ )  $\delta$  7.29 (d,  $J = 7.7$  Hz, 2H), 7.15 (d,  $J = 7.8$  Hz, 2H), 5.71 (d,  $J = 47.5$  Hz, 1H), 2.30 (s, 3H);

$^{13}\text{C}\{^1\text{H}\}$  NMR (150 MHz,  $\text{CDCl}_3$ )  $\delta$  173.86, 140.13, 130.55 (d,  $J = 21.0$  Hz), 129.61, 126.82, 126.79, 88.83 (d,  $J = 184.5$  Hz), 21.32;

$^{19}\text{F}$  NMR (565 MHz,  $\text{CDCl}_3$ )  $\delta$  -178.61 (d,  $J = 45.2$  Hz).

HRMS (ESI-): calculated  $m/z$   $[\text{M}-\text{H}]^-$  for  $[\text{C}_9\text{H}_8\text{FO}_2]^-$ : 167.0503, found: 167.0503.

### 2-fluoro-2-(m-tolyl)acetic acid (12b)

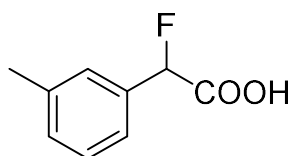

Following the general procedure, the optimized time is 24 h. Yield: 89% (15.1 mg); light yellow oil.

$^1\text{H}$  NMR (600 MHz,  $\text{CDCl}_3$ )  $\delta$  9.09 (s, 1H), 7.33 – 7.19 (m, 4H), 5.77 (d,  $J$

= 47.5 Hz, 1H), 2.37 (s, 3H);

$^{13}\text{C}\{^1\text{H}\}$  NMR (150 MHz,  $\text{CDCl}_3$ )  $\delta$  174.33 (d,  $J = 28.5$  Hz), 138.85, 133.41, 133.27, 130.76, 128.83, 127.3 (d,  $J = 6.0$  Hz) 127.32, 127.28, 123.88 (d,  $J = 7.5$  Hz), 88.89 (d,  $J = 186.0$  Hz), 21.36;

$^{19}\text{F}$  NMR (565 MHz,  $\text{CDCl}_3$ )  $\delta$  -180.18 (d,  $J = 45.2$  Hz).

HRMS (ESI-): calculated  $m/z$   $[\text{M-H}]^-$  for  $[\text{C}_9\text{H}_8\text{FO}_2]^-$ : 167.0503, found: 167.0503.

### 2-fluoro-2-(*o*-tolyl)acetic acid (13b)

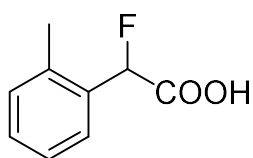

Following the general procedure, the optimized time is 24 h. Yield: 90% (15.1 mg); white solid; m.p. 47 – 54 °C.

$^1\text{H}$  NMR (600 MHz,  $\text{CDCl}_3$ )  $\delta$  7.42 (d,  $J = 7.6$  Hz, 1H), 7.33 – 7.20 (m, 3H), 6.02 (d,  $J = 47.0$  Hz, 1H), 5.67 (s, 1H), 2.45 (s, 3H);

$^{13}\text{C}\{^1\text{H}\}$  NMR (150 MHz,  $\text{CDCl}_3$ )  $\delta$  173.87, 136.66 (d,  $J = 4.5$  Hz), 132.12, 131.99, 131.03, 129.96, 127.32 (d,  $J = 7.5$  Hz), 126.46 (d,  $J = 4.5$  Hz), 86.76 (d,  $J = 184.5$  Hz), 19.19;

$^{19}\text{F}$  NMR (565 MHz,  $\text{CDCl}_3$ )  $\delta$  -180.08 (d,  $J = 45.2$  Hz).

HRMS (ESI-): calculated  $m/z$   $[\text{M-H}]^-$  for  $[\text{C}_9\text{H}_8\text{FO}_2]^-$ : 167.0503, found: 167.0504.

### 2-(2-chlorophenyl)-2-fluoroacetic acid (14b)

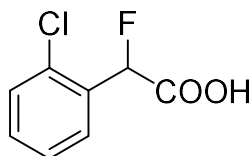

Following the general procedure, the optimized time is 24 h. Yield: 92% (17.3 mg); colorless oil.

$^1\text{H}$  NMR (600 MHz,  $\text{CDCl}_3$ )  $\delta$  7.52 (dd,  $J = 7.5, 1.9$  Hz, 1H), 7.44 (d,  $J = 7.7$  Hz, 1H), 7.40 – 7.31 (m, 2H), 7.11 (s, 1H), 6.27 (d,  $J = 46.4$  Hz, 1H);

$^{13}\text{C}\{^1\text{H}\}$  NMR (150 MHz,  $\text{CDCl}_3$ )  $\delta$  172.87 (d,  $J = 28.5$  Hz), 133.67 (d,  $J = 4.5$  Hz), 131.68 (d,  $J = 21.0$  Hz), 131.28, 130.06, 128.71 (d,  $J = 6.0$  Hz), 127.41, 85.80 (d,  $J = 184.5$  Hz);

$^{19}\text{F}$  NMR (565 MHz,  $\text{CDCl}_3$ )  $\delta$  -181.06 (d,  $J = 45.2$  Hz).

HRMS (ESI-): calculated  $m/z$   $[\text{M-H}]^-$  for  $[\text{C}_8\text{H}_5\text{Cl}^{35}\text{FO}_2]^-$ : 186.9957, found: 186.9959;  $[\text{C}_8\text{H}_5\text{Cl}^{37}\text{FO}_2]^-$ : 188.9927, found: 188.9929.

### 2-fluoro-2-(naphthalen-1-yl)acetic acid (15b)

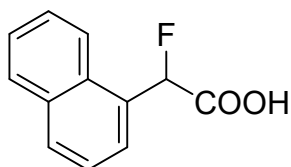

Following the general procedure, the optimized time is 24 h. Yield: 93% (19.0 mg); white solid; m.p. 145 – 151 °C.

**<sup>1</sup>H NMR** (600 MHz, CDCl<sub>3</sub>) δ 8.14 (d, *J* = 8.3 Hz, 1H), 7.97 – 7.83 (m, 2H), 7.61 (d, *J* = 7.1 Hz, 1H), 7.57 – 7.51 (m, 2H), 7.48 (t, *J* = 7.7 Hz, 1H), 6.39 (d, *J* = 46.8 Hz, 1H);

**<sup>13</sup>C{<sup>1</sup>H} NMR** (150 MHz, CDCl<sub>3</sub>) δ 174.11 (d, *J* = 27.0 Hz), 133.89, 130.90, 130.51, (d, *J* = 19.5 Hz), 128.92, 127.24, 127.00 (d, *J* = 9.0 Hz), 126.35, 125.11, 123.58, 88.08 (d, *J* = 186.0 Hz);

**<sup>19</sup>F NMR** (565 MHz, CDCl<sub>3</sub>) δ -178.63 (d, *J* = 45.2 Hz).

**HRMS (ESI-):** calculated *m/z* [M-H]<sup>-</sup> for [C<sub>12</sub>H<sub>8</sub>FO<sub>2</sub>]<sup>-</sup>: 203.0503, found: 203.0506.

### 2-fluoro-2-(naphthalen-2-yl)acetic acid (16b)

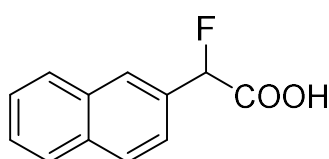

Following the general procedure, the optimized time is 24 h. Yield: 87% (17.8 mg); white solid; m.p. 161 – 171 °C.

**<sup>1</sup>H NMR** (600 MHz, DMSO-*d*) δ 8.04 (s, 1H), 7.99 (dd, *J* = 8.8, 3.9 Hz, 2H), 7.97 – 7.92 (m, 1H), 7.62 – 7.52 (m, 3H), 6.18 (d, *J* = 47.4 Hz, 1H),

3.44 (s, 1H);

**<sup>13</sup>C{<sup>1</sup>H} NMR** (150 MHz, DMSO-*d*) δ 170.09 (d, *J* = 27.0 Hz), 133.43, 132.91, 132.81, 132.77, 128.88, 128.50, 128.01, 127.31, 127.08, 126.98, 126.94, 126.91, 124.28 (d, *J* = 4.5 Hz), 89.2 (d, *J* = 150 Hz);

**<sup>19</sup>F NMR** (565 MHz, DMSO-*d*) δ -171.01 (d, *J* = 50.9 Hz).

**HRMS (ESI-):** calculated *m/z* [M-H]<sup>-</sup> for [C<sub>12</sub>H<sub>8</sub>FO<sub>2</sub>]<sup>-</sup>: 203.0503, found: 203.0507.

### 2-(3,5-dimethylphenyl)-2-fluoroacetic acid (17b)

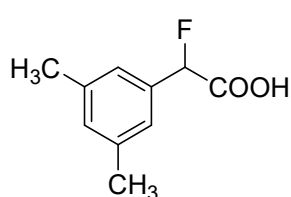

Following the general procedure, the optimized time is 24 h. Yield: 92% (16.8 mg); white solid; m.p. 70 – 81 °C.

**<sup>1</sup>H NMR** (600 MHz, CDCl<sub>3</sub>) δ 8.23 (s, 1H), 7.07 (d, *J* = 20.0 Hz, 3H), 5.73 (d, *J* = 47.6 Hz, 1H), 2.33 (s, 6H);

**<sup>13</sup>C{<sup>1</sup>H} NMR** (150 MHz, CDCl<sub>3</sub>) δ 174.25 (d, *J* = 37.5 Hz), 138.72, 133.29 (d, *J* = 19.5 Hz), 131.66, 124.55, 124.51, 88.98 (d, *J* = 184.5 Hz), 21.24;

**<sup>19</sup>F NMR** (565 MHz, CDCl<sub>3</sub>) δ -179.42 (d, *J* = 45.2 Hz).

**HRMS (ESI-):** calculated *m/z* [M-H]<sup>-</sup> for [C<sub>10</sub>H<sub>10</sub>FO<sub>2</sub>]<sup>-</sup>: 181.0659, found: 181.0667.

### 2-(3,5-dichlorophenyl)-2-fluoroacetic acid (18b)



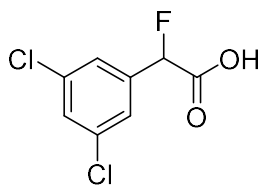

Following the general procedure, the optimized time is 24 h. Yield: 94% (21.0 mg); white solid; m.p. 82 – 85 °C.

$^1\text{H NMR}$  (600 MHz,  $\text{CDCl}_3$ )  $\delta$  9.12 (s, 1H), 7.31 (dd,  $J = 14.3, 1.9$  Hz, 3H), 5.69 (d,  $J = 47.0$  Hz, 1H).

$^{13}\text{C}\{^1\text{H}\}$  NMR (150 MHz,  $\text{CDCl}_3$ )  $\delta$  172.84 (d,  $J = 27.0$  Hz), 136.36 (d,  $J = 22.5$  Hz), 135.68, 130.03, 124.89, 124.84, 87.27 (d,  $J = 189.0$  Hz).

$^{19}\text{F NMR}$  (565 MHz,  $\text{CDCl}_3$ )  $\delta$  -184.86 (d,  $J = 45.2$  Hz).

**HRMS (ESI-):** calculated  $m/z$   $[\text{M-H}]^-$  for  $[\text{C}_8\text{H}_4\text{Cl}^{35}_2\text{FO}_2]^-$ : 220.9567, found: 220.9572;  $[\text{C}_8\text{H}_4\text{Cl}^{37}_2\text{FO}_2]^-$ : 222.9537, found: 222.9542.

### 2-(3,4-dimethylphenyl)-2-fluoroacetic acid (19b)

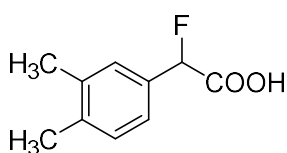

Following the general procedure, the optimized time is 24 h. Yield: 90% (16.4 mg); white solid; m.p. 47 – 55 °C.

$^1\text{H NMR}$  (600 MHz,  $\text{CDCl}_3$ )  $\delta$  8.32 (s, 1H), 7.18 – 7.08 (m, 3H), 5.66 (d,  $J = 47.6$  Hz, 1H), 2.20 (s, 6H);

$^{13}\text{C}\{^1\text{H}\}$  NMR (150 MHz,  $\text{CDCl}_3$ )  $\delta$  174.32 (d,  $J = 28.5$  Hz), 138.82, 137.42, 130.94 (d,  $J = 21.0$  Hz), 130.12, 127.98 (d,  $J = 6.0$  Hz), 124.44 (d,  $J = 4.5$  Hz), 88.91 (d,  $J = 184.5$  Hz), 19.77, 19.67;

$^{19}\text{F NMR}$  (565 MHz,  $\text{CDCl}_3$ )  $\delta$  -178.73 (d,  $J = 45.2$  Hz).

**HRMS (ESI-):** calculated  $m/z$   $[\text{M-H}]^-$  for  $[\text{C}_{10}\text{H}_{10}\text{FO}_2]^-$ : 181.0659, found: 181.0660.

### 2-fluoro-2-(3-fluoro-4-methoxyphenyl)acetic acid (20b)

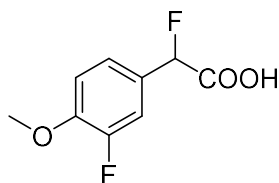

Following the general procedure, the optimized time is 24 h. Yield: 90% (18.2 mg); white solid; m.p. 103 – 111 °C

$^1\text{H NMR}$  (600 MHz,  $\text{CDCl}_3$ )  $\delta$  7.18 – 7.11 (m, 2H), 6.92 (t,  $J = 8.7$  Hz, 1H), 5.68 (d,  $J = 47.2$  Hz, 1H), 4.37 (s, 1H), 3.84 (s, 3H).

$^{13}\text{C}\{^1\text{H}\}$  NMR (150 MHz,  $\text{CDCl}_3$ )  $\delta$  172.47 (d,  $J = 28.5$  Hz), 153.10, 151.46, 149.05 (d,  $J = 186.0$  Hz), 126.20, 126.15, 126.01, 123.25, 114.70 (dd,  $J = 19.5, 6.0$  Hz), 113.38, 88.01 (d,  $J = 186.0$  Hz), 56.29.

$^{19}\text{F NMR}$  (565 MHz,  $\text{CDCl}_3$ )  $\delta$  -177.74 (d,  $J = 11.3$  Hz), -133.52 (d,  $J = 45.2$  Hz).

**HRMS (ESI-):** calculated  $m/z$   $[\text{M-H}]^-$  for  $[\text{C}_9\text{H}_7\text{F}_2\text{O}_3]^-$ : 201.0358, found: 201.0361.

### methyl 2-fluoro-2-mesitylacetate (21b)

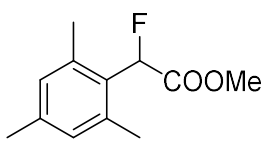

Following the general procedure, the optimized time is 24 h. Yield: 20% (4.3 mg); colorless oil.

$^1\text{H NMR}$  (600 MHz,  $\text{CDCl}_3$ )  $\delta$  6.80 (s, 2H), 6.10 (d,  $J = 46.1$  Hz, 1H), 3.70 (s, 3H), 2.29 (d,  $J = 2.3$  Hz, 6H), 2.20 (d,  $J = 2.1$  Hz, 3H).

$^{13}\text{C}\{^1\text{H}\}$  NMR (150 MHz,  $\text{CDCl}_3$ )  $\delta$  170.00, (d,  $J = 28.5$  Hz), 139.38 (d,  $J = 1.5$  Hz), 137.62 (d,  $J = 3.0$  Hz), 129.85, 128.22 (d,  $J = 16.5$  Hz), 85.93 (d,  $J = 181.5$  Hz), 52.63, 21.00, 19.83.

$^{19}\text{F NMR}$  (565 MHz,  $\text{CDCl}_3$ )  $\delta$  -182.71 (d,  $J = 45.2$  Hz).

**HRMS (ESI-TOF):** calculated  $m/z$   $[\text{M-H}]^-$  for  $[\text{C}_{12}\text{H}_{15}\text{FO}_2 + \text{H}^+]$ : 211.1134, found: 211.1133.

### 2-fluoro-2-phenylpropanoic acid (22b)

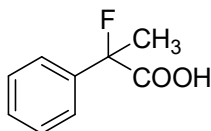

Following the general procedure, the optimized time is 24 h. Yield: 65% (10.9 mg); colorless oil.

$^1\text{H NMR}$  (600 MHz,  $\text{CDCl}_3$ )  $\delta$  7.57 – 7.50 (m, 2H), 7.43 – 7.32 (m, 3H), 6.83 (s, 1H), 1.95 (d,  $J = 22.3$  Hz, 3H);

$^{13}\text{C}\{^1\text{H}\}$  NMR (150 MHz,  $\text{CDCl}_3$ )  $\delta$  175.69 (d,  $J = 22.5$  Hz), 138.52 (d,  $J = 22.5$  Hz), 128.89, 128.58, 124.75, 124.69, 94.42 (d,  $J = 220.5$  Hz), 24.49 (d,  $J = 24.0$  Hz);

$^{19}\text{F NMR}$  (565 MHz,  $\text{CDCl}_3$ )  $\delta$  -151.26 (q,  $J = 22.6$  Hz).

**HRMS (ESI-):** calculated  $m/z$   $[\text{M-H}]^-$  for  $[\text{C}_9\text{H}_8\text{FO}_2]^-$ : 167.0503, found: 167.0503.

### 2-fluoro-2-phenylbutanoic acid (23b)

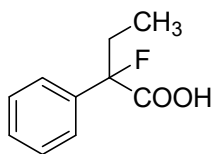

Following the general procedure, the optimized time is 24 h. Yield: 46% (8.4 mg); light yellow oil.

$^1\text{H NMR}$  (600 MHz,  $\text{CDCl}_3$ )  $\delta$  7.51 (q,  $J = 8.6$  Hz, 2H), 7.41 – 7.27 (m, 3H), 6.74 (s, 1H), 2.47 – 2.11 (m, 2H), 0.97 (p,  $J = 7.6$  Hz, 3H);

$^{13}\text{C}\{^1\text{H}\}$  NMR (150 MHz,  $\text{CDCl}_3$ )  $\delta$  175.38 (d,  $J = 31.5$  Hz), 137.32 (d,  $J = 24.0$  Hz), 128.71, 128.54, 124.86, 124.80, 97.18, 97.18 (d,  $J = 187.5$  Hz), 31.27 (d,  $J = 22.5$  Hz), 7.45;

$^{19}\text{F NMR}$  (565 MHz,  $\text{CDCl}_3$ )  $\delta$  -166.72 (s, 1F).

**HRMS (ESI-):** calculated  $m/z$   $[\text{M-H}]^-$  for  $[\text{C}_{10}\text{H}_{10}\text{FO}_2]^-$ : 181.0659, found: 181.0661.

### 2-(2,3-bis((2-chlorobenzyl)oxy)phenyl)-2-fluoroacetic acid (25b)

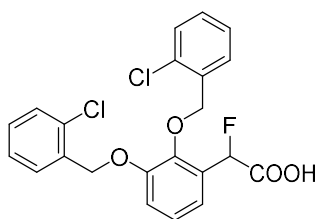

Following the general procedure, the optimized time is 24 h. Yield: 82% (35.7 mg); colorless oil.

$^1\text{H NMR}$  (600 MHz,  $\text{CDCl}_3$ )  $\delta$  7.50 (s, 1H), 7.48 (dd,  $J = 6.5, 2.8$  Hz, 1H), 7.38 (dd,  $J = 7.6, 1.6$  Hz, 1H), 7.29 (d,  $J = 7.9$  Hz, 1H), 7.27 – 7.22 (m, 1H), 7.19 – 7.10 (m, 4H), 7.06 – 6.95 (m, 3H), 6.09 (d,  $J = 47.1$  Hz, 1H), 5.19 (d,  $J = 2.5$  Hz, 2H), 5.12 (s, 2H);

$^{13}\text{C}\{^1\text{H}\}$  NMR (150 MHz,  $\text{CDCl}_3$ )  $\delta$  173.59 (d,  $J = 21.0$  Hz), 151.66, 146.33, 146.31, 135.02, 134.03, 132.86 (d,  $J = 12.0$  Hz), 129.73, 129.44, 129.31, 129.25, 129.17, 129.15, 128.49 (d,  $J = 19.5$  Hz), 127.04, 126.88, 124.91, 120.82, 120.79, 115.88, 84.4 (d,  $J = 183.0$  Hz), 72.48, 68.18;

$^{19}\text{F NMR}$  (565 MHz,  $\text{CDCl}_3$ )  $\delta$  -177.57 (d,  $J = 50.9$  Hz).

**HRMS (ESI-):** calculated  $m/z$   $[\text{M-H}]^-$  for  $[\text{C}_{22}\text{H}_{16}\text{Cl}^{35}_2\text{FO}_4]^-$ : 433.0404, found: 433.0414;  $[\text{C}_{22}\text{H}_{16}\text{Cl}^{37}_2\text{FO}_4]^-$ : 435.0375, found: 435.0384.

### 2-fluoro-2-(3-pentylphenyl)acetic acid (26b)

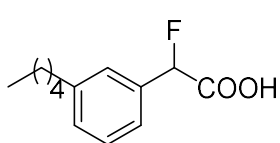

Following the general procedure, the optimized time is 24 h. Yield: 74% (16.5 mg); colorless oil.

$^1\text{H NMR}$  (600 MHz,  $\text{CDCl}_3$ )  $\delta$  7.29 (q,  $J = 7.2$  Hz, 3H), 7.23 (d,  $J = 7.4$  Hz, 1H), 5.78 (d,  $J = 47.6$  Hz, 1H), 2.61 (t,  $J = 7.9$  Hz, 2H), 1.61 (t,  $J = 7.5$  Hz, 2H), 1.32 (ddt,  $J = 11.3, 7.4, 4.8$  Hz, 4H), 0.88 (td,  $J = 7.0, 2.9$  Hz, 3H);

$^{13}\text{C}\{^1\text{H}\}$  NMR (150 MHz,  $\text{CDCl}_3$ )  $\delta$  173.70, 143.87, 133.41 (d,  $J = 21.0$  Hz), 130.03, 128.79, 126.70 (d,  $J = 21.0$  Hz), 126.70 (d,  $J = 4.5$  Hz), 124.03 (d,  $J = 4.5$  Hz), 89.03 (d,  $J = 184.5$  Hz), 35.80, 31.49, 31.02, 22.50, 14.01;

$^{19}\text{F NMR}$  (565 MHz,  $\text{CDCl}_3$ )  $\delta$  -179.90 (d,  $J = 45.2$  Hz).

**HRMS (ESI-):** calculated  $m/z$   $[\text{M-H}]^-$  for  $[\text{C}_{13}\text{H}_{16}\text{FO}_2]^-$ : 223.1129, found: 223.1134.

### 2-fluoro-2-(9-oxo-9,10-dihydroanthracen-2-yl)acetic acid (27b)

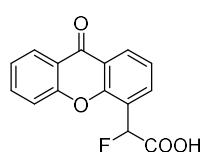

Following the general procedure, the optimized time is 24 h. Yield: 30% (8.1 mg); white solid; m.p. 165 – 174 °C.

$^1\text{H NMR}$  (600 MHz,  $\text{DMSO}-d_6$ )  $\delta$  8.27 (dt,  $J = 8.0, 1.5$  Hz, 1H), 8.18 (dd,  $J = 7.9,$

1.5 Hz, 1H), 7.99 (d,  $J = 7.4$  Hz, 1H), 7.89 (ddd,  $J = 8.7, 7.1, 1.6$  Hz, 1H), 7.60 (d,  $J = 8.4$  Hz, 1H), 7.55 (t,  $J = 7.7$  Hz, 1H), 7.49 (t,  $J = 7.5$  Hz, 1H), 6.55 (d,  $J = 46.2$  Hz, 1H);

$^{13}\text{C}\{^1\text{H}\}$  NMR (150 MHz, DMSO- $d_6$ )  $\delta$  176.07, 169.86 (d,  $J = 27.0$  Hz), 155.50, 153.66 (d,  $J = 1.5$  Hz), 136.30, 135.91 (d,  $J = 4.5$  Hz), 128.26, 126.50, 125.29, 124.98 (d,  $J = 21.0$  Hz), 124.68, 121.93, 121.36, 118.52, 84.72 (d,  $J = 21.0$  Hz);

$^{19}\text{F}$  NMR (565 MHz, DMSO- $d_6$ )  $\delta$  -176.66 (d,  $J = 50.9$  Hz).

HRMS (ESI-): calculated  $m/z$   $[\text{M-H}]^-$  for  $[\text{C}_{15}\text{H}_8\text{FO}_4]^-$ : 271.0401, found: 271.0410.

### 2-fluoro-2-(2-fluoro-[1,1'-biphenyl]-4-yl)acetic acid (28b)

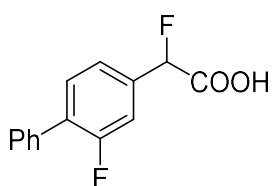

Following the general procedure, the optimized time is 24 h. Yield: 90% (22.3 mg); white solid; m.p. 165 – 170 °C.

$^1\text{H}$  NMR (600 MHz, DMSO- $d_6$ )  $\delta$  7.66 (t,  $J = 8.0$  Hz, 1H), 7.62 (d,  $J = 7.7$  Hz, 2H), 7.55 (t,  $J = 7.6$  Hz, 2H), 7.48 (t,  $J = 7.4$  Hz, 1H), 7.46 – 7.41 (m, 2H),

6.12 (d,  $J = 47.4$  Hz, 1H), 3.72 (s, 1H);

$^{13}\text{C}\{^1\text{H}\}$  NMR (150 MHz, DMSO- $d_6$ )  $\delta$  169.79 (d,  $J = 27.0$  Hz), 160.06, 158.43, 137.37, 137.32, 137.23, 137.19, 134.91, 131.72, 131.70, 129.54 (d,  $J = 13.5$  Hz), 129.28, 129.15, 128.64, 123.62, 123.59, 123.56, 114.99 (d,  $J = 6.0$  Hz), 88.36 (d,  $J = 180.0$  Hz);

$^{19}\text{F}$  NMR (565 MHz, DMSO- $d_6$ )  $\delta$  -117.64 (t,  $J = 11.3$  Hz), -177.36 (d,  $J = 50.9$  Hz).

HRMS (ESI-): calculated  $m/z$   $[\text{M-H}]^-$  for  $[\text{C}_{14}\text{H}_9\text{F}_2\text{O}_2]^-$ : 247.0565, found: 247.0571.

### 2-fluoro-2-(4-(((trifluoromethyl)sulfonyl)oxy)phenyl)propanoic acid (29b)

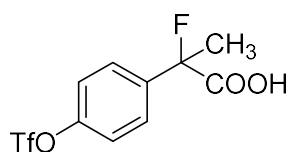

Following the general procedure, the optimized time is 24 h. Yield: 93% (29.4 mg); white solid; m.p. 132 – 138 °C.

$^1\text{H}$  NMR (600 MHz, Chloroform- $d$ )  $\delta$  7.64 (d,  $J = 8.9$  Hz, 2H), 7.49 (s, 1H), 7.31 (d,  $J = 8.9$  Hz, 2H), 1.97 (d,  $J = 22.2$  Hz, 3H);

$^{13}\text{C}\{^1\text{H}\}$  NMR (150 MHz,  $\text{CDCl}_3$ )  $\delta$  175.22 (d,  $J = 24.0$  Hz), 149.74, 138.88 (d,  $J = 22.5$  Hz), 127.00, 126.94, 121.90, 121.59, 119.77, 117.65, 115.52, 93.69 (d,  $J = 187.5$  Hz), 24.76 (d,  $J = 24.0$  Hz);

$^{19}\text{F}$  NMR (565 MHz,  $\text{CDCl}_3$ )  $\delta$  -72.82 (s, 1F), -152.48 (q,  $J = 22.6$  Hz).

HRMS (ESI-): calculated  $m/z$   $[\text{M-H}]^-$  for  $[\text{C}_{10}\text{H}_7\text{F}_4\text{O}_5\text{S}]^-$ : 314.9945, found: 314.9953.

### 2-fluoro-2-(4-isobutylphenyl)propanoic acid (30b)

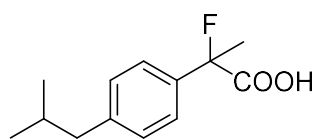

Following the general procedure, the optimized time is 24 h. Yield: 54% (12.2 mg); white solid; m.p. 70 – 76 °C

$^1\text{H NMR}$  (600 MHz, Chloroform-*d*)  $\delta$  8.30 (s, 1H), 7.42 (d,  $J = 8.2$  Hz, 2H), 7.17 (d,  $J = 8.1$  Hz, 2H), 2.48 (d,  $J = 7.2$  Hz, 2H), 1.95 (d,  $J = 22.2$  Hz, 3H), 1.86 (dq,  $J = 13.5$ , 6.7, 6.1 Hz, 1H), 0.90 (d,  $J = 6.6$  Hz, 6H);

$^{13}\text{C}\{^1\text{H}\}$  NMR (150 MHz,  $\text{CDCl}_3$ )  $\delta$  176.57 (d,  $J = 27.0$  Hz), 142.73, 135.58 (d,  $J = 22.5$  Hz), 129.33, 129.22, 124.56 (d,  $J = 7.5$  Hz), 94.84, 93.61, 45.03, 30.16, 24.40, 24.25, 22.38;

$^{19}\text{F NMR}$  (565 MHz,  $\text{CDCl}_3$ )  $\delta$  -150.42 (q,  $J = 22.6$  Hz).

**HRMS (ESI-):** calculated  $m/z$   $[\text{M-H}]^-$  for  $[\text{C}_{13}\text{H}_{16}\text{FO}_2]^-$ : 223.1129, found: 223.1134.

### 2-(3-benzoylphenyl)-2-fluoropropanoic acid (31b)

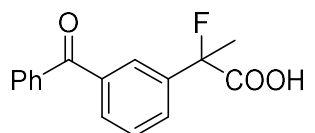

Following the general procedure, the optimized time is 24 h. Yield: 80% (21.8 mg); colorless oil.

$^1\text{H NMR}$  (600 MHz, DMSO-*d*)  $\delta$  7.92 (t,  $J = 1.9$  Hz, 1H), 7.71 (ddd,  $J = 9.5$ , 6.7, 3.0 Hz, 4H), 7.55 – 7.51 (m, 1H), 7.43 (dt,  $J = 22.3$ , 7.8 Hz, 3H), 6.05 (s, 1H), 1.92 (d,  $J = 22.3$  Hz, 3H);

$^{13}\text{C}\{^1\text{H}\}$  NMR (150 MHz, DMSO-*d*)  $\delta$  196.37, 174.85 (d,  $J = 28.5$  Hz), 138.97 (d,  $J = 28.5$  Hz), 137.90, 137.08, 132.85, 130.64, 130.16, 128.72 (d,  $J = 7.5$  Hz), 128.66, 128.45, 126.35 (d,  $J = 7.5$  Hz), 94.05 (d,  $J = 186.0$  Hz), 24.69, 24.54;

$^{19}\text{F NMR}$  (565 MHz, DMSO-*d*)  $\delta$  -151.98 (q,  $J = 22.6$  Hz).

**HRMS (ESI-):** calculated  $m/z$   $[\text{M-H}]^-$  for  $[\text{C}_{16}\text{H}_{12}\text{FO}_3]^-$ : 271.0765, found: 271.0773.

### 2-fluoro-2-(2-fluoro-[1,1'-biphenyl]-4-yl)propanoic acid (32b)

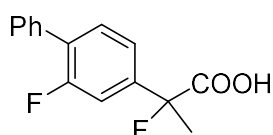

Following the general procedure, the optimized time is 24 h. Yield: 95% (24.9 mg); white solid; m.p. 98 – 107 °C.

$^1\text{H NMR}$  (600 MHz, Chloroform-*d*)  $\delta$  7.55 – 7.50 (m, 2H), 7.45 (dt,  $J = 11.7$ , 7.9 Hz, 3H), 7.41 – 7.33 (m, 3H), 1.98 (d,  $J = 22.1$  Hz, 3H);

$^{13}\text{C}\{^1\text{H}\}$  NMR (150 MHz,  $\text{CDCl}_3$ )  $\delta$  175.94, 159.59 (d,  $J = 247.5$  Hz), 139.78, 139.73, 139.62, 139.57, 134.98, 130.99 (d,  $J = 3.0$  Hz), 129.67 (d,  $J = 13.5$  Hz), 128.99, 128.97, 128.55, 128.04,

120.76, 120.74, 120.71, 120.68, 113.17, 113.12, 113.01, 112.94, 94.38, 93.13, 24.59 (d,  $J = 22.5$  Hz);

$^{19}\text{F}$  NMR (565 MHz,  $\text{CDCl}_3$ )  $\delta$  -116.50 (m, 1F), -151.59.

HRMS (ESI<sup>-</sup>): calculated  $m/z$   $[\text{M-H}]^-$  for  $[\text{C}_{15}\text{H}_{11}\text{F}_2\text{O}_2]^-$ : 261.0722, found: 261.0729.

### 2-fluoro-2-(3-phenoxyphenyl)propanoic acid (33b)

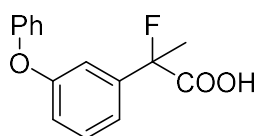

Following the general procedure, the optimized time is 24 h. Yield: 65% (16.9 mg); colorless oil.

$^1\text{H}$  NMR (600 MHz, Chloroform- $d$ )  $\delta$  7.29 – 7.24 (m, 3H), 7.19 – 7.17 (m, 1H), 7.15 (t,  $J = 2.1$  Hz, 1H), 7.05 (tt,  $J = 7.5, 1.2$  Hz, 1H), 6.98 – 6.92 (m, 2H), 6.89 (ddd,  $J = 8.2, 2.5, 1.0$  Hz, 1H), 1.86 (d,  $J = 22.3$  Hz, 3H);

$^{13}\text{C}\{^1\text{H}\}$  NMR (150 MHz,  $\text{CDCl}_3$ )  $\delta$  175.83 (d,  $J = 28.5$  Hz), 157.60, 156.64, 140.34 (d,  $J = 22.5$  Hz), 129.98, 129.90, 123.70, 119.41 (d,  $J = 9.0$  Hz), 119.12, 118.86, 115.40 (d,  $J = 9.0$  Hz), 94.47 (d,  $J = 186.0$  Hz), 24.60, 24.45;

$^{19}\text{F}$  NMR (565 MHz,  $\text{CDCl}_3$ )  $\delta$  -151.45 (q,  $J = 22.6$  Hz).

HRMS (ESI<sup>-</sup>): calculated  $m/z$   $[\text{M-H}]^-$  for  $[\text{C}_{15}\text{H}_{13}\text{FO}_3]^-$ : 259.0765, found: 259.0773.

### 2-fluoro-2-(4-((2-oxocyclopentyl)methyl)phenyl)propanoic acid (34b)

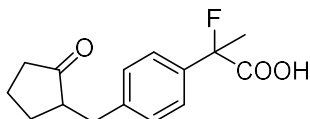

Following the general procedure, the optimized time is 24 h. Yield: 60% (15.8 mg); light yellow oil.

$^1\text{H}$  NMR (600 MHz, Chloroform- $d$ )  $\delta$  7.41 – 7.32 (m, 2H), 7.11 (d,  $J = 8.1$  Hz, 2H), 7.06 – 6.82 (m, 1H), 3.06 (dd,  $J = 14.0, 4.2$  Hz, 1H), 2.50 – 2.43 (m, 1H), 2.34 – 2.24 (m, 2H), 2.09 – 1.97 (m, 2H), 1.93 – 1.83 (m, 4H), 1.71 – 1.60 (m, 1H), 1.46 (dtd,  $J = 12.7, 11.0, 6.7$  Hz, 1H);

$^{13}\text{C}\{^1\text{H}\}$  NMR (150 MHz,  $\text{CDCl}_3$ )  $\delta$  175.54 (d,  $J = 28.5$  Hz), 140.89, 136.40 (d,  $J = 22.5$  Hz), 129.11, 124.92, 124.87, 94.22 (d,  $J = 184.5$  Hz), 50.94, 38.19, 35.15, 29.17, 24.48, 24.46, 24.32, 24.30, 20.52;

$^{19}\text{F}$  NMR (565 MHz,  $\text{CDCl}_3$ )  $\delta$  -150.62 (m, 1F).

HRMS (ESI<sup>-</sup>): calculated  $m/z$   $[\text{M-H}]^-$  for  $[\text{C}_{15}\text{H}_{16}\text{FO}_3]^-$ : 263.1078, found: 263.1086.

### N-(2-bromophenyl)-2-(4-bromophenyl)-2-fluoroacetamide (35)

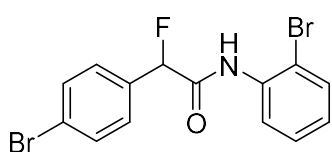

Following the reported procedure,<sup>8</sup> the reaction time is 24 h. Yield: 72% (14.8 mg); white solid; m.p. 121 – 129 °C.

<sup>1</sup>H NMR (600 MHz, Chloroform-*d*) δ 8.76 (s, 1H), 8.33 (ddd, *J* = 8.2, 4.1, 1.6 Hz, 1H), 7.58 (dddd, *J* = 7.0, 5.2, 4.0, 1.2 Hz, 3H), 7.47 – 7.38 (m, 2H), 7.33 (tdd, *J* = 8.3, 4.1, 1.5 Hz, 1H), 7.04 (dddd, *J* = 7.8, 6.2, 4.1, 2.1 Hz, 1H), 5.89 (dd, *J* = 48.0, 3.8 Hz, 1H);  
<sup>13</sup>C{<sup>1</sup>H} NMR (150 MHz, CDCl<sub>3</sub>) δ 166.06 (d, *J* = 21.0 Hz), 134.44, 133.27 (d, *J* = 21.0 Hz), 132.47, 132.04, 128.51, 128.15 (d, *J* = 7.5 Hz), 126.12, 124.00, 121.87, 113.97, 91.25 (d, *J* = 190.5 Hz);  
<sup>19</sup>F NMR (565 MHz, CDCl<sub>3</sub>) δ -178.19 (m, 1F).

HRMS (ESI<sup>-</sup>): calculated *m/z* [M-H]<sup>-</sup> for [C<sub>14</sub>H<sub>9</sub>Br<sub>2</sub><sup>79</sup>FNO]<sup>-</sup>: 383.9029, found: 383.9039; [C<sub>8</sub>H<sub>5</sub>Br<sup>81</sup>FO<sub>2</sub>]<sup>-</sup>: 385.9009, found: 385.9019.

### 2-(4-bromophenyl)-2-fluoroethan-1-ol (36)

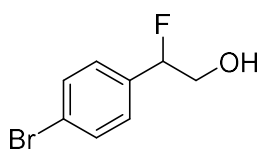

Following the reported procedure,<sup>9</sup> the reaction time is 24 h. Yield: 79% (14.8 mg); colorless oil.

<sup>1</sup>H NMR (600 MHz, Chloroform-*d*) δ 7.45 (d, *J* = 8.2 Hz, 2H), 7.14 (d, *J* = 8.3 Hz, 2H), 5.44 (ddd, *J* = 48.3, 7.5, 3.1 Hz, 1H), 3.84 – 3.65 (m, 2H), 2.24 (s, 1H).  
<sup>13</sup>C{<sup>1</sup>H} NMR (150 MHz, CDCl<sub>3</sub>) δ 135.48, 135.35, 131.80, 127.45, 127.41, 122.85, 94.74, 93.59, 66.37, 66.21.  
<sup>19</sup>F NMR (565 MHz, CDCl<sub>3</sub>) δ -187.48 (m, 1F).

HRMS (ESI<sup>-</sup>): calculated *m/z* [M-H]<sup>-</sup> for [C<sub>8</sub>H<sub>7</sub>Br<sup>79</sup>FO]<sup>-</sup>: 216.9659, found: 216.9660; [C<sub>8</sub>H<sub>5</sub>Br<sup>81</sup>FO<sub>2</sub>]<sup>-</sup>: 218.9638, found: 218.9643.

## 8. Reference

1. X. P. Yin, Z. Li, M. Aliakbar, R. C. Brian, W. D. Wulff, *J. Org. Chem.*, **2020**, *85*, 10432.
2. D. R. Magnin, R. B. Sulsky, J. A. Rob; T. J. Caulfield, R. A. Parker. US 20030225091A1.
3. G. Lyne; G. Brigitte, WO2016054728A1.
4. J. A. Blake, E. Gagnon, M. Lukeman, J. C. Scaiano, *Org. Lett.*, **2006**, *8*, 1057.

5. L. Aureli, G. Cruciani, M. C. Cesta, R. Anacardio, L. De Simone, A. Moriconi, *J. Med. Chem.*, **2005**, *48*, 2469.
6. C. C. Li, P. Zhao, R. L. Li, B. Zhang, W. X. Zhao, *Angew. Chem., Int. Ed.*, **2020**, *59*, 10913.
7. T. Knauber, F. Arikian, G. Röschenthaler, L. J. Gooßen, *Chem. Eur. J.*, **2011**, *17*, 2689.
8. L. L. Wu, L. Falivene, E. Drinkel, S. Grant, A. Linden, L. Cavallo, R. Dorta, *Angew. Chem., Int. Ed.*, **2012**, *51*, 2870.
9. M. J. Maclean, S. Walker, T. F. Wang, P. C. H. Eichinger, P. J. Shermana, J. H. Bowie, *Org. Biomol. Chem.*, **2010**, *8*, 371.



# 9. Copy of $^1\text{H}$ , $^{13}\text{C}\{^1\text{H}\}$ and $^{19}\text{F}$ NMR Spectra.

## Compound 1b

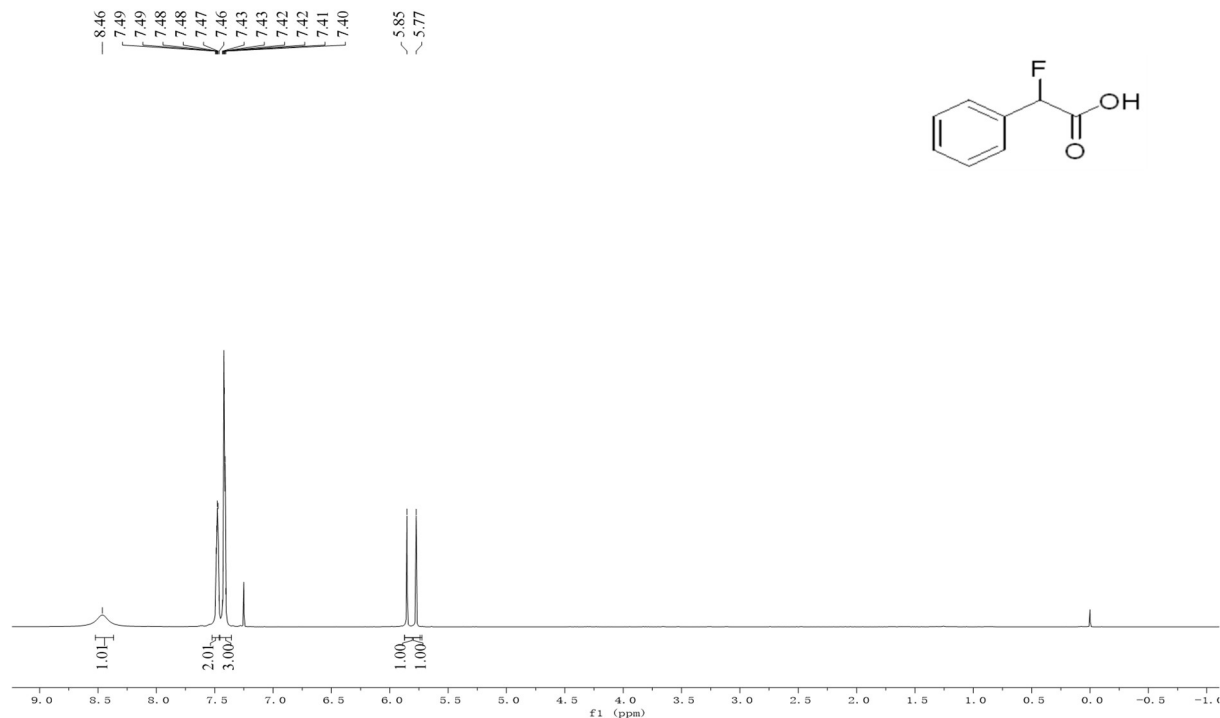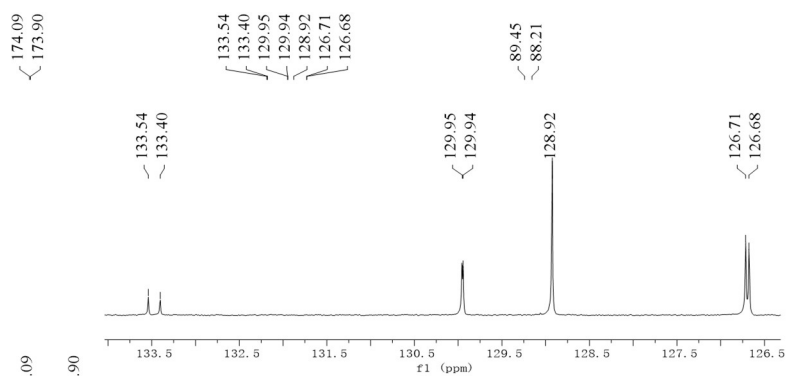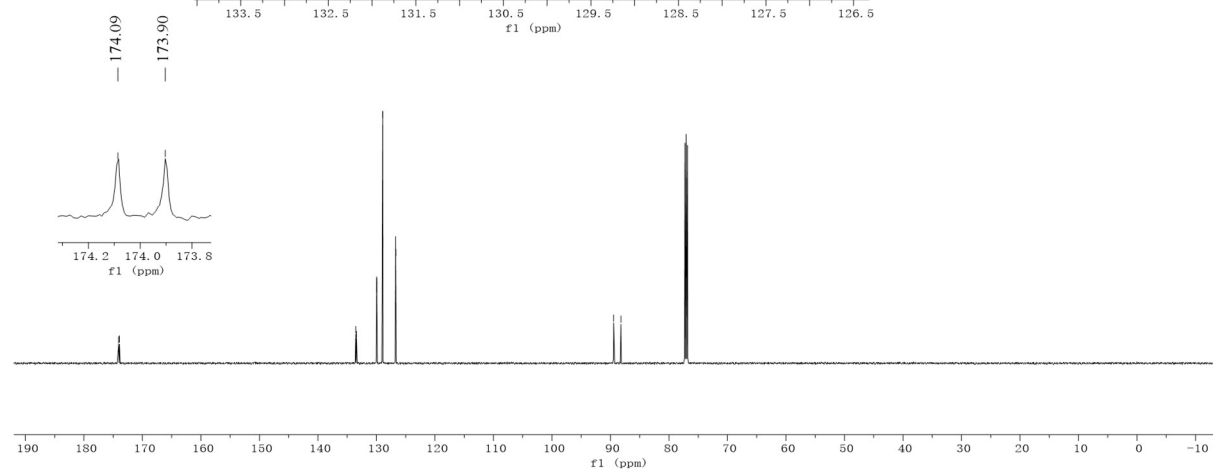

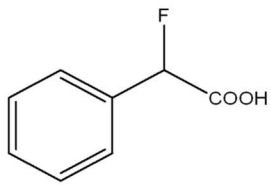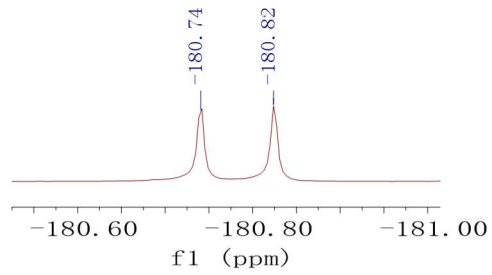

-180.74  
-180.82

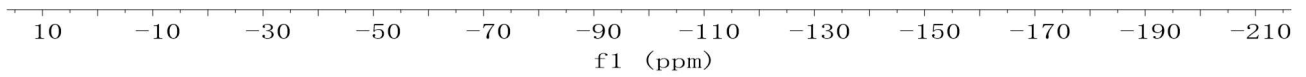

### Compound 2b

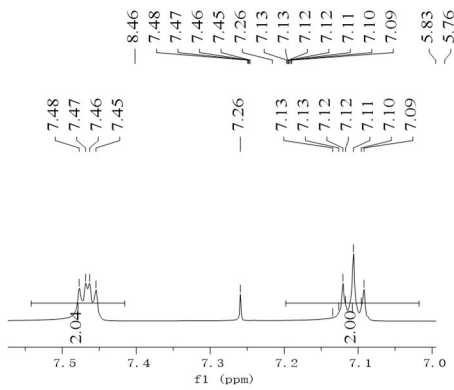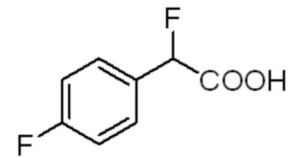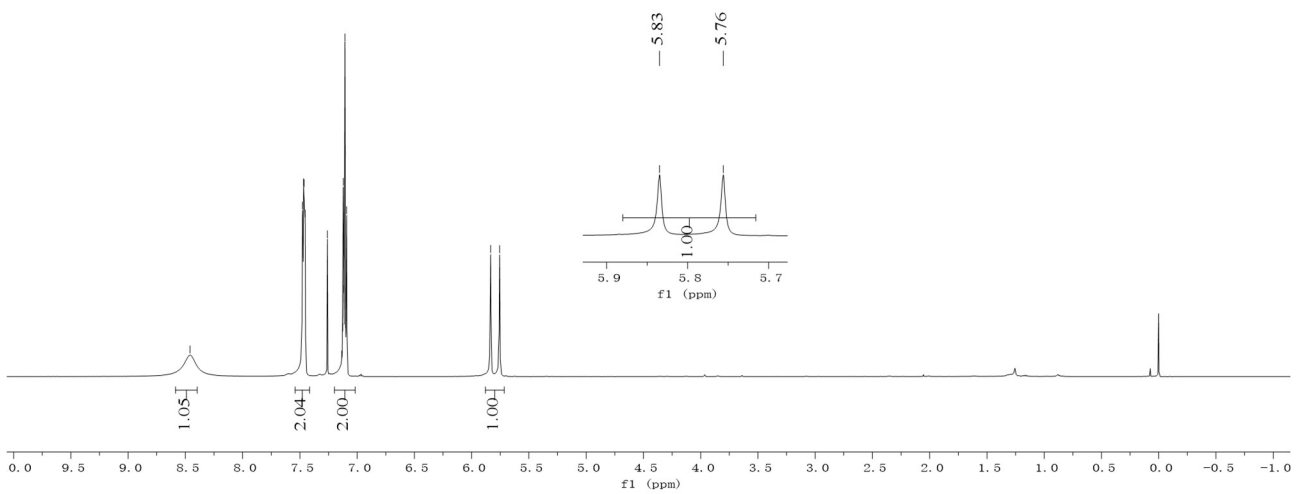

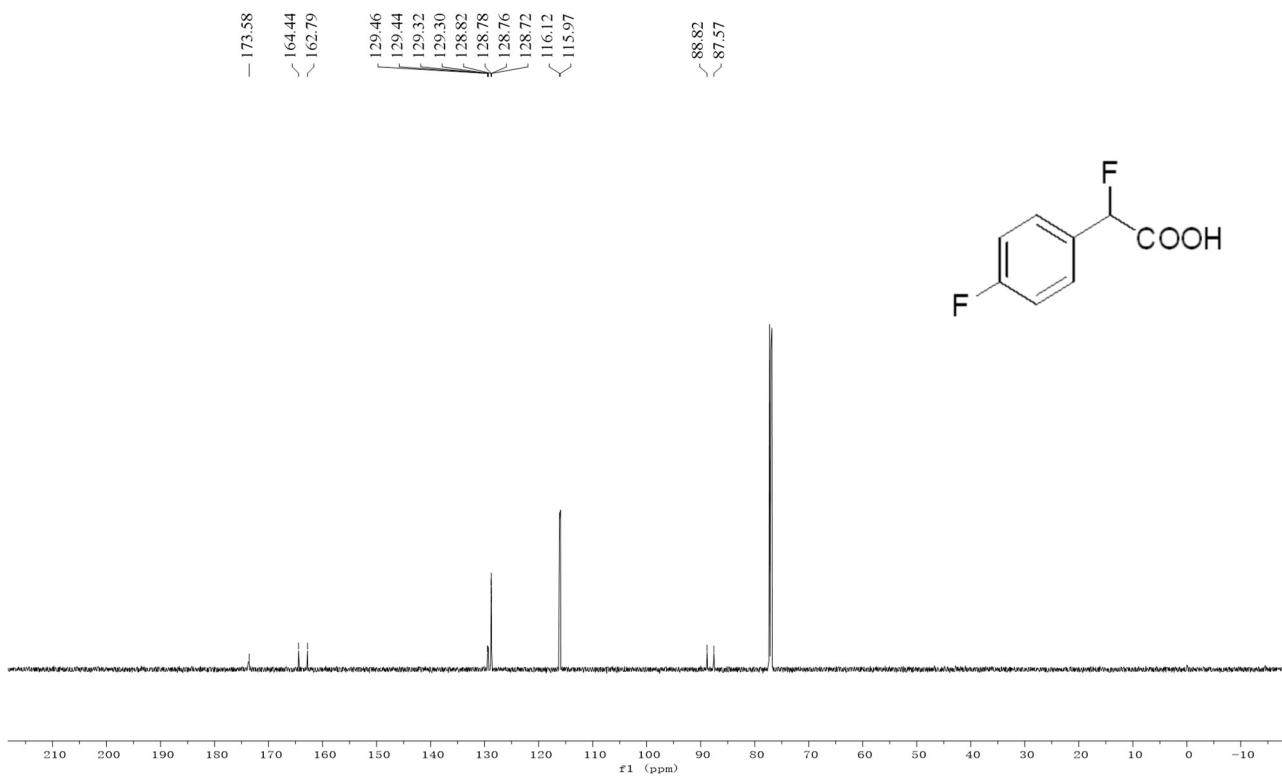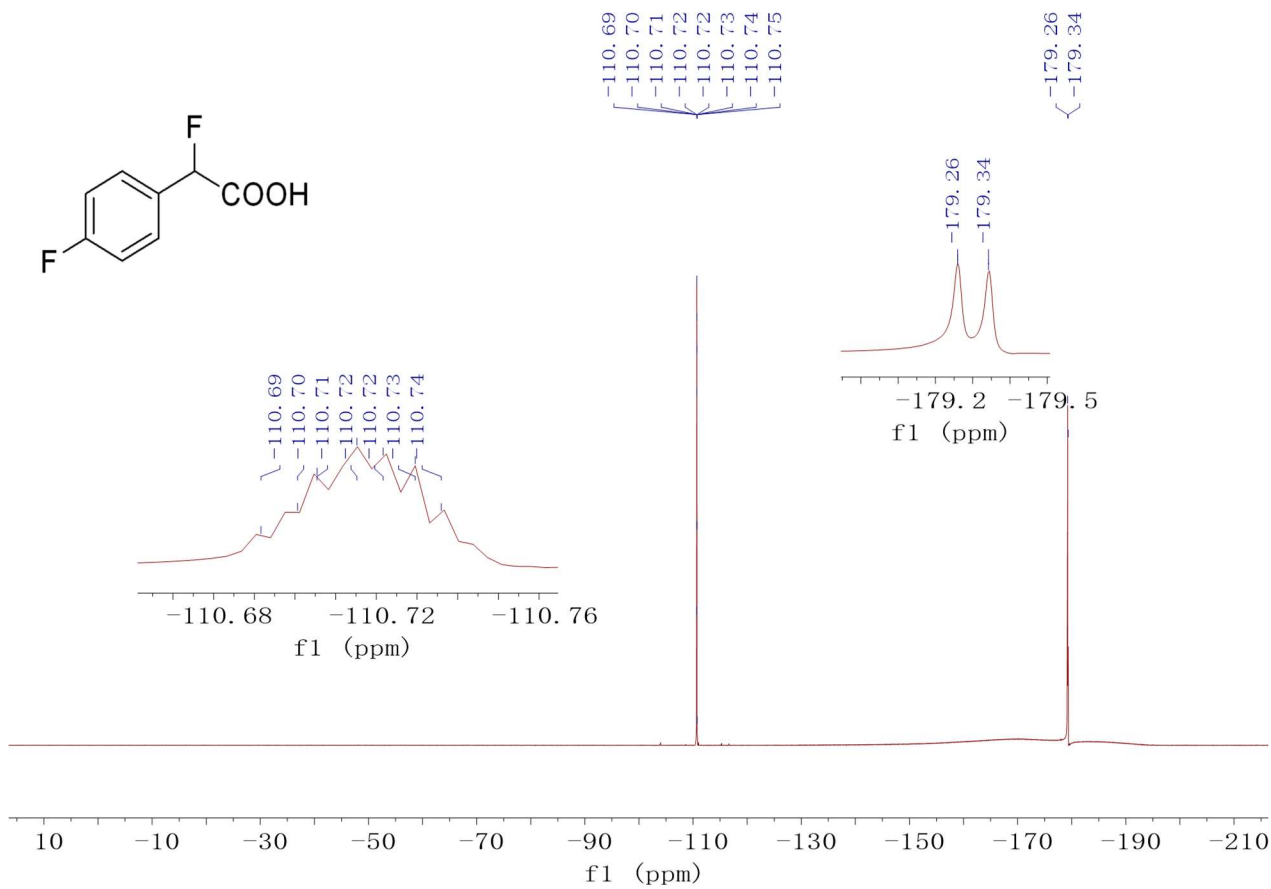

# Compound 3b

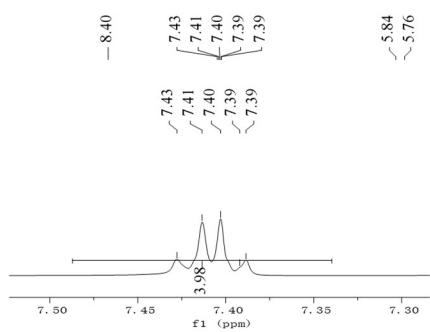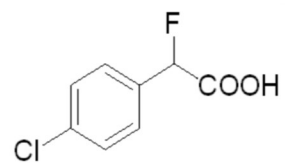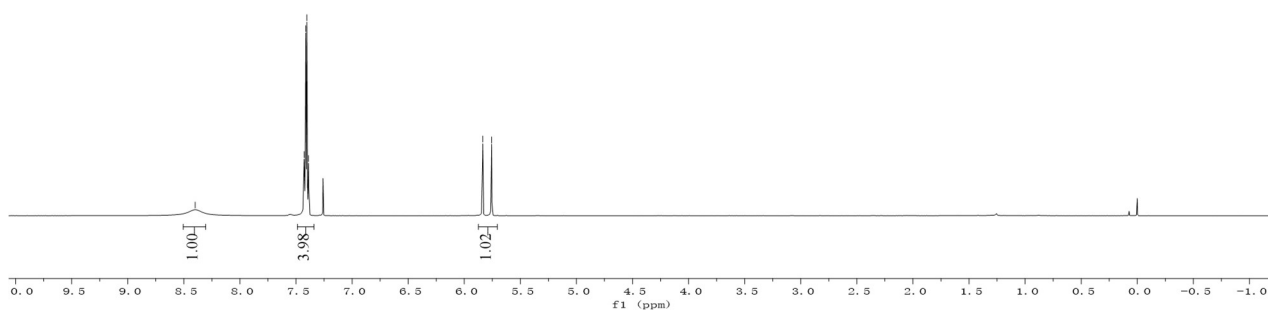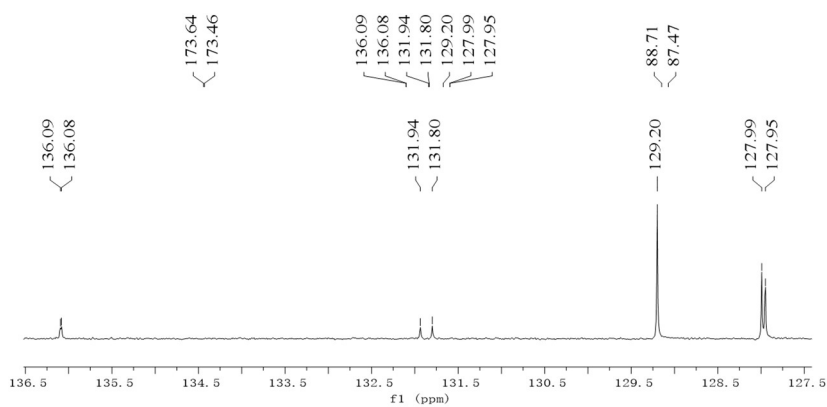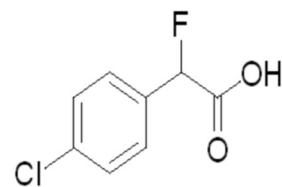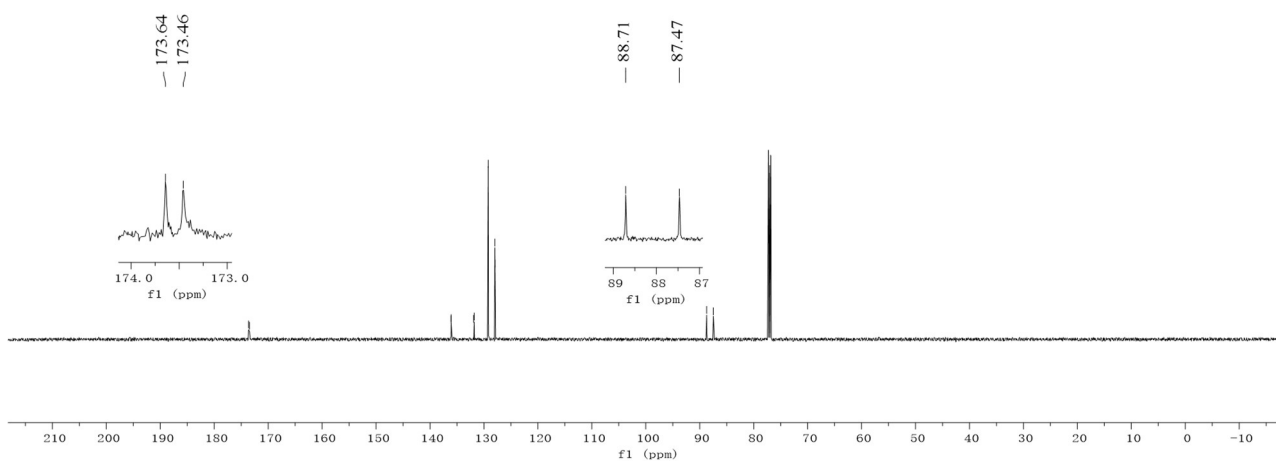

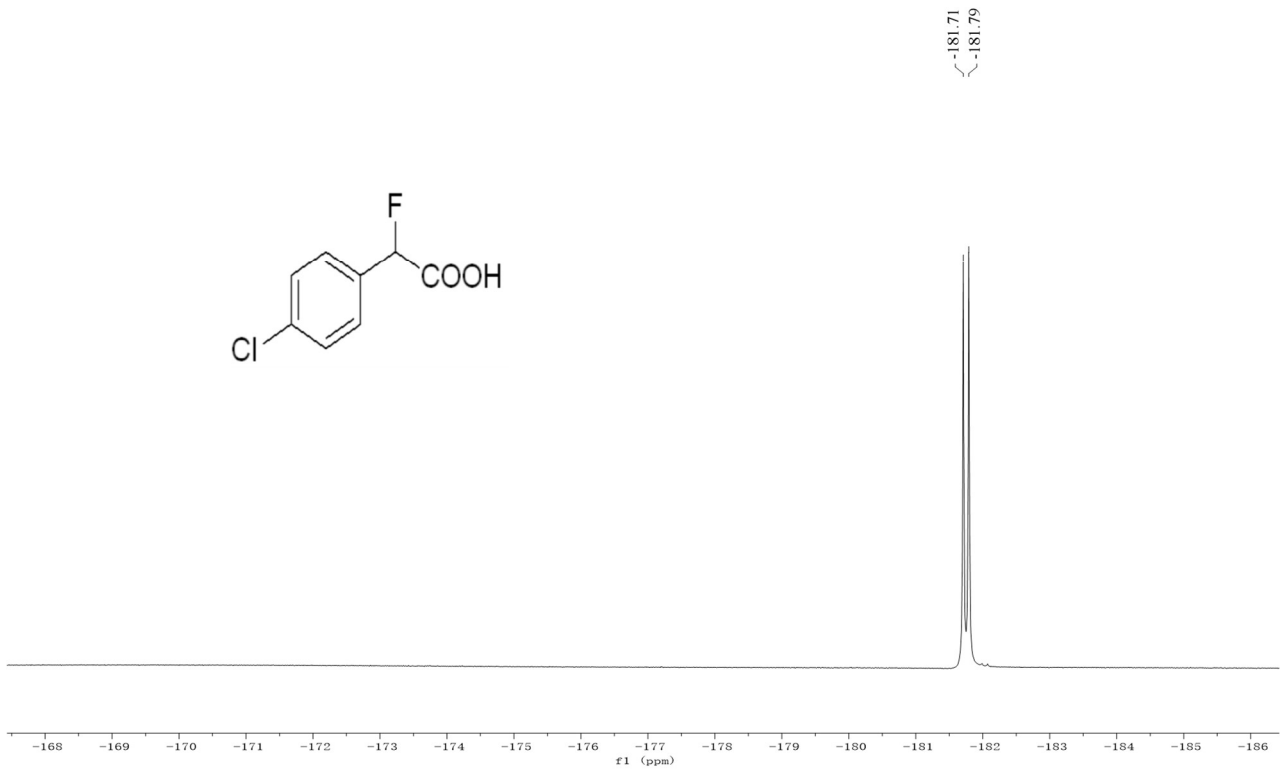

**Compound 4b**

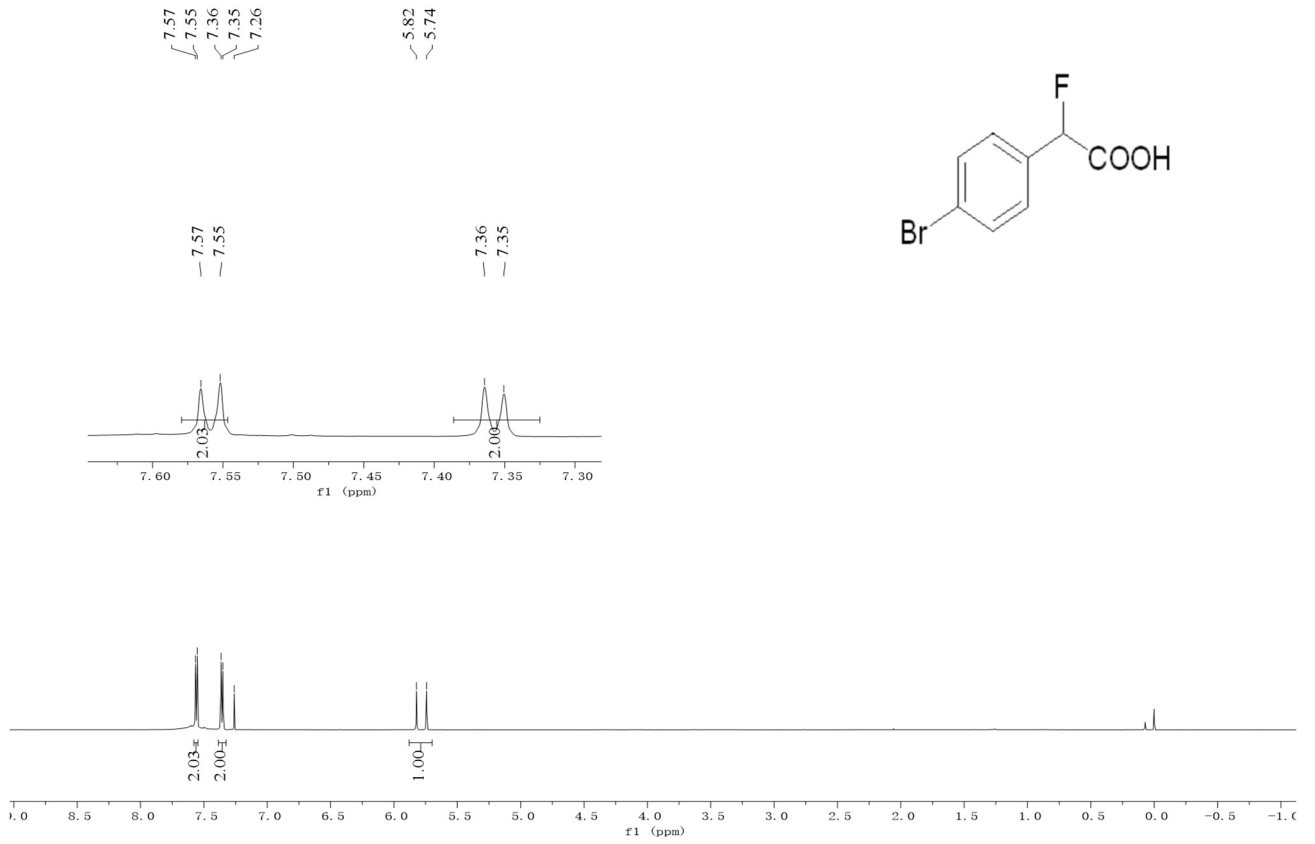

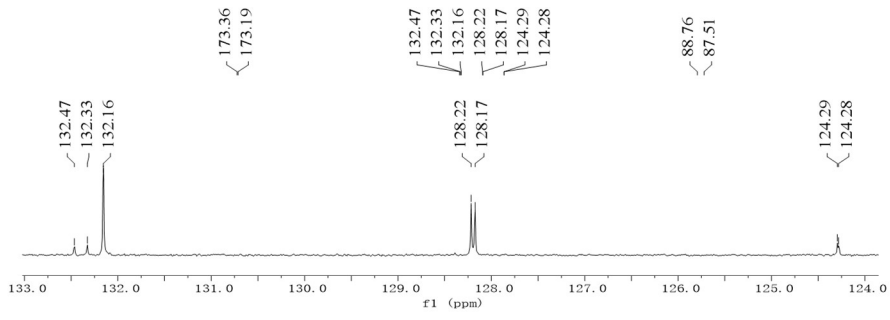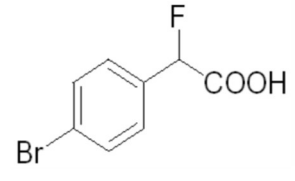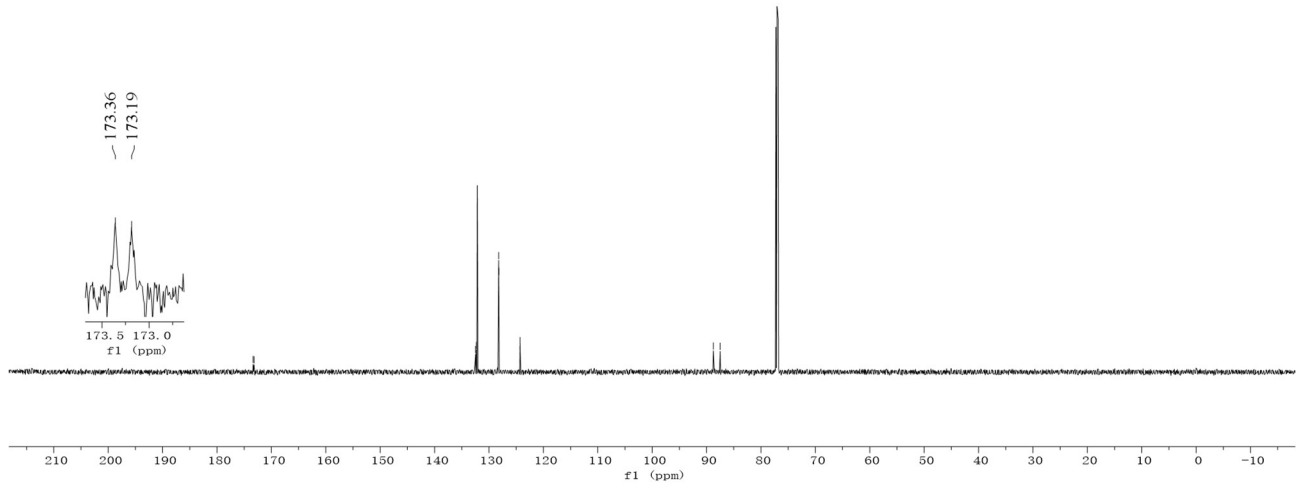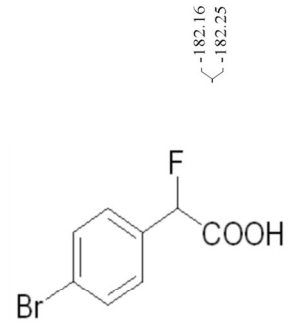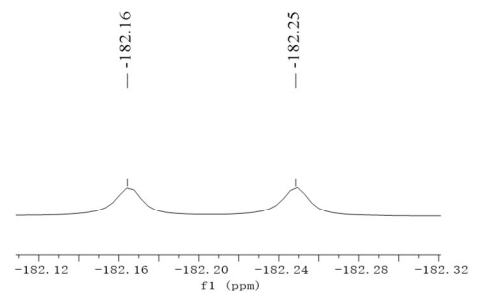

-182.16  
-182.25

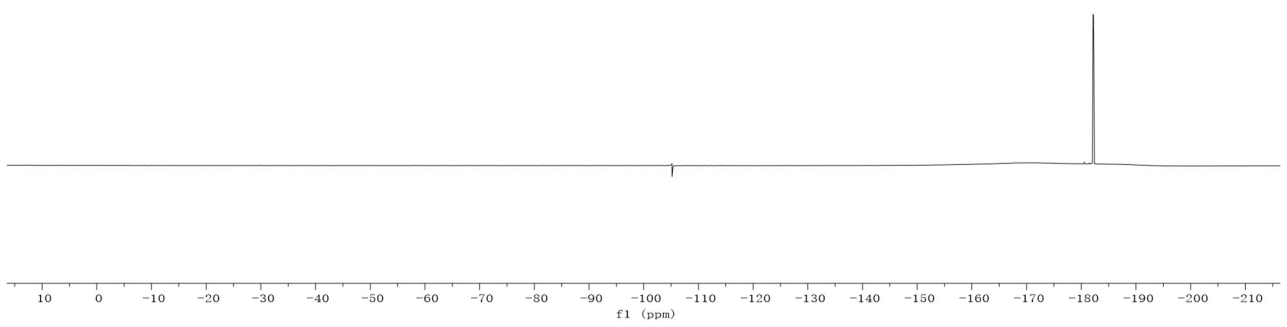

# Compound 5b

7.77  
7.76  
7.23  
7.22

6.09  
5.81  
5.73

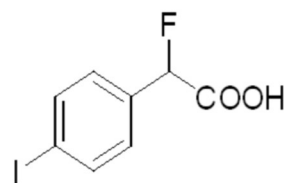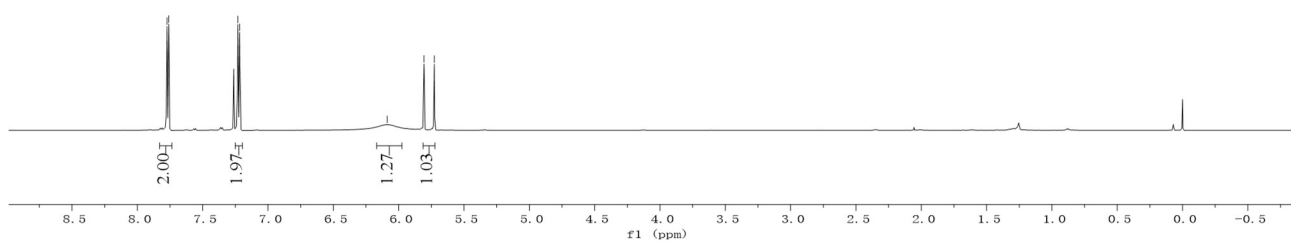

172.91  
172.73

138.09  
133.16  
133.03  
128.29  
128.25

96.11  
88.86  
87.61

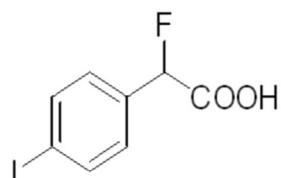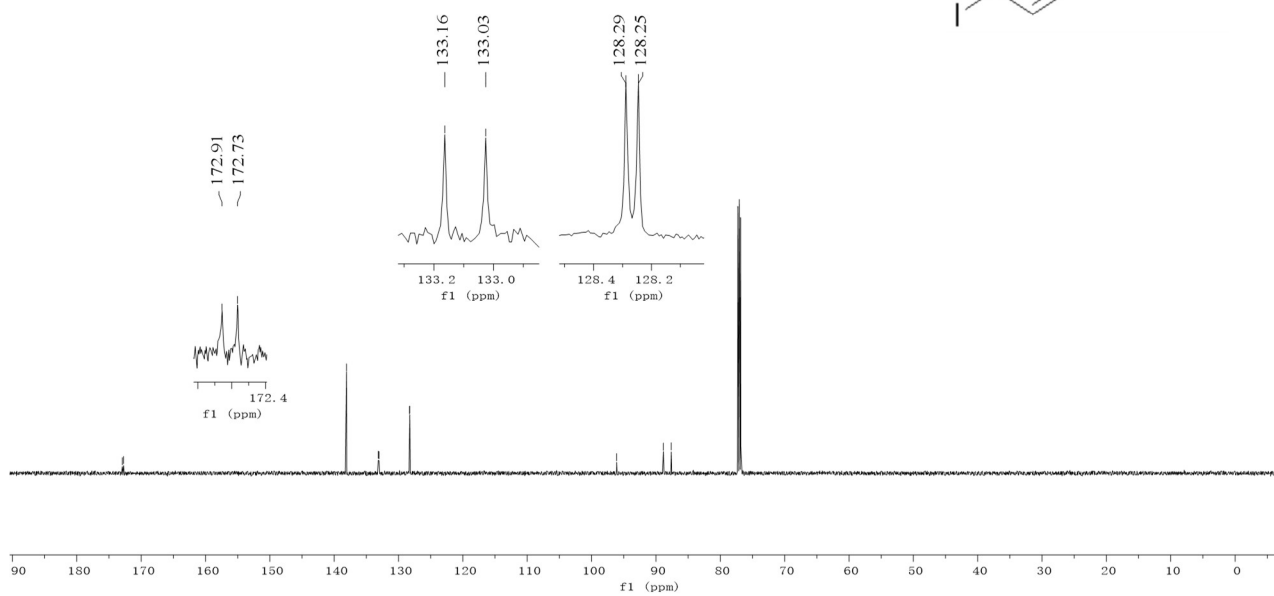

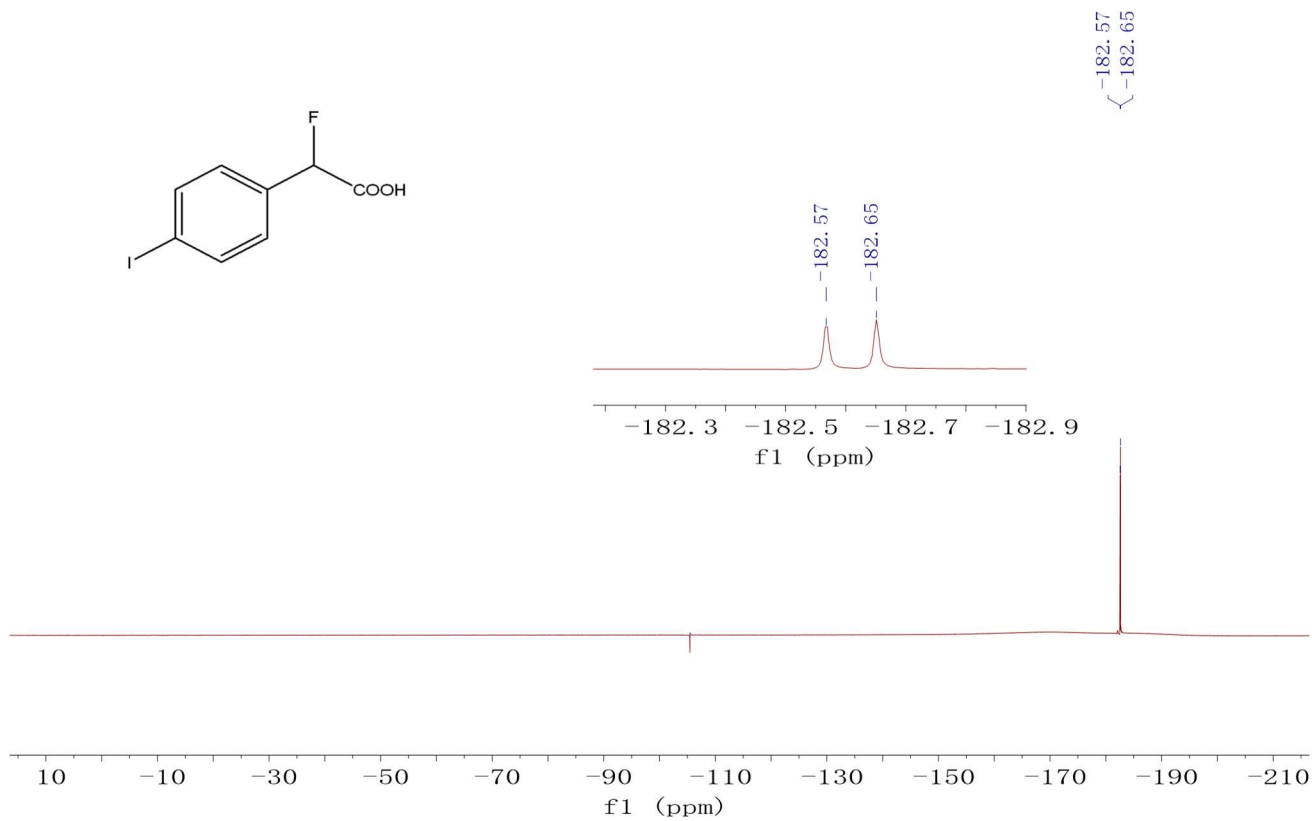

**Compound 6b**

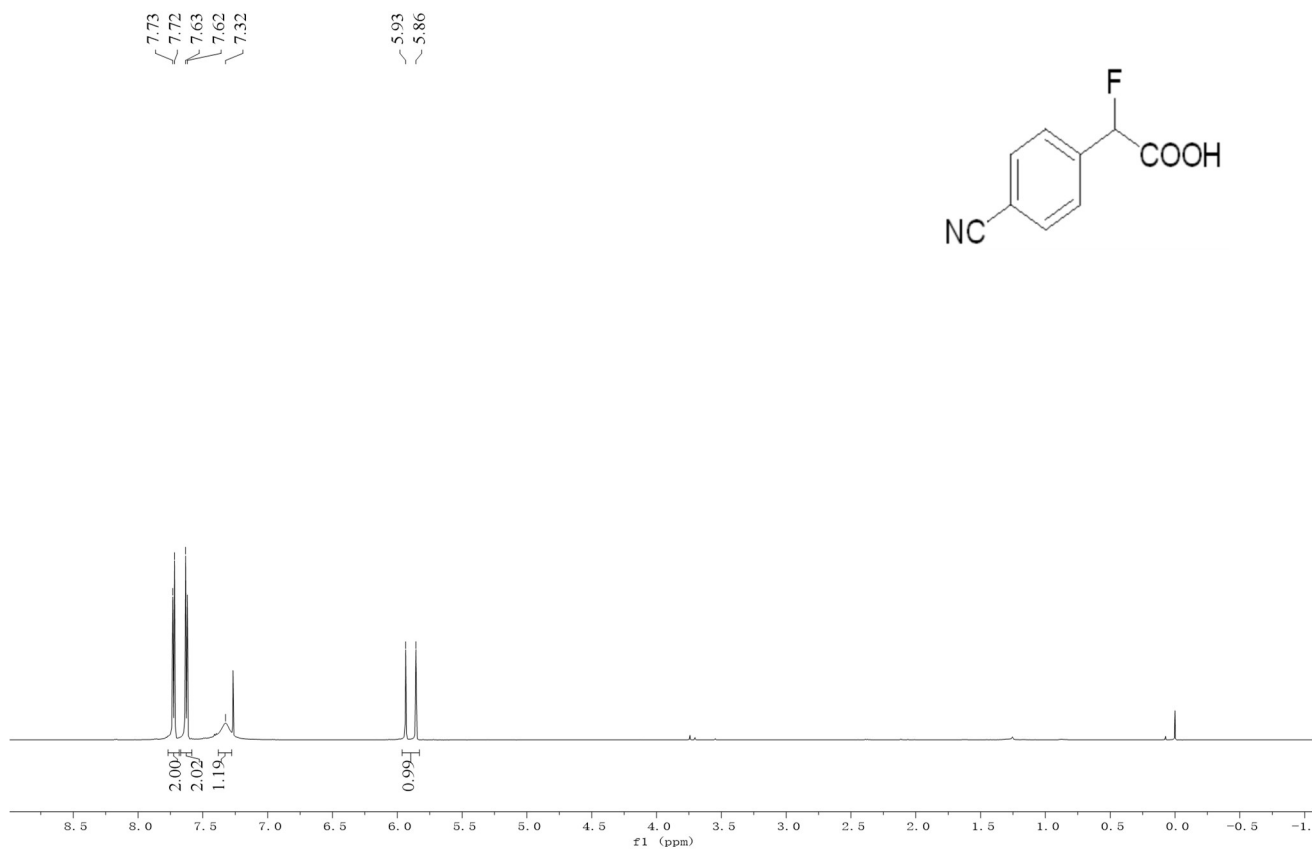



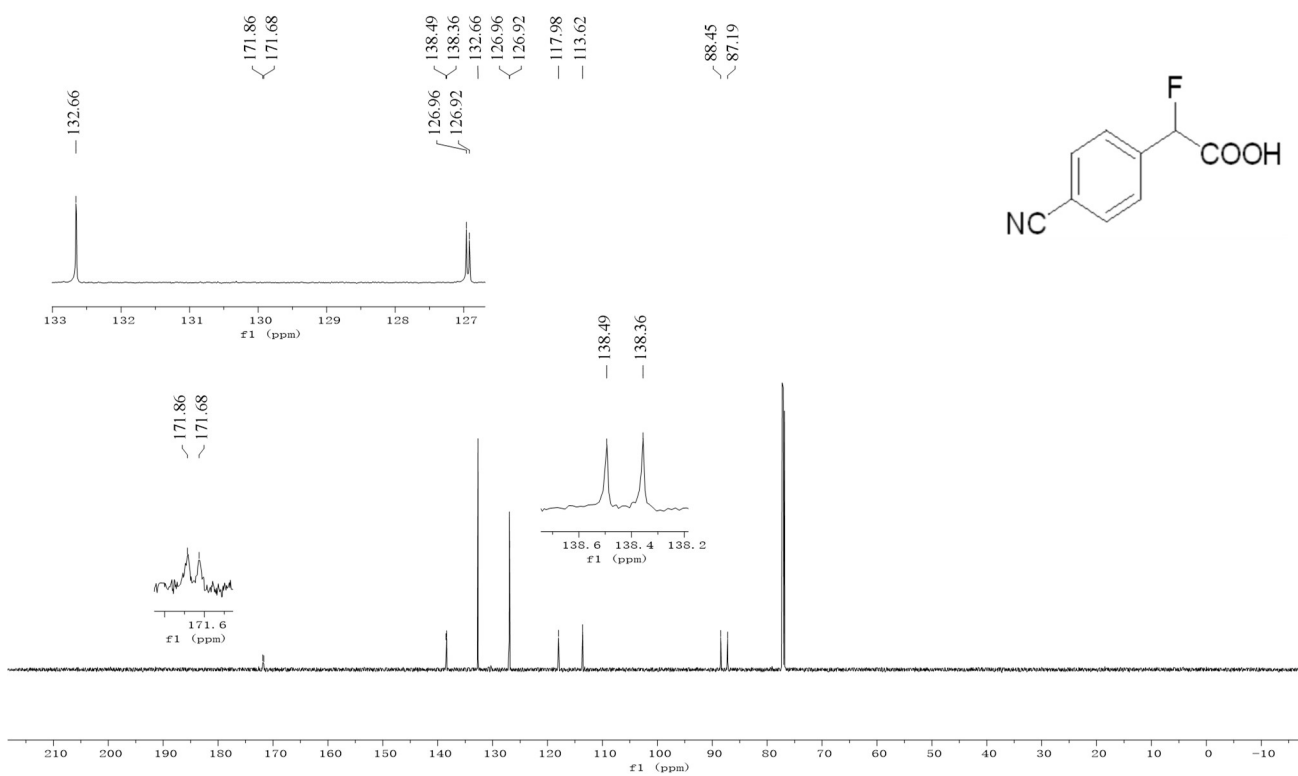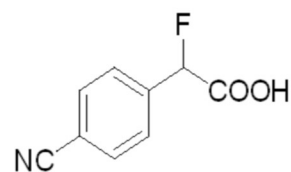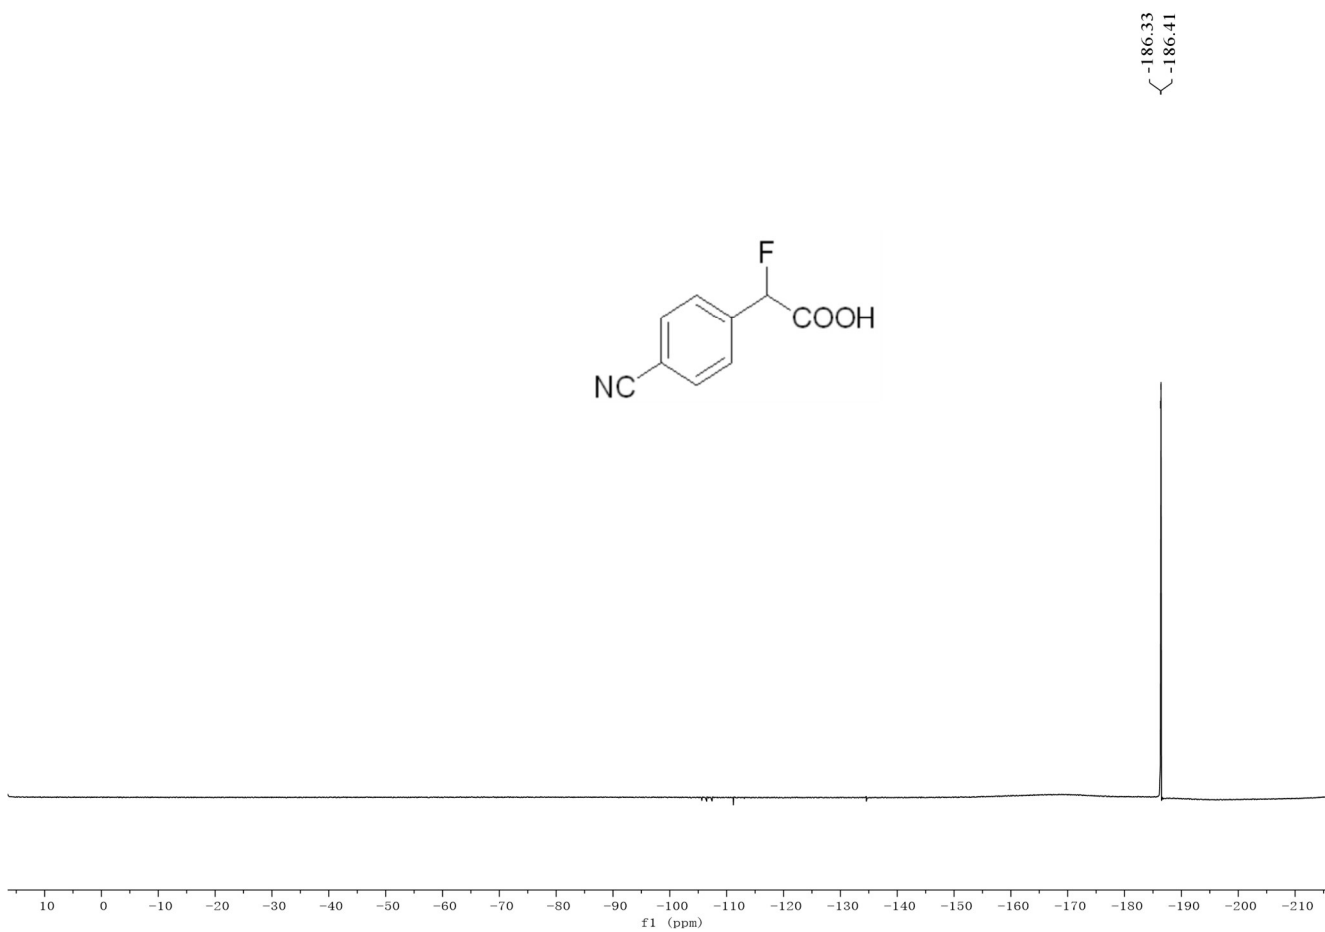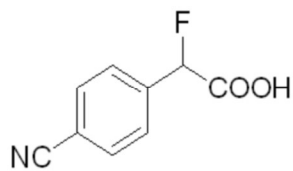

# Compound 7b

8.01  
7.69  
7.68  
7.63  
7.61

5.93  
5.86

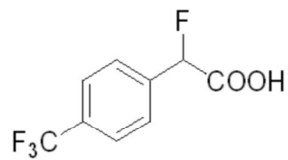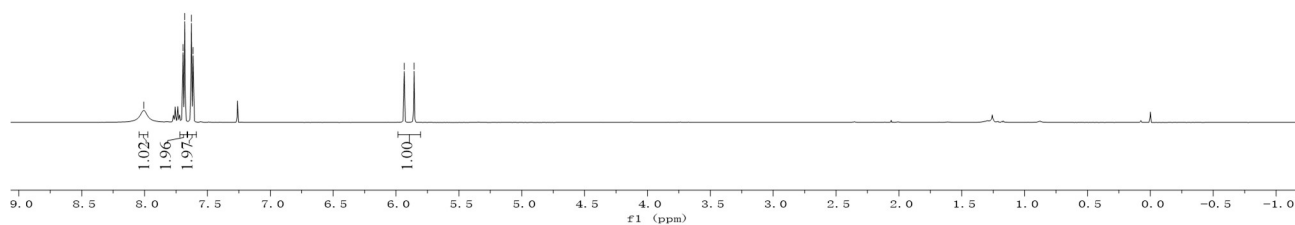

173.10  
172.92

137.22  
137.08  
132.12  
131.91  
126.76  
126.72  
126.27  
125.94  
125.91  
125.89  
125.86  
125.82  
124.58  
122.78

88.63  
87.38

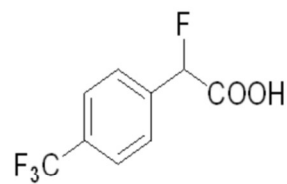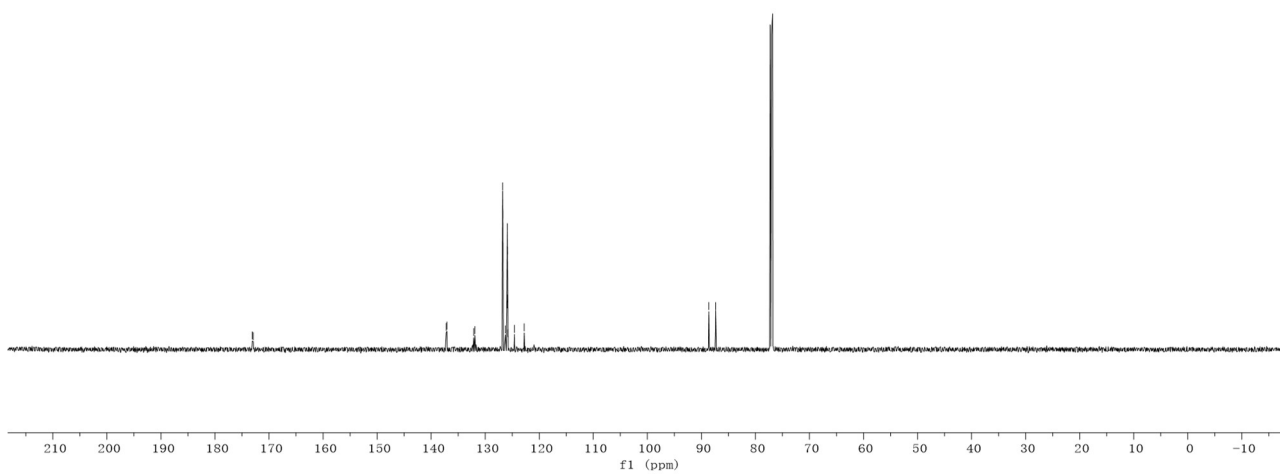

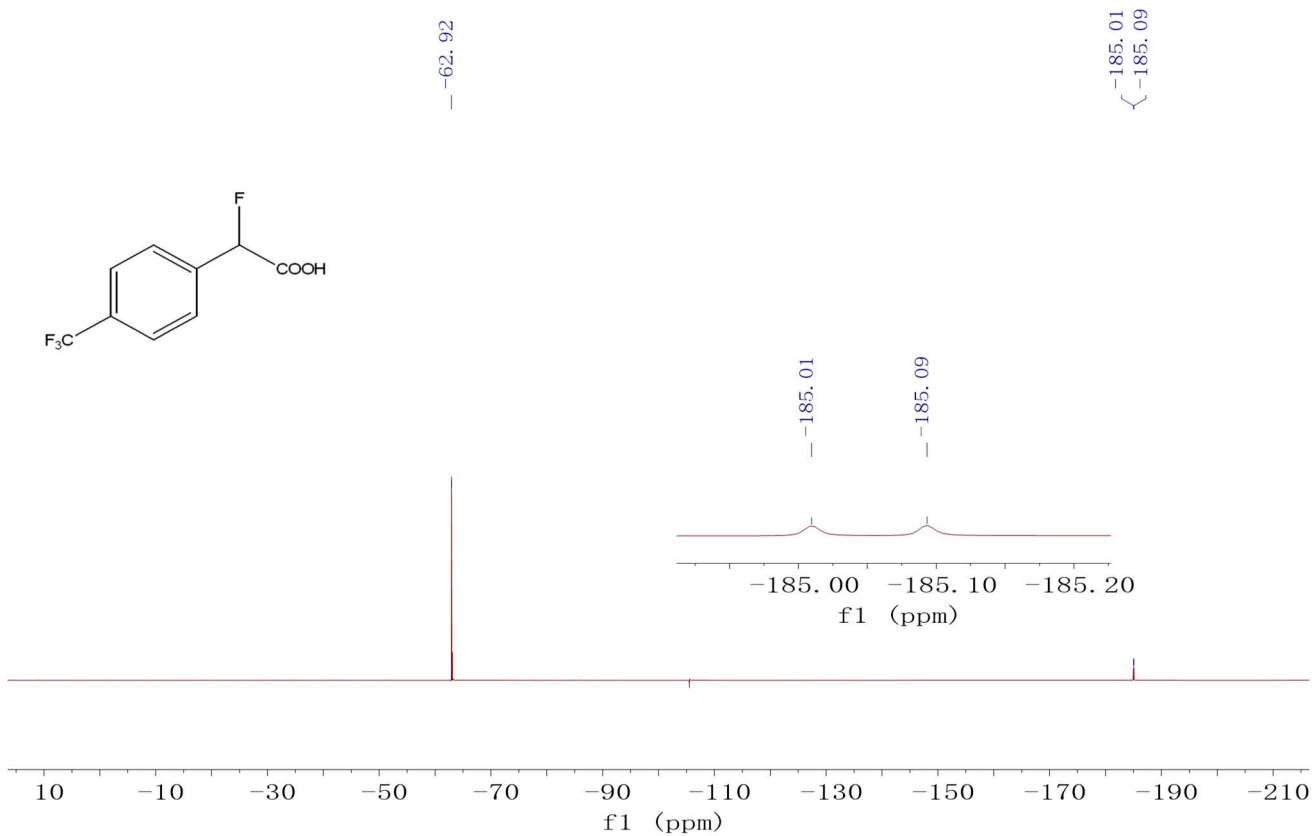

**Compound 8b**

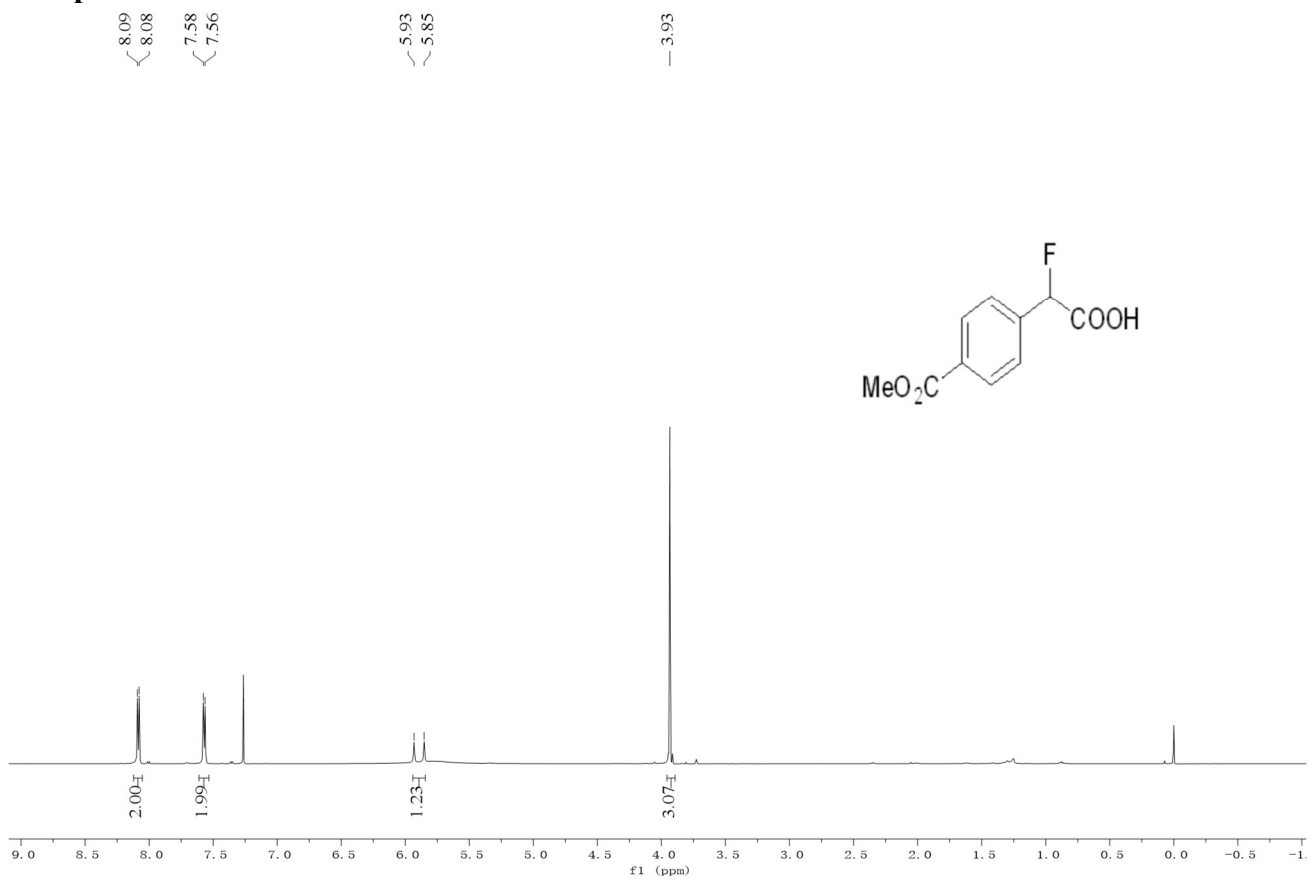

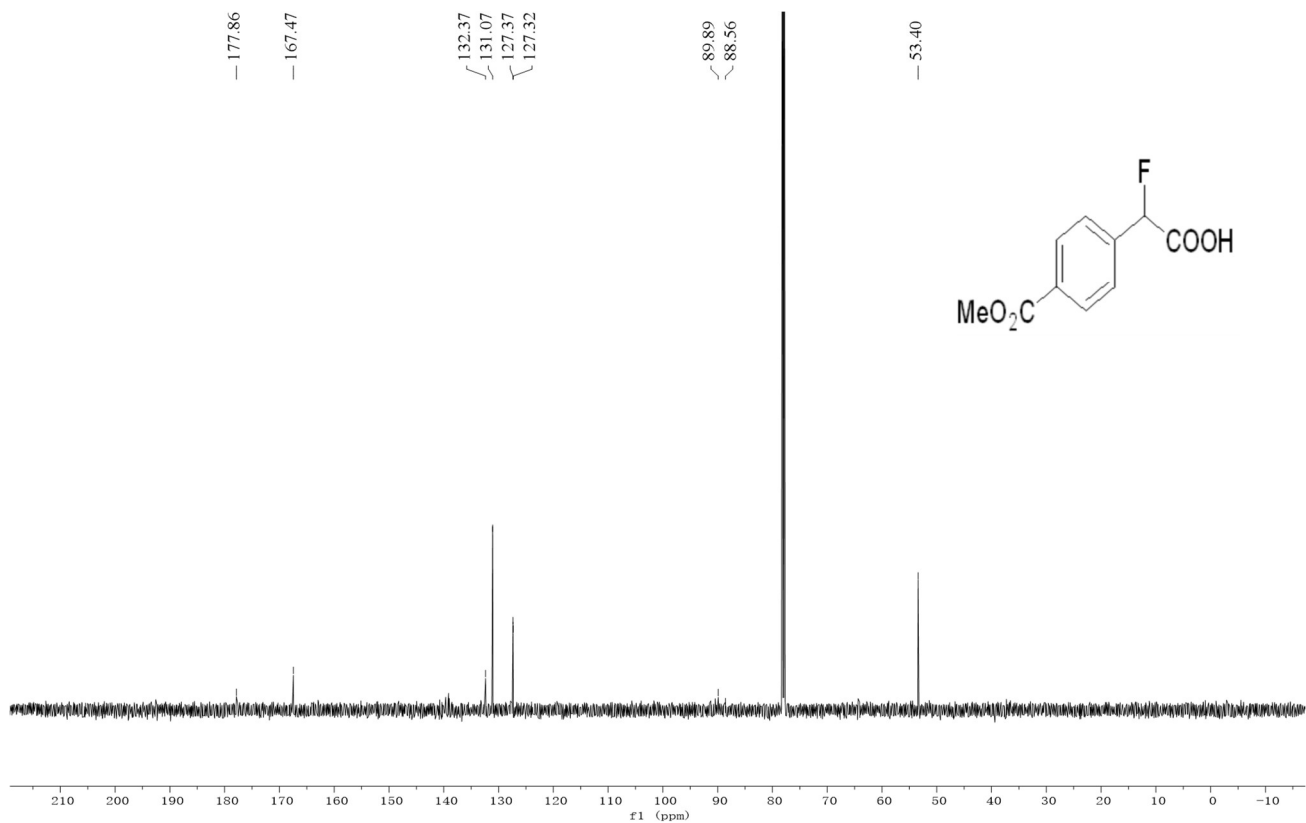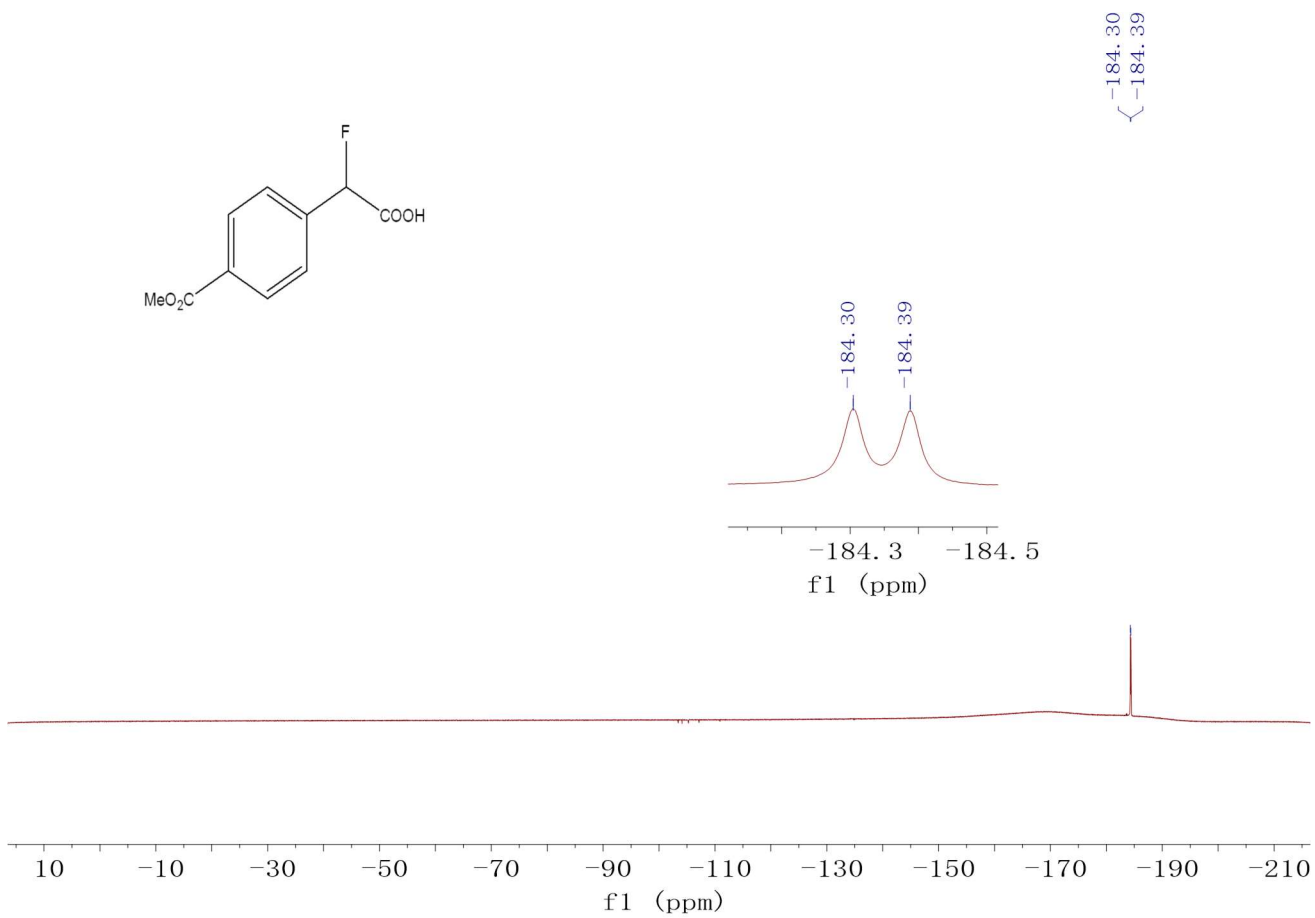

# Compound 9b

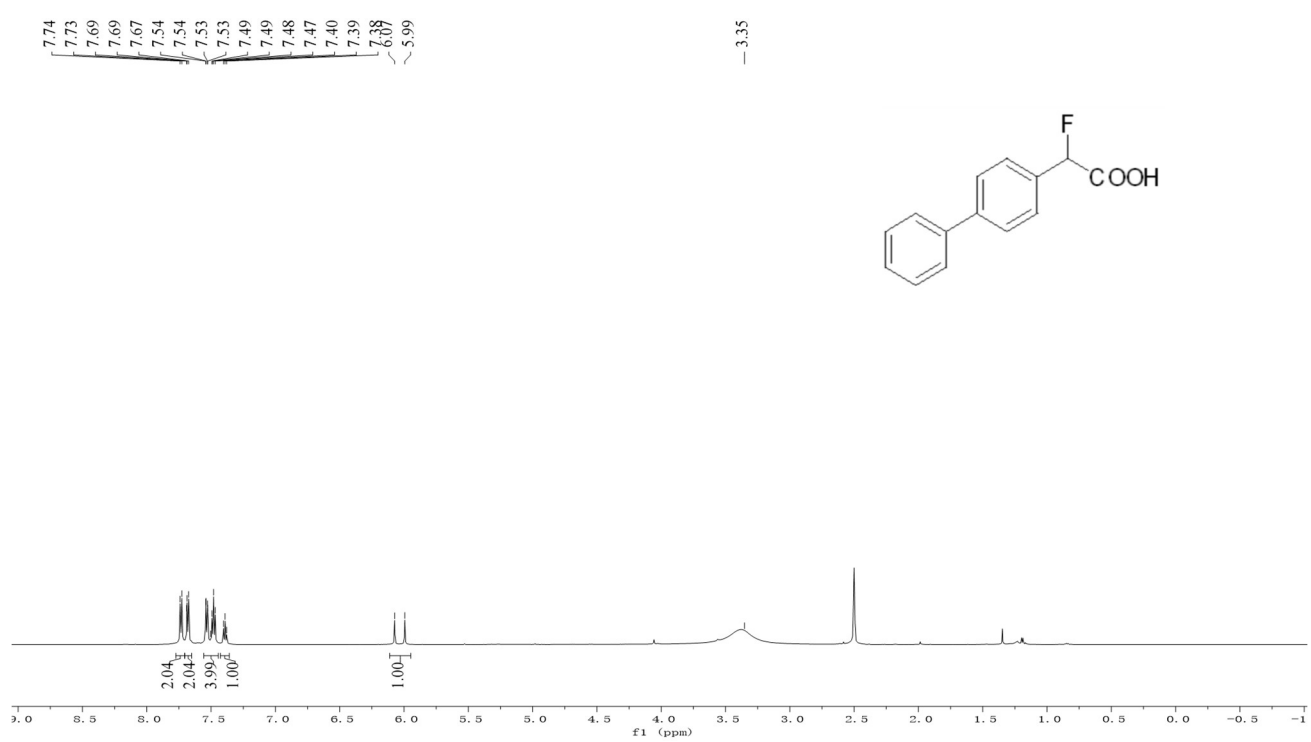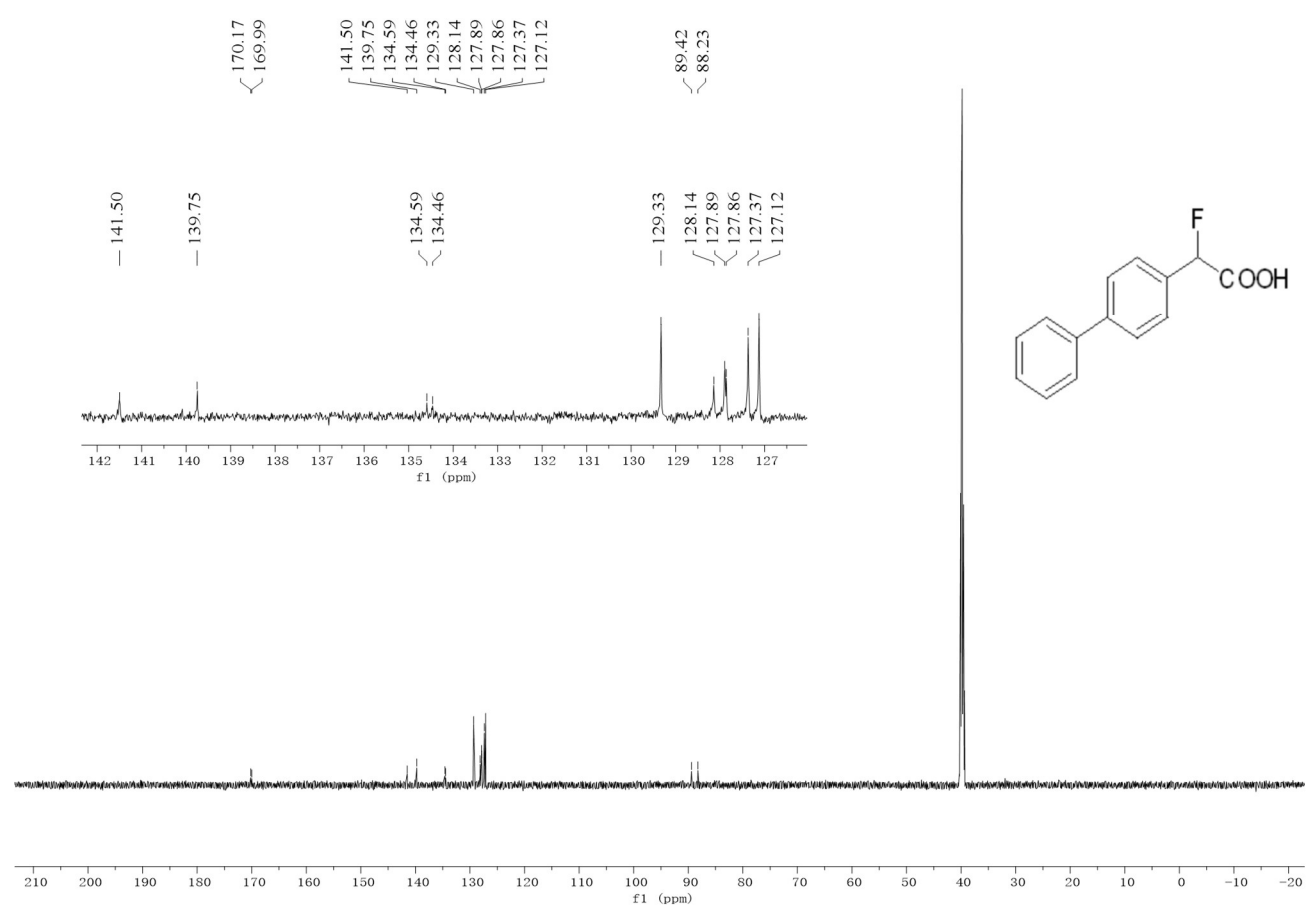

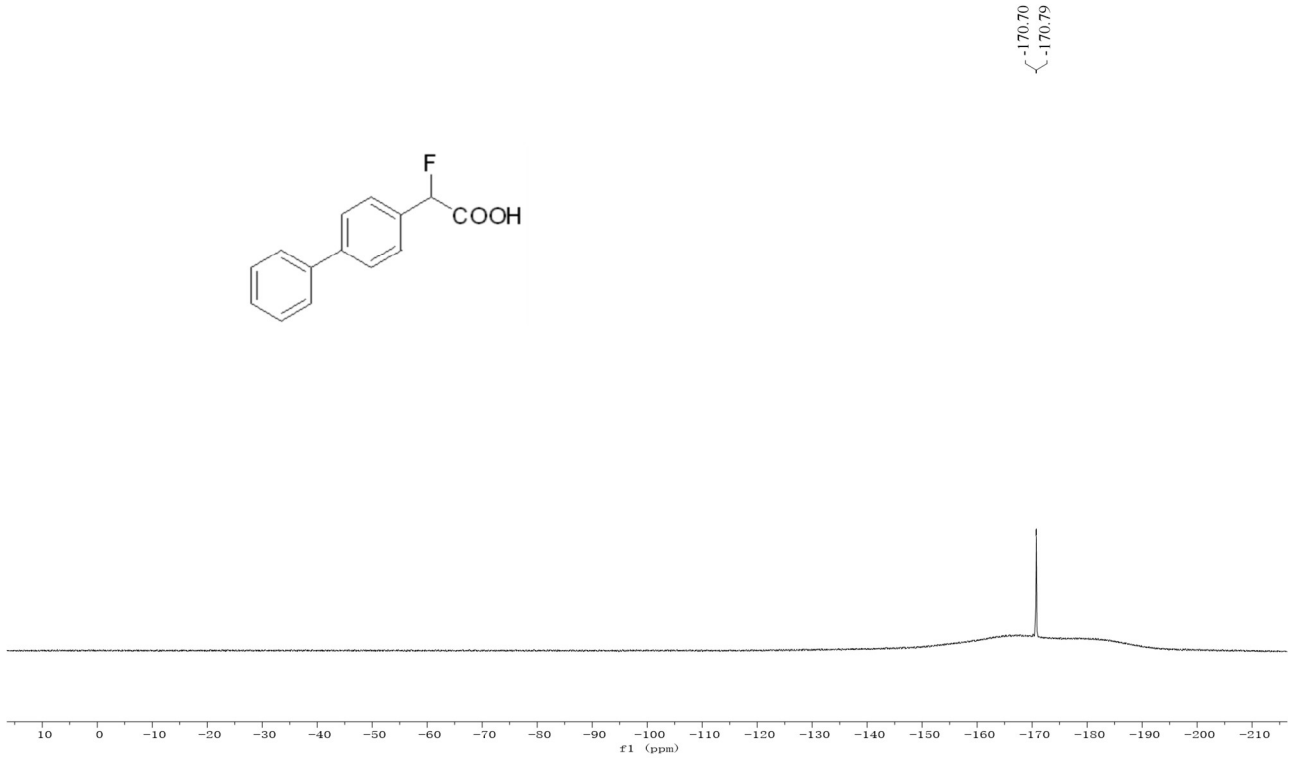

### Compound 10b

WCL-320.10

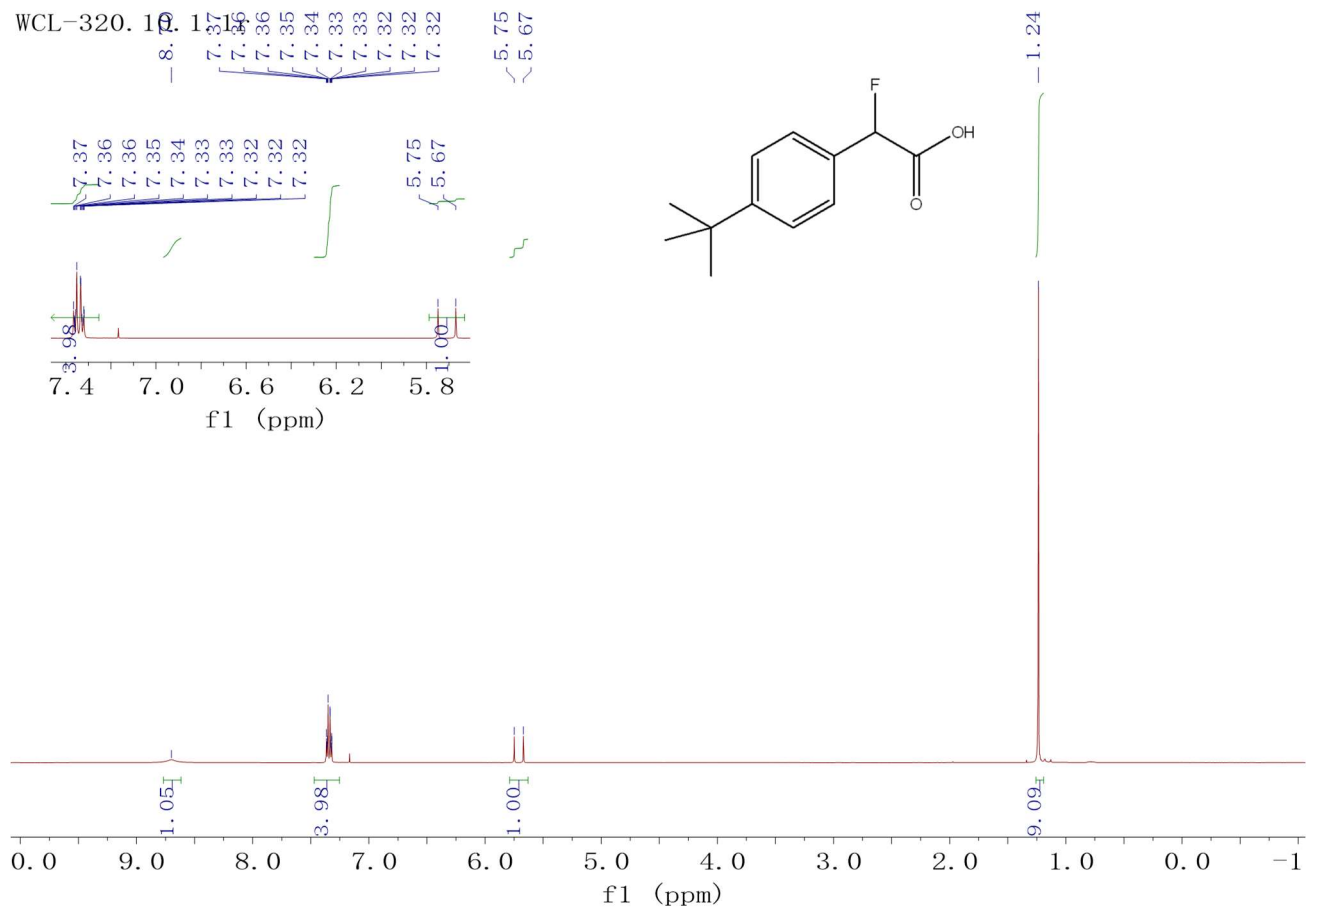

WCL-320. 11. 1.

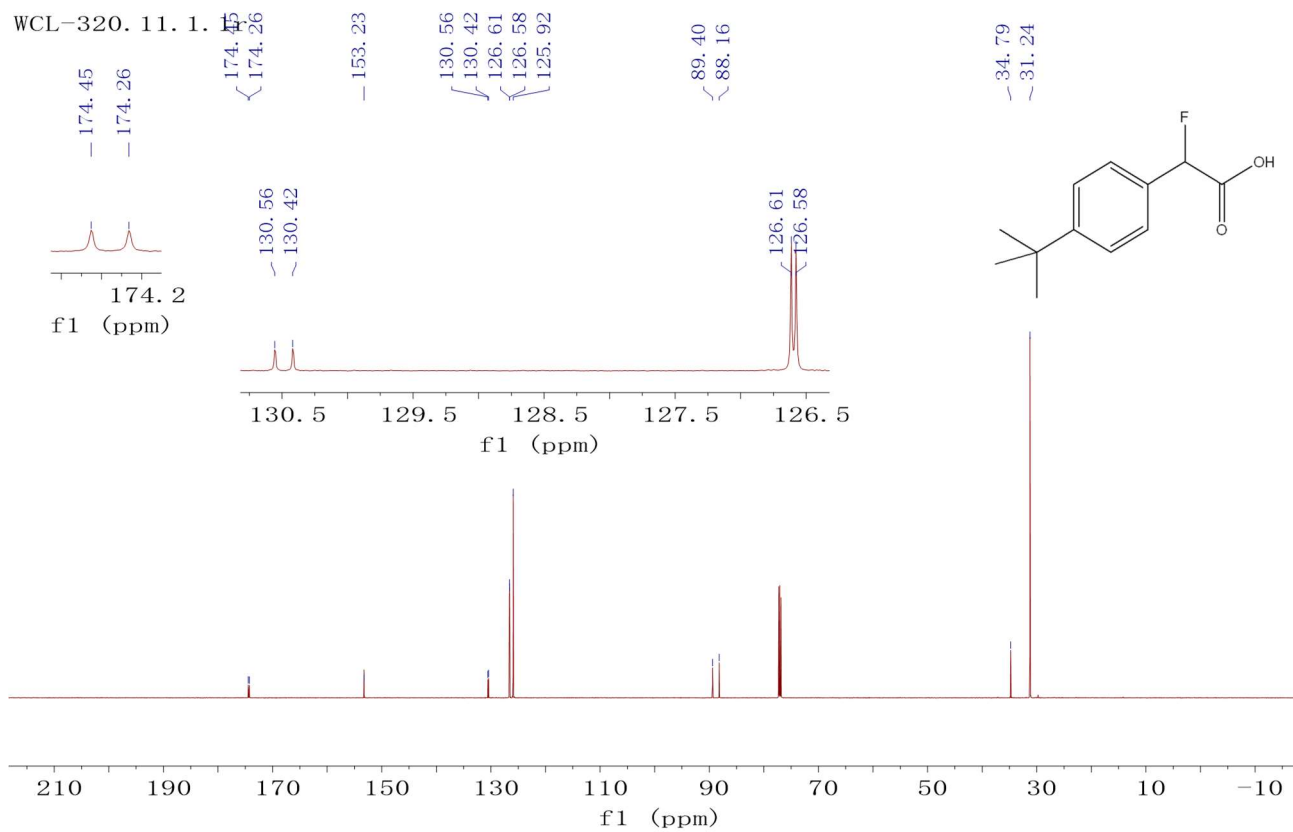

WCL-320. 12. 1. 1r

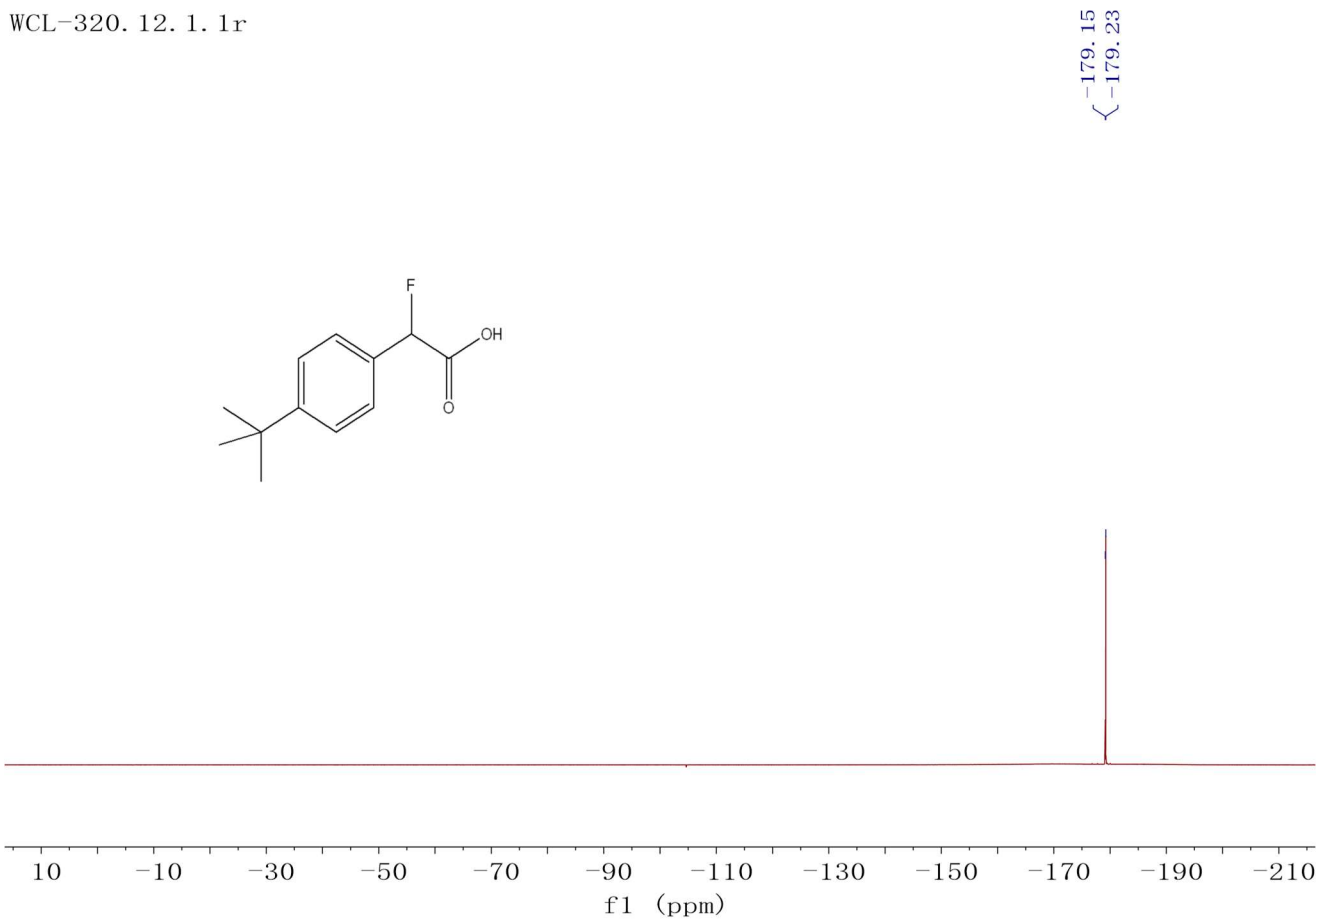

# Compound 11b

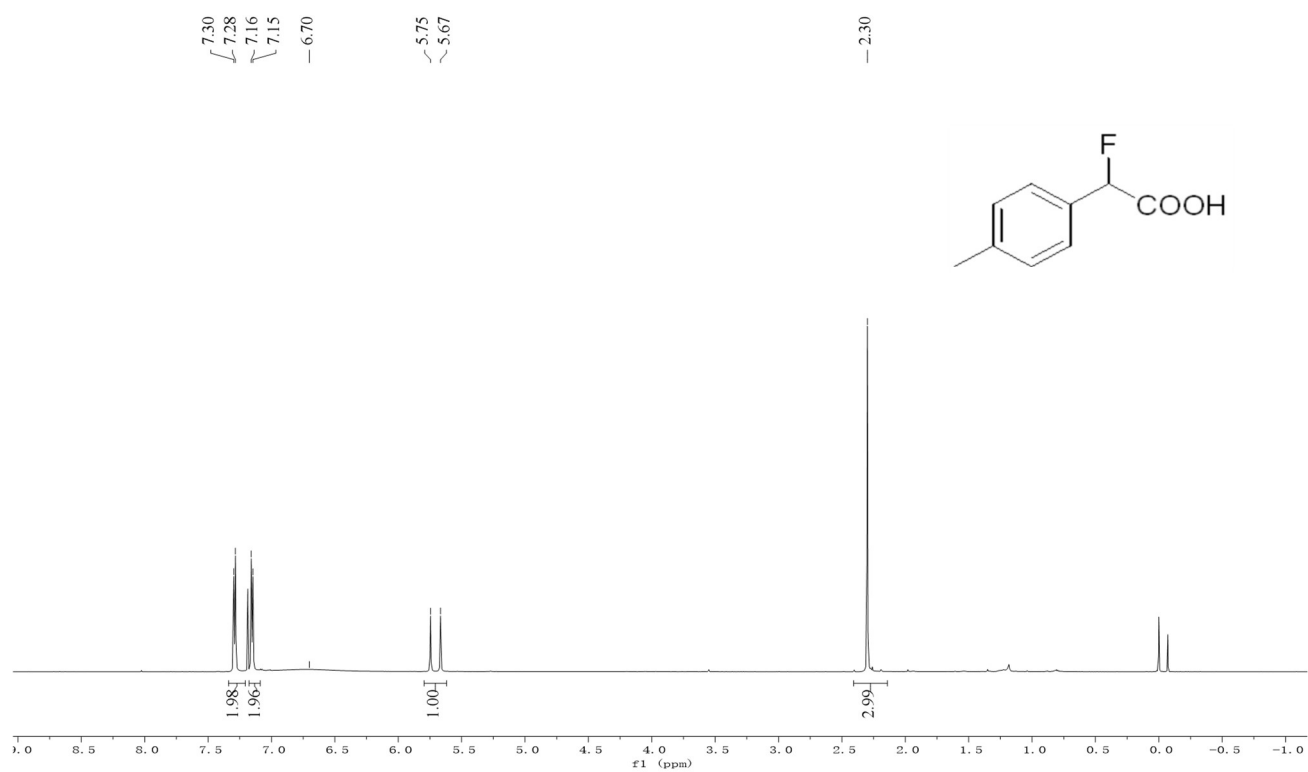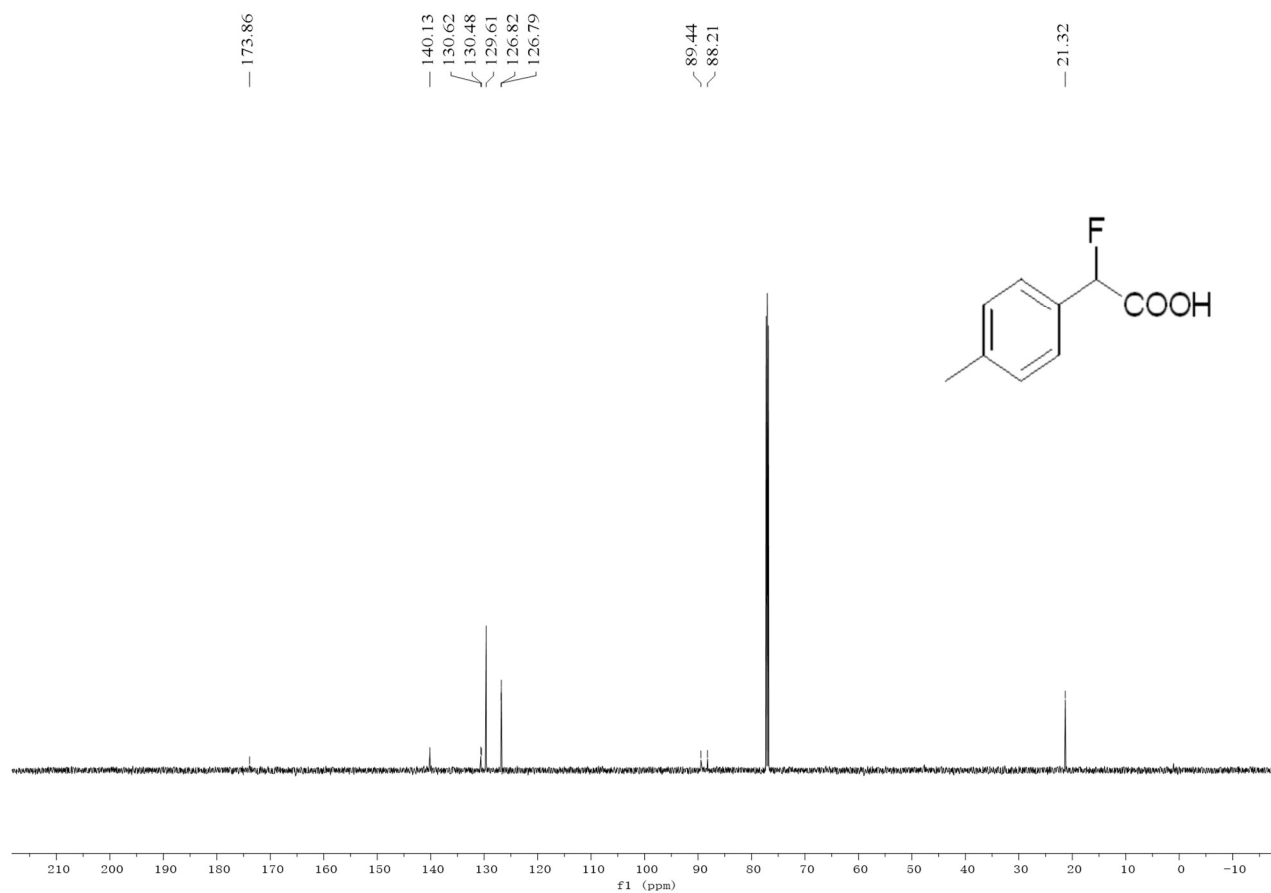



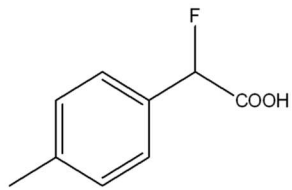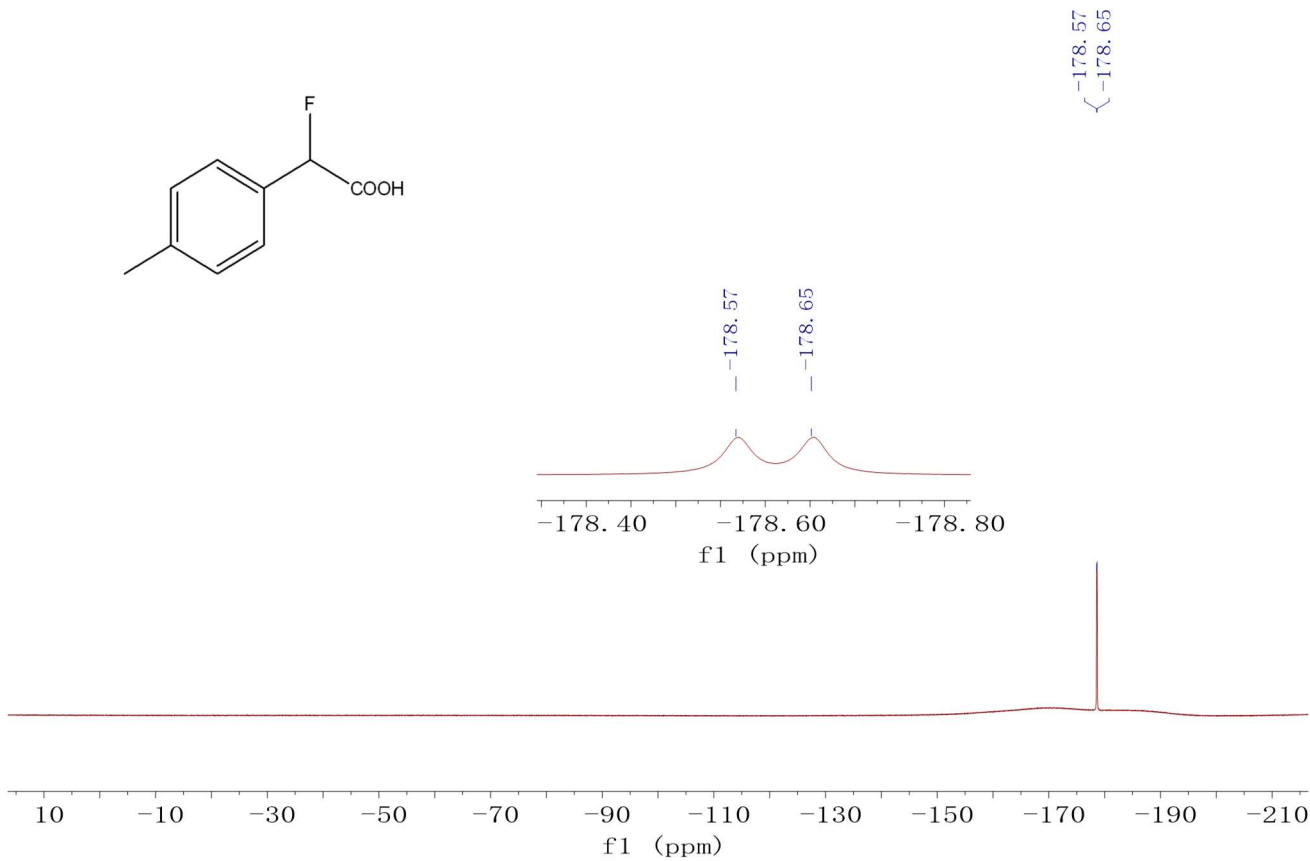

### Compound 12b

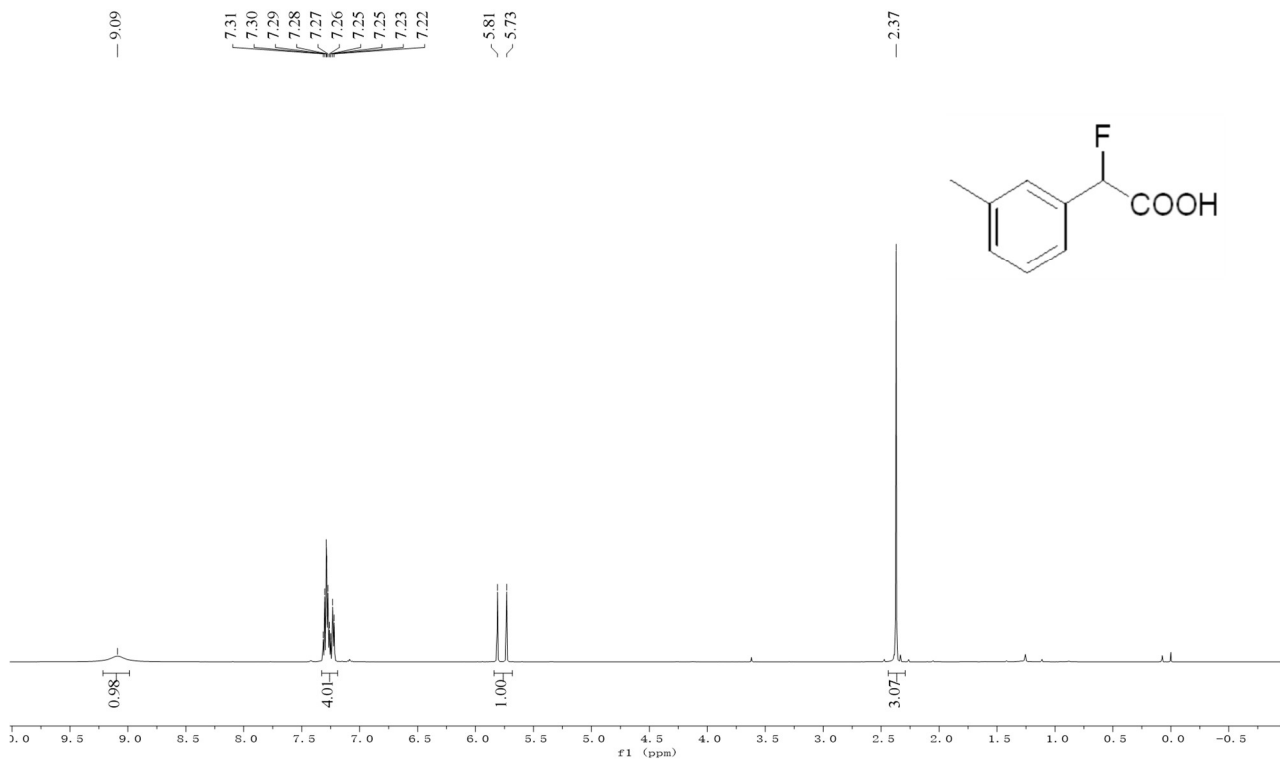

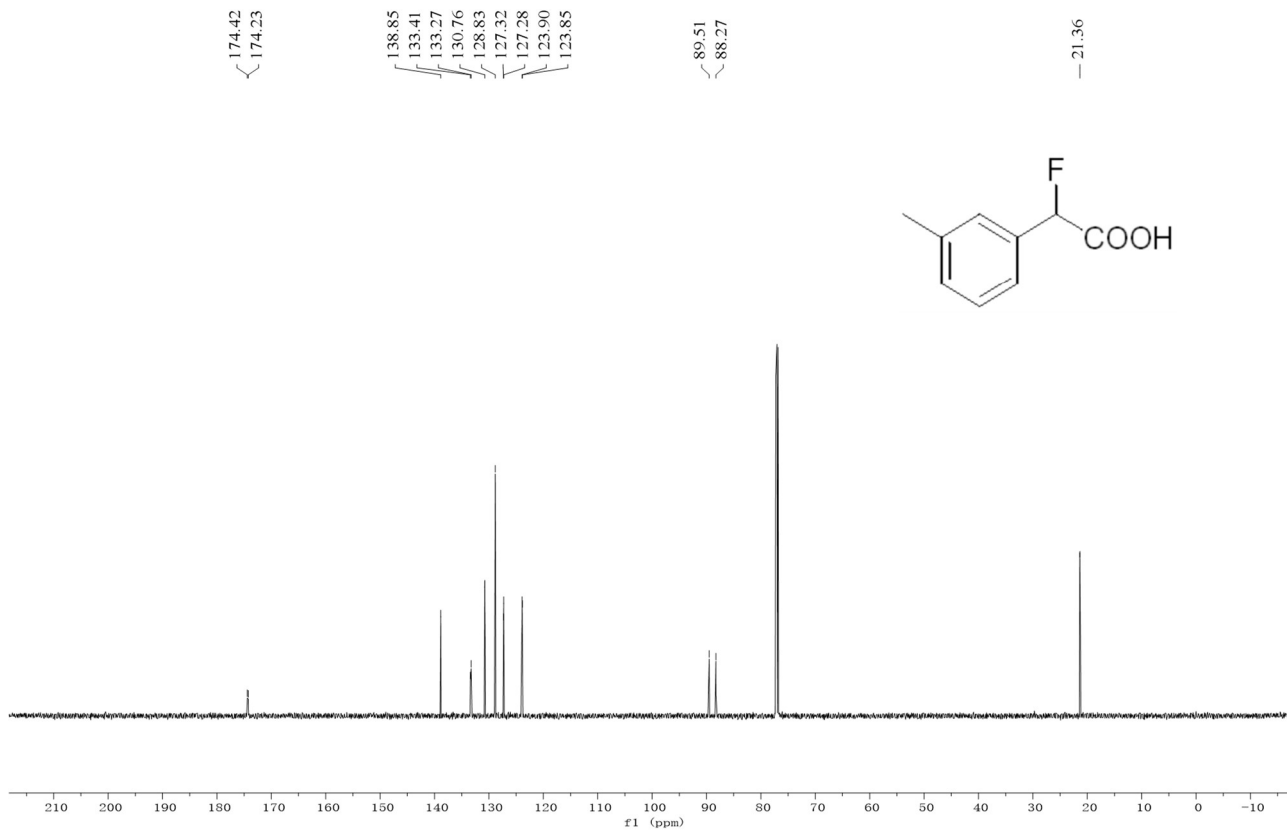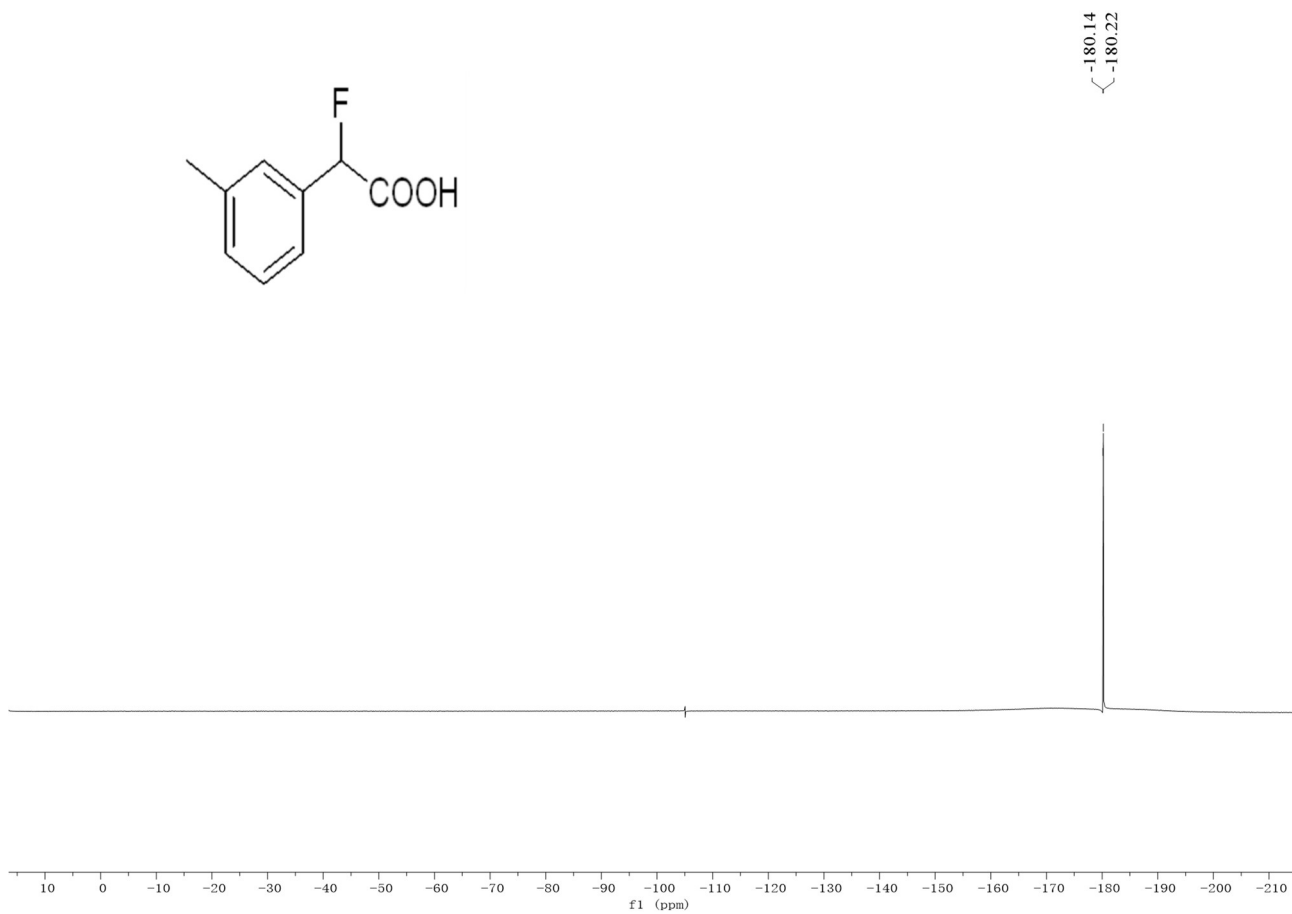

# Compound 13b

7.43  
7.42  
7.33  
7.31  
7.30  
7.26  
7.26  
7.25  
7.24  
7.23  
7.22

6.06  
5.98  
5.67

2.45

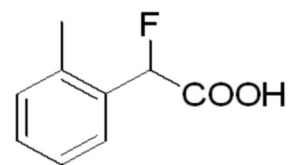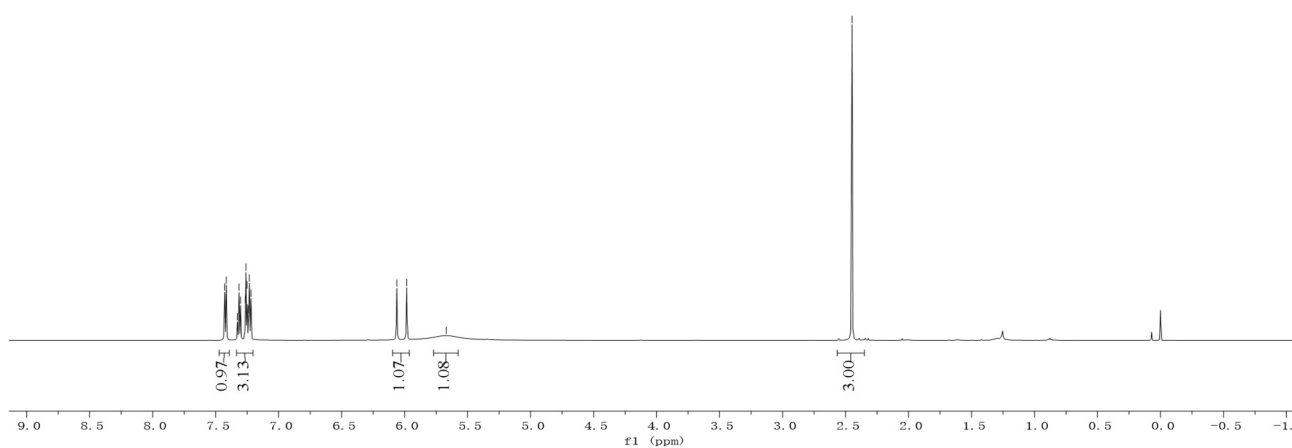

136.67  
136.64

173.87

136.67  
136.64  
132.12  
131.99  
131.03  
129.96  
127.34  
127.29  
126.46

129.96

87.37  
86.14

19.19

127.34  
127.29

126.46

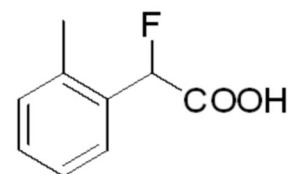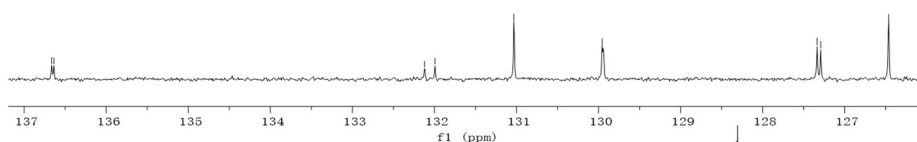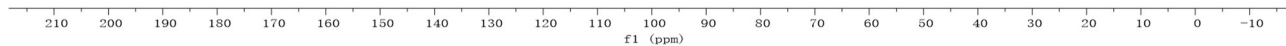

-180.04  
-180.12

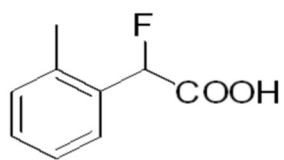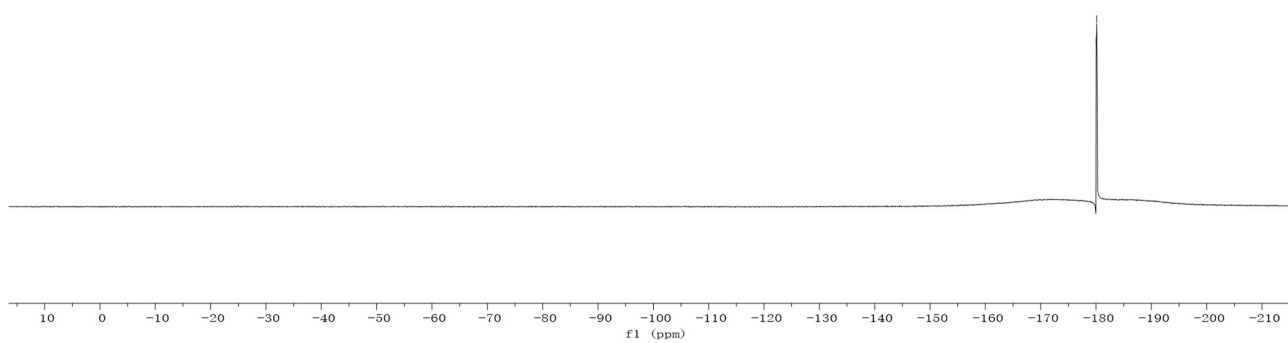

### Compound 14b

7.53  
7.53  
7.52  
7.52  
7.45  
7.45  
7.44  
7.39  
7.38  
7.38  
7.37  
7.37  
7.37  
7.36  
7.36  
7.36  
7.35  
7.35  
7.34  
7.34  
7.33  
7.32  
7.11  
6.23

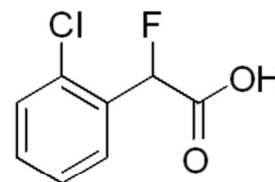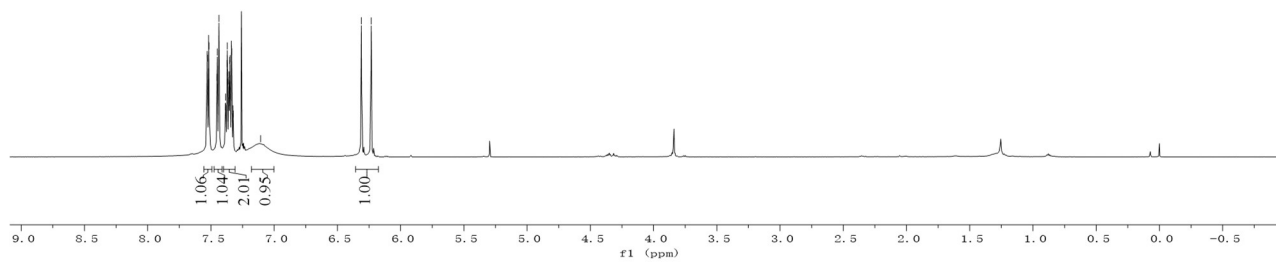

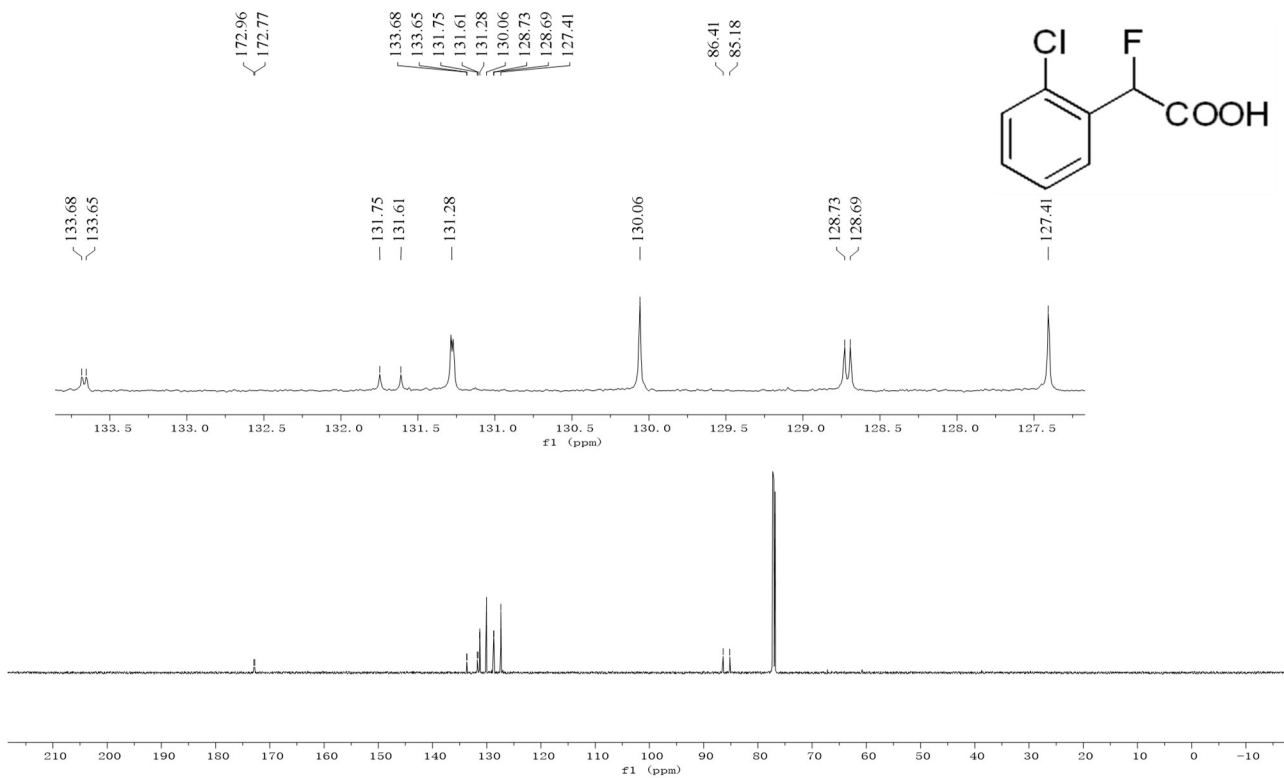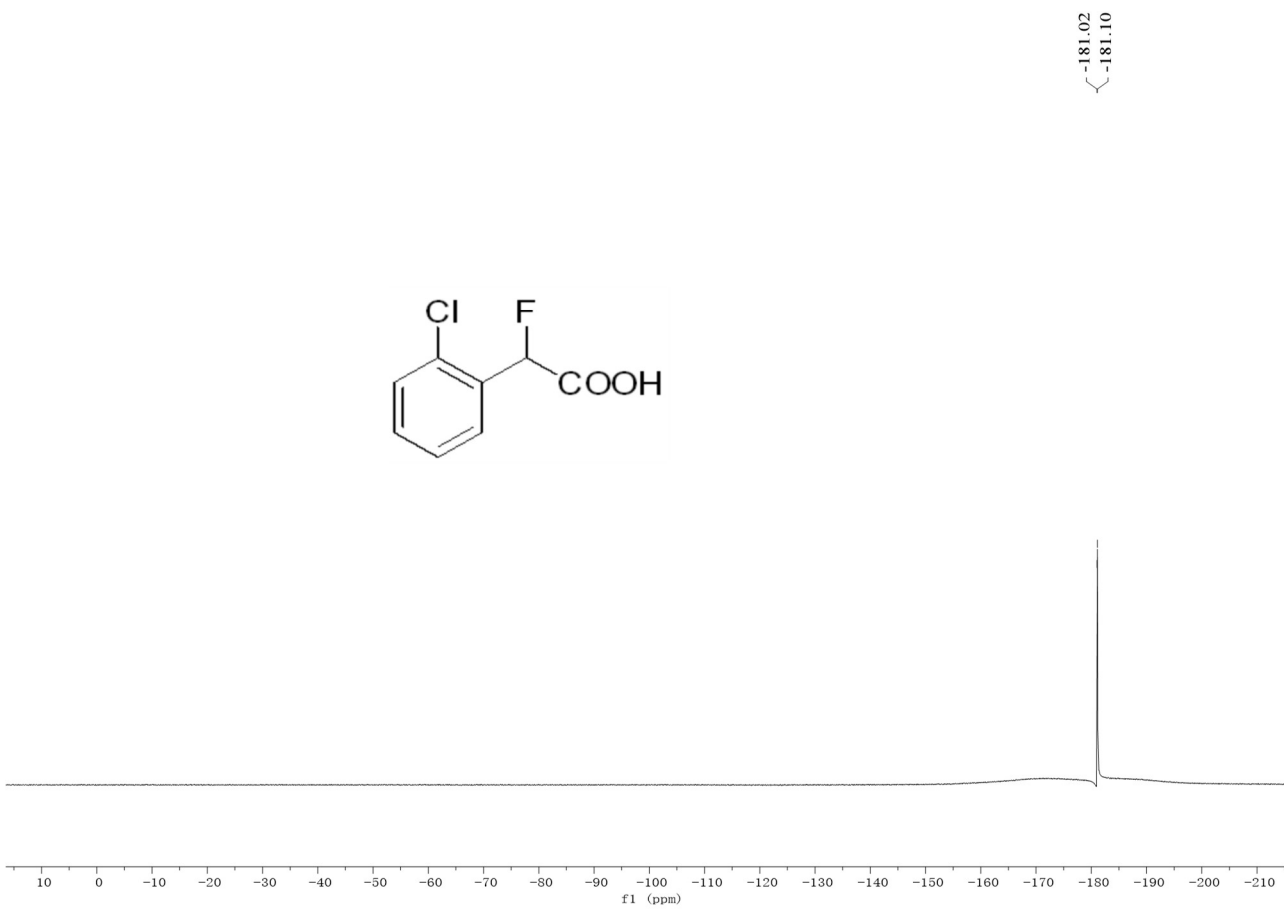

# Compound 15b

8.15  
8.14  
7.92  
7.91  
7.89  
7.88  
7.62  
7.61  
7.57  
7.57  
7.56  
7.56  
7.55  
7.55  
7.54  
7.54  
7.53  
7.52  
7.51  
7.49  
7.47  
7.46  
6.42  
6.35

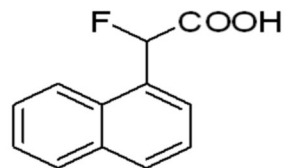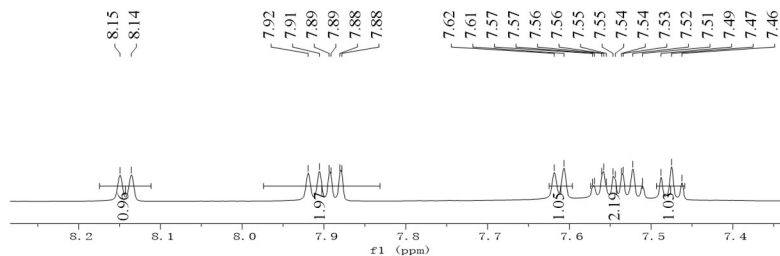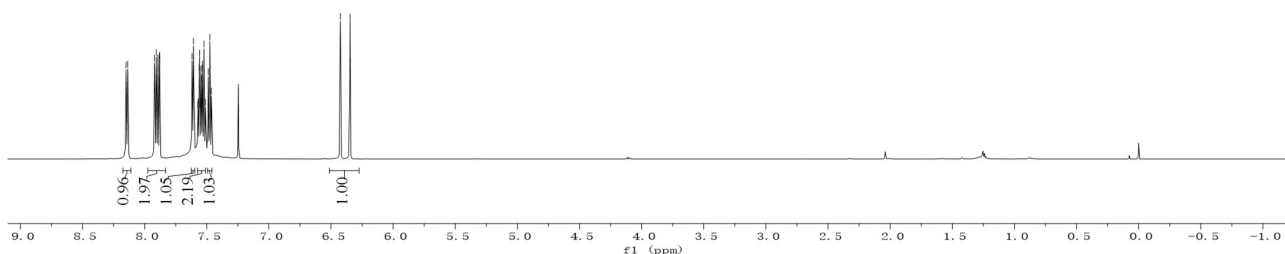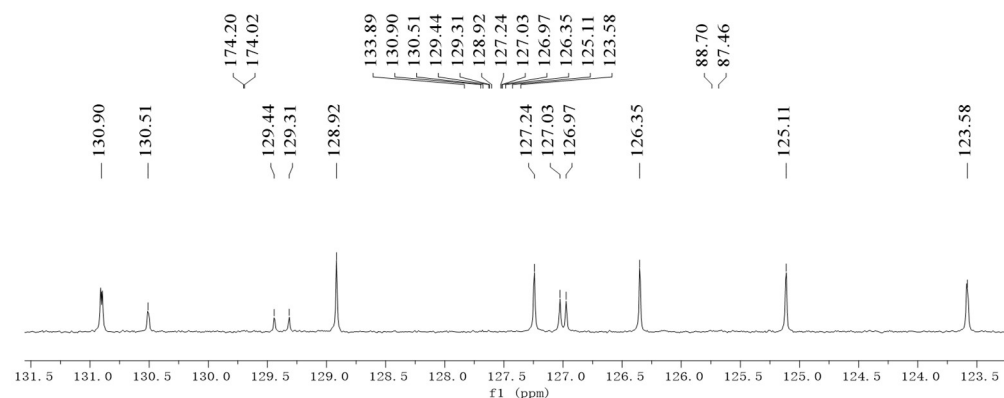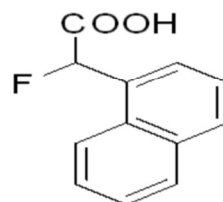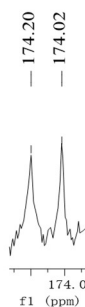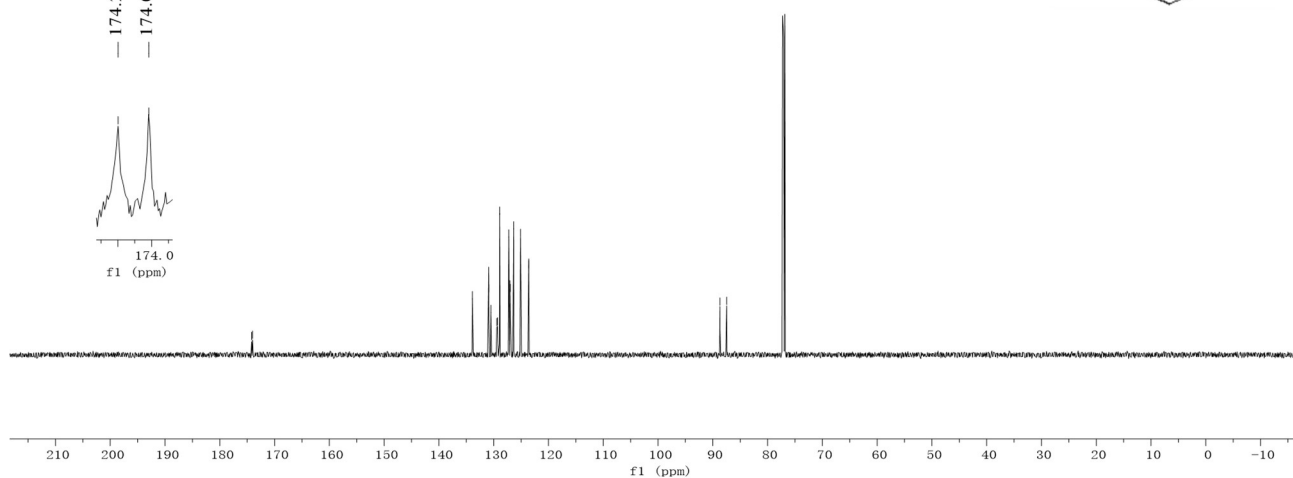

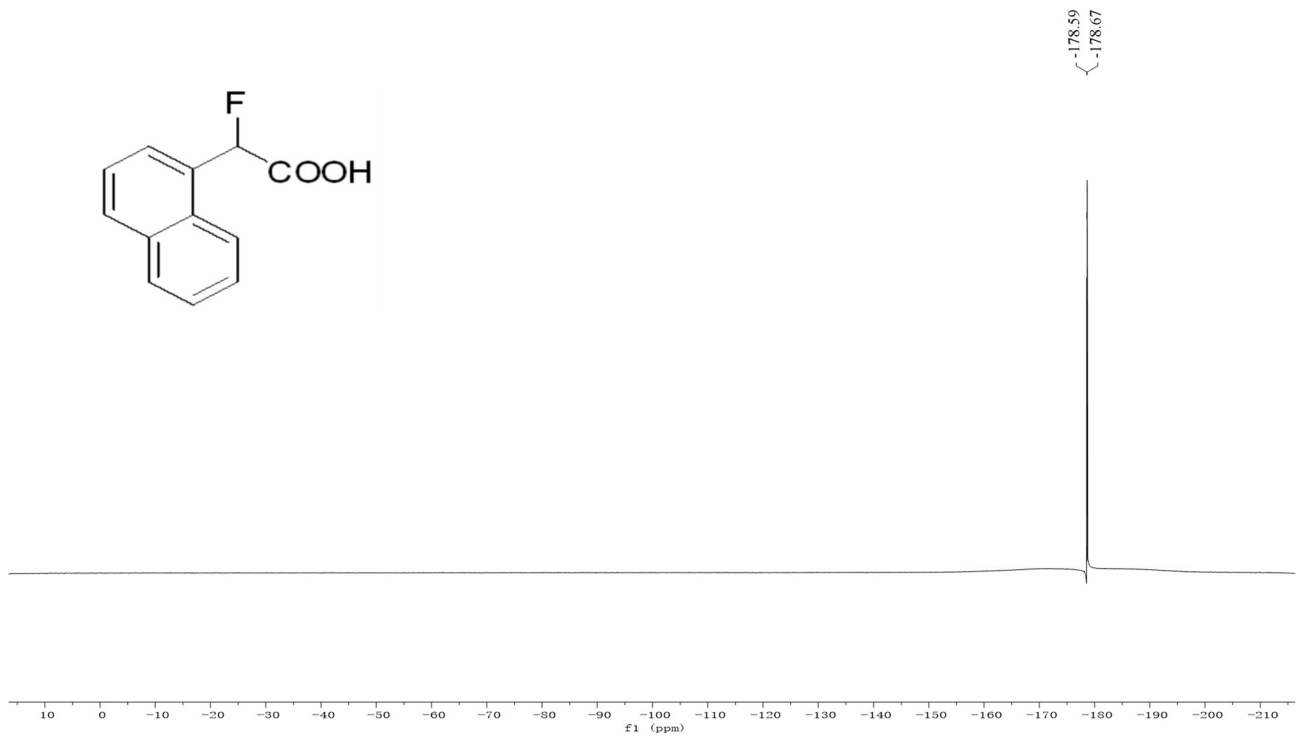

### Compound 16b

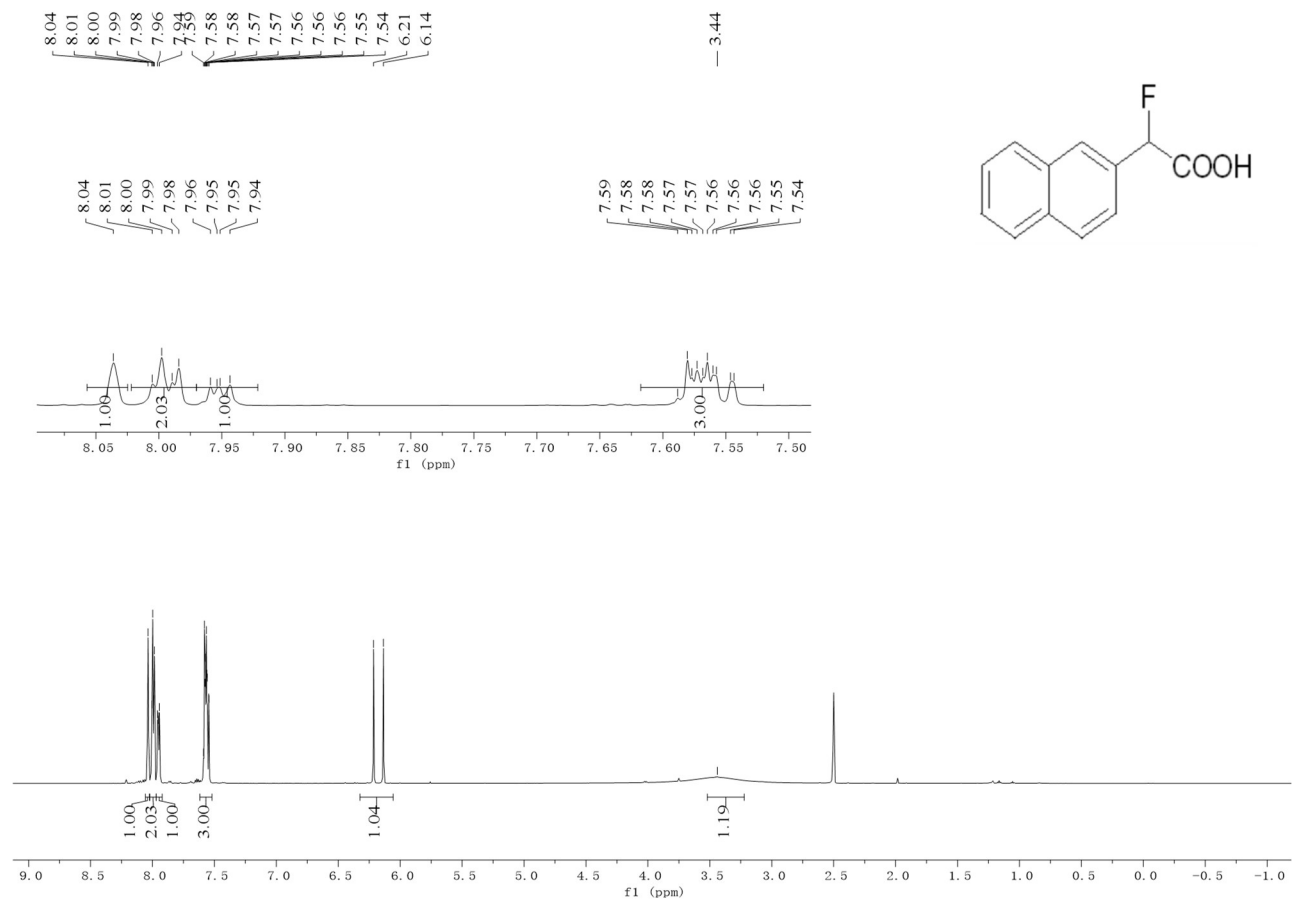

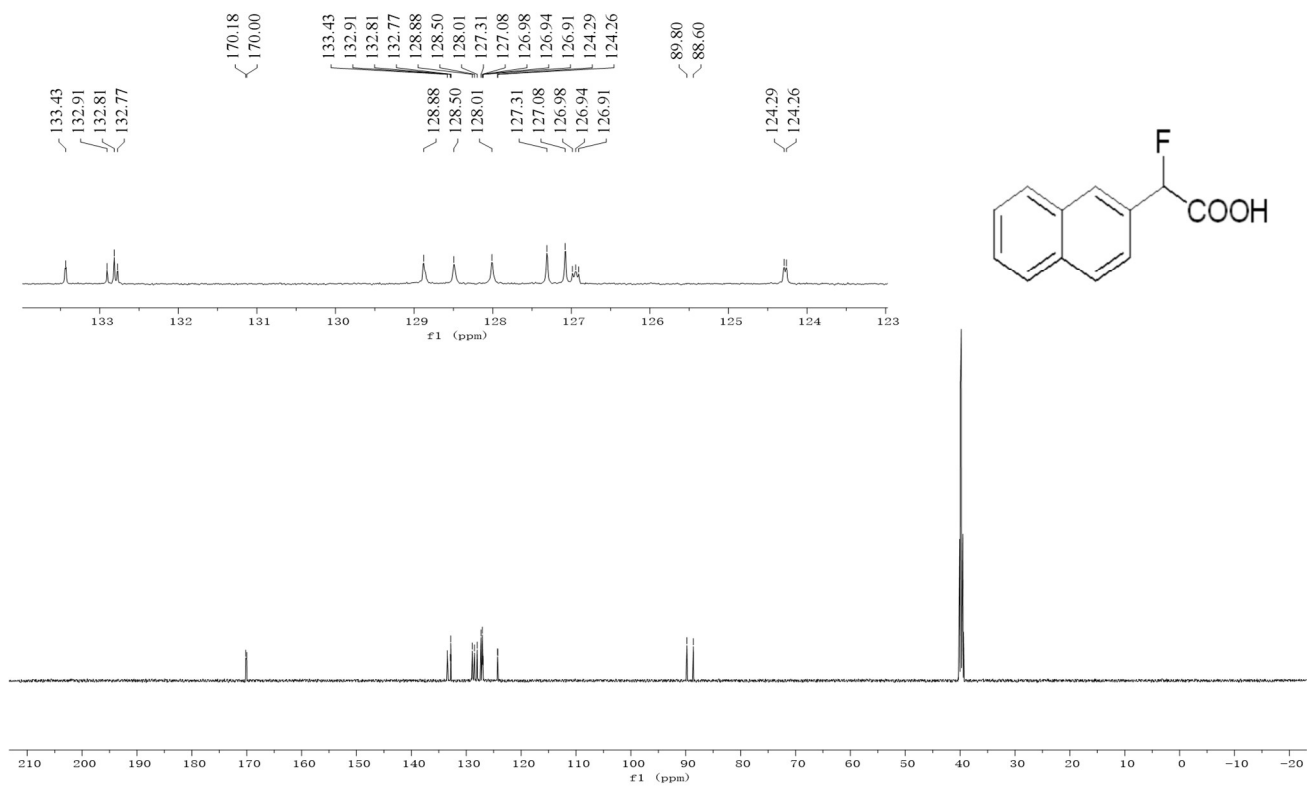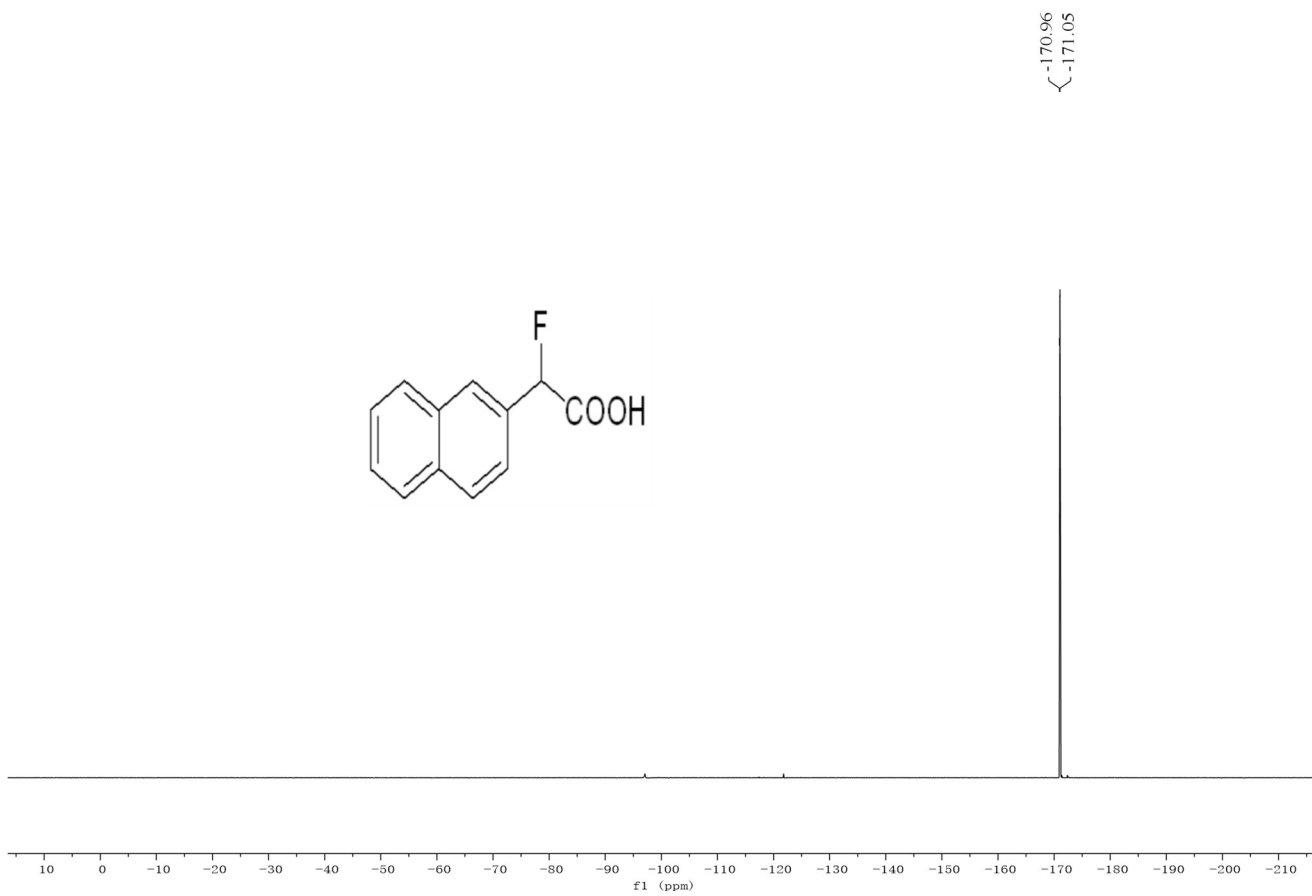



# Compound 17b

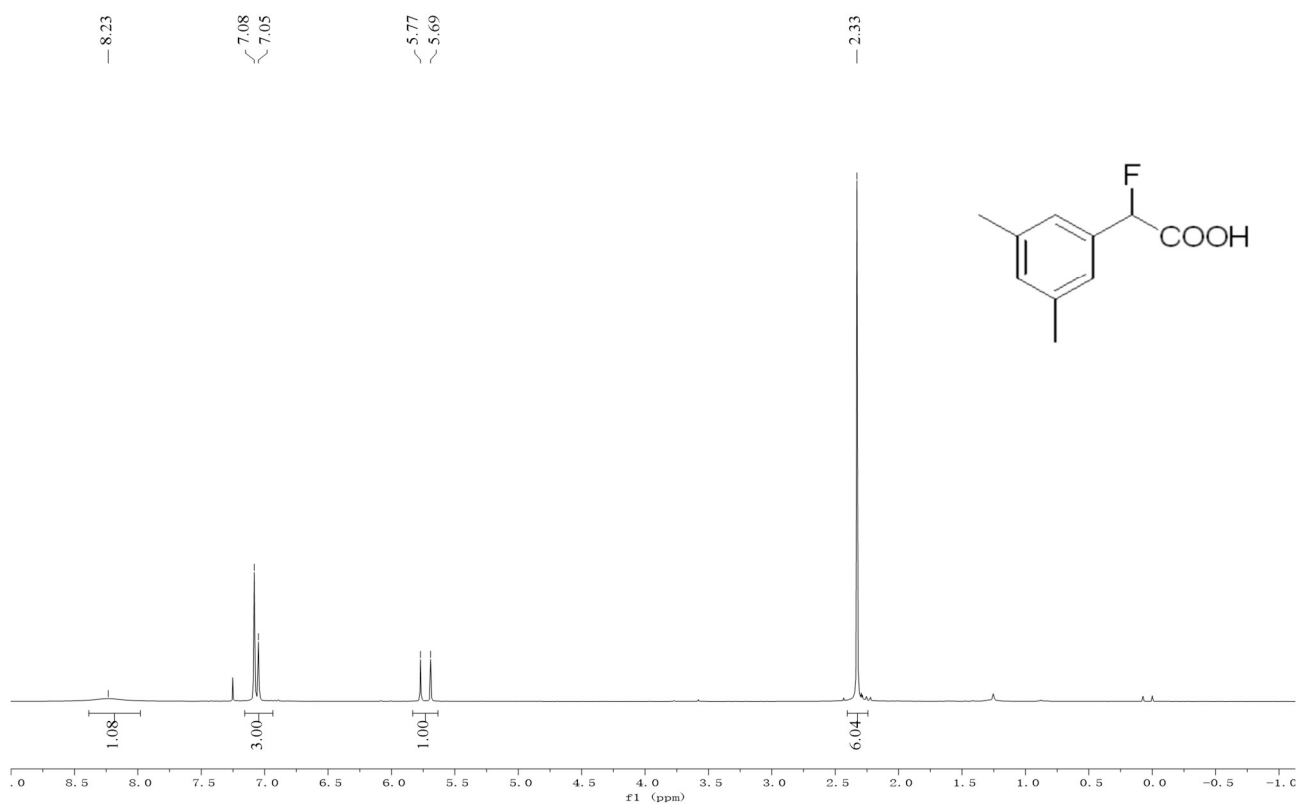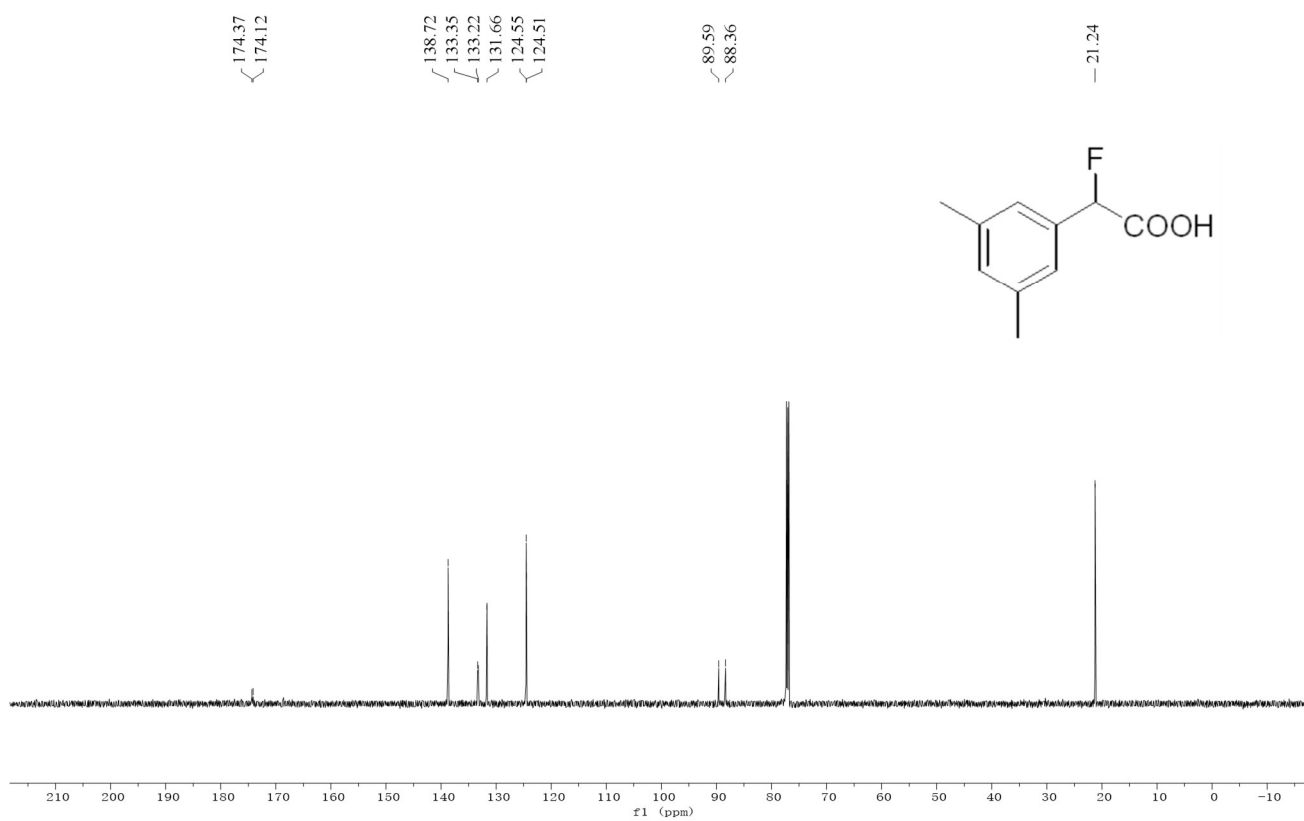

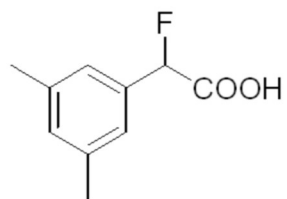

-179.38  
-179.46

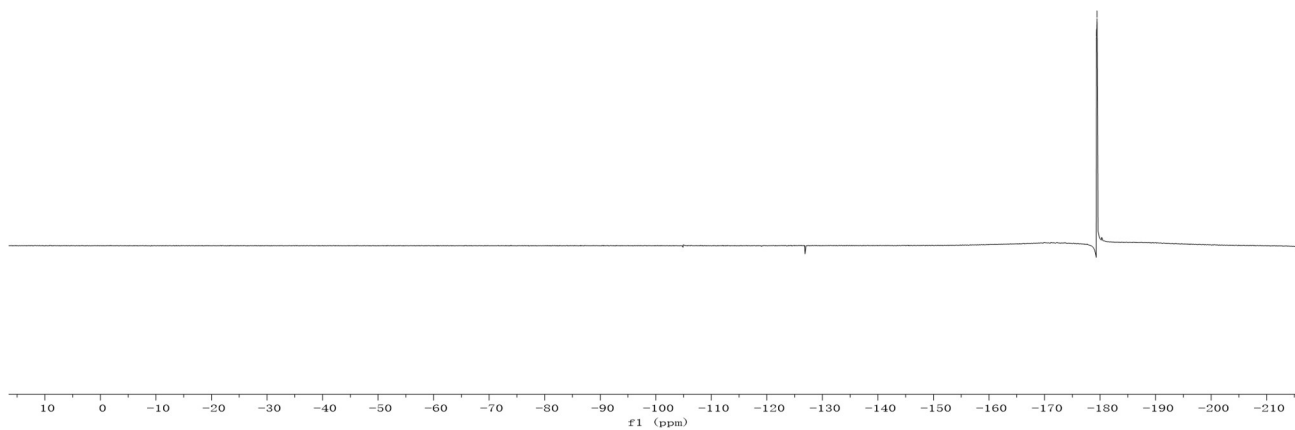

**Compound 18b**

WCL-3222 10. 1. 1r

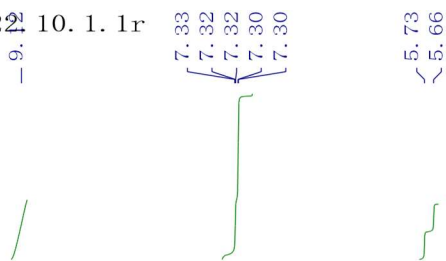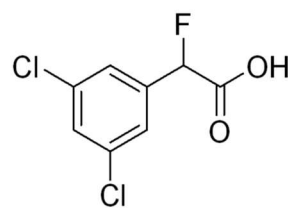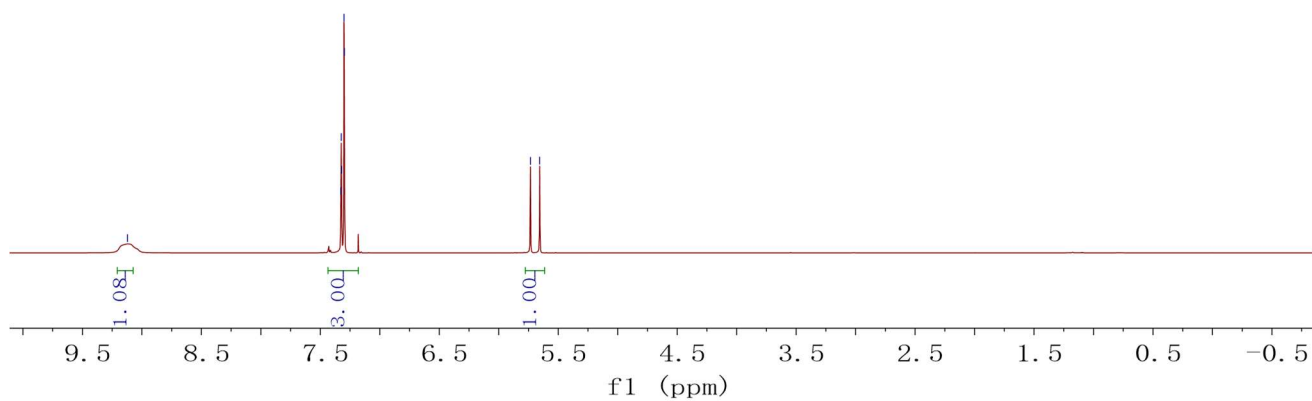

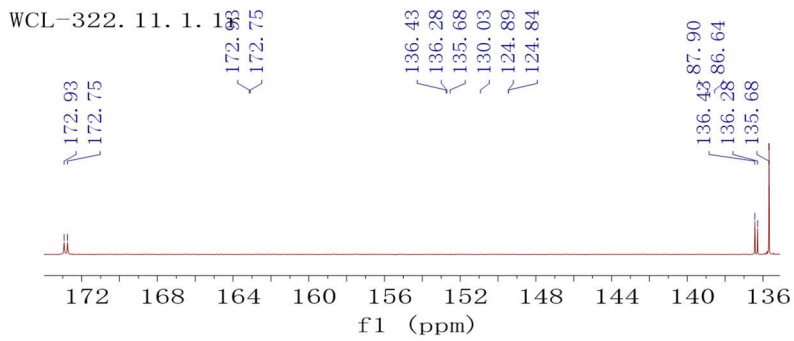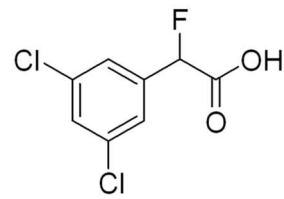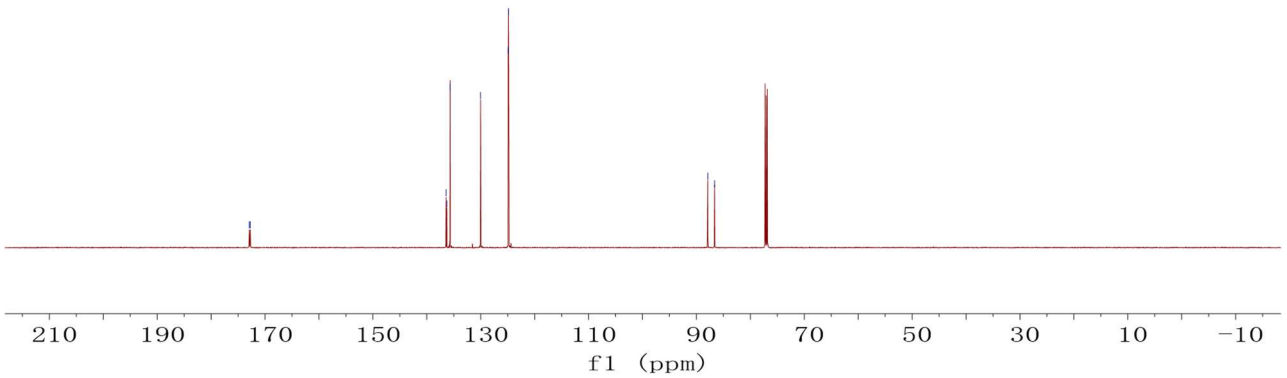

WCL-322. 12. 1. 1r

-184.82  
-184.90

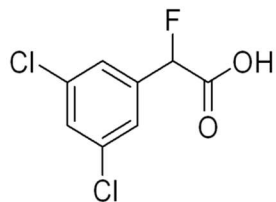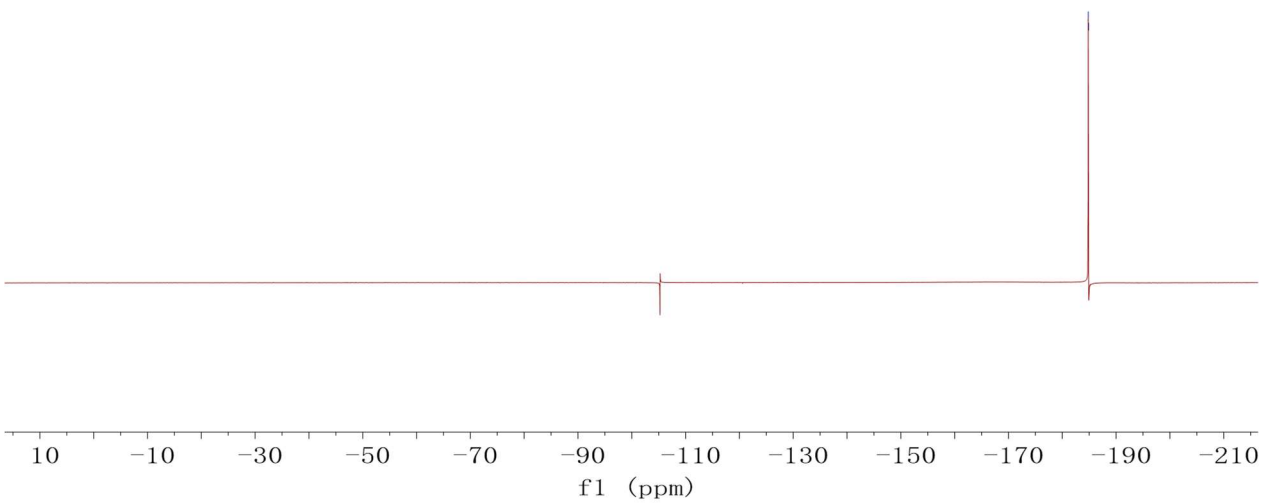

# Compound 19b

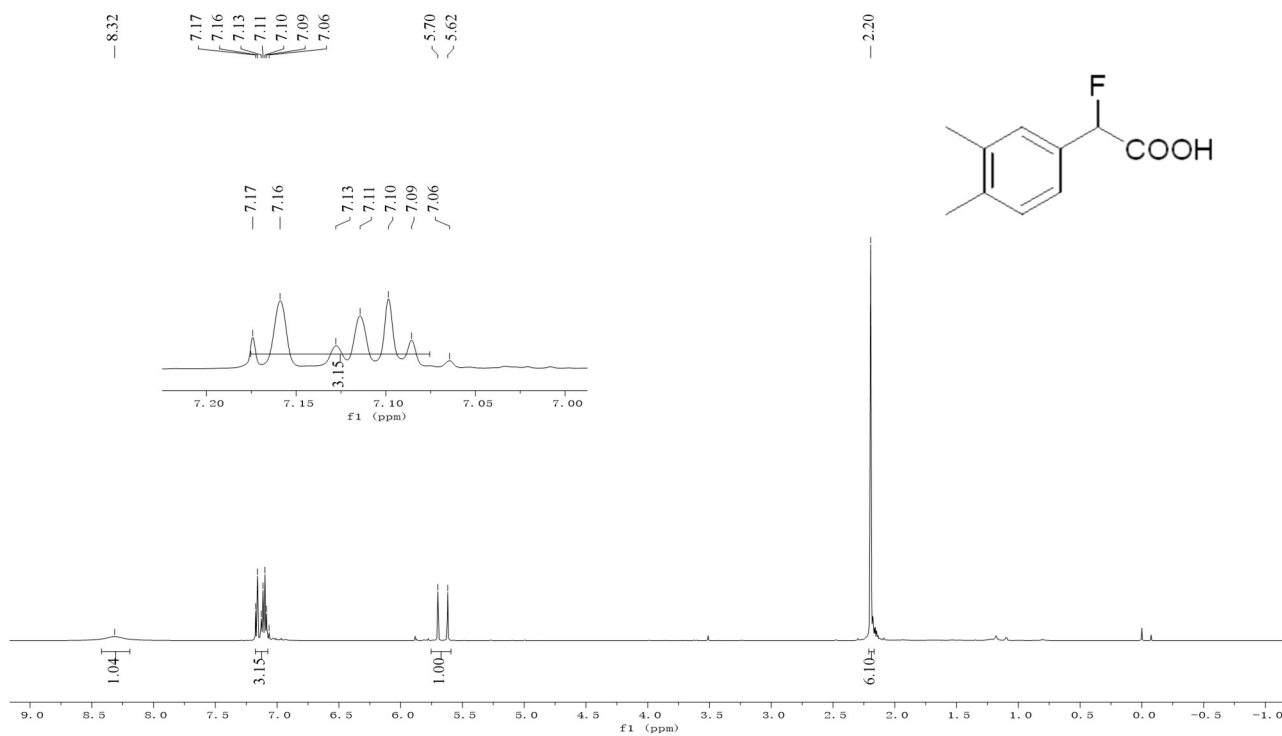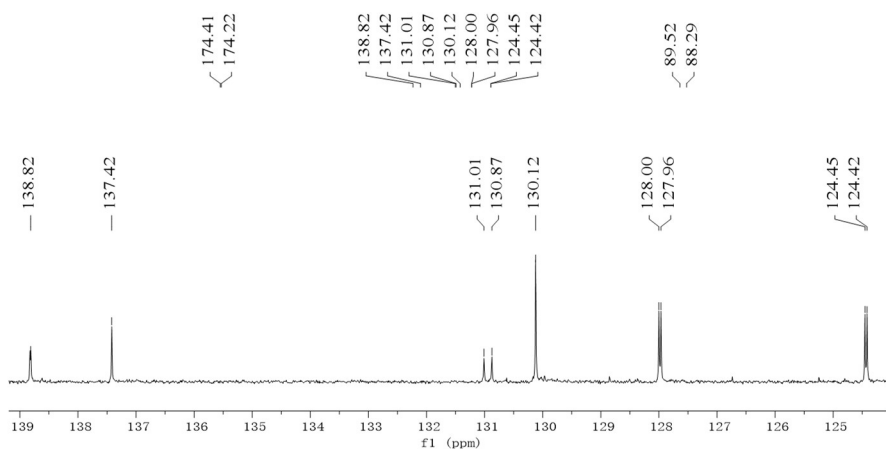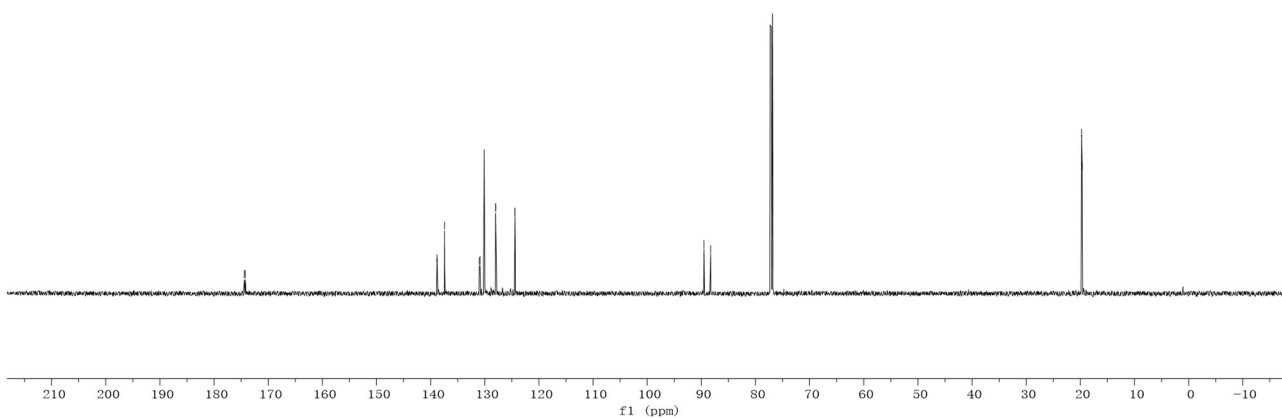

-177.95  
-178.04

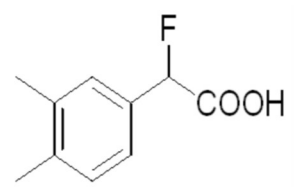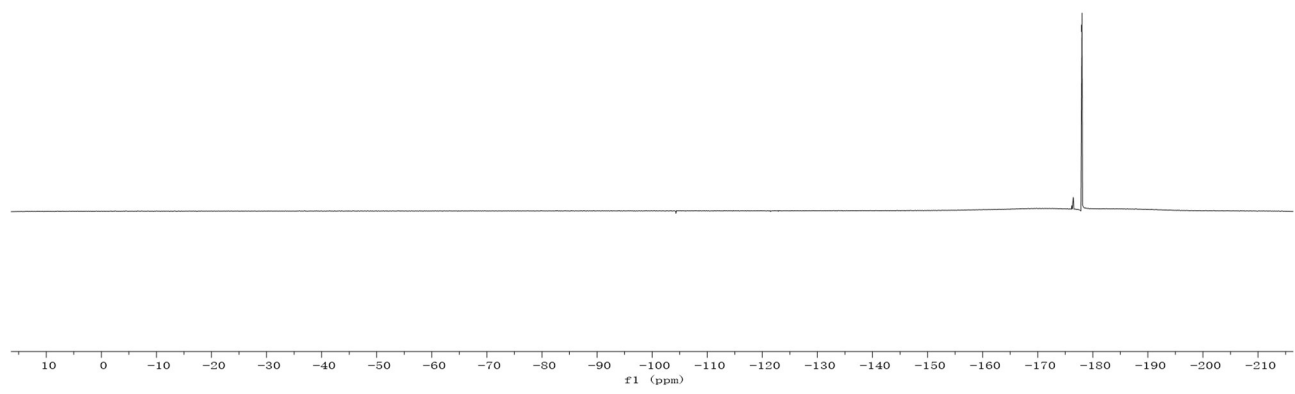

### Compound 20b

7.19  
7.15  
7.15  
7.14  
7.14  
7.13  
6.94  
6.91  
6.91  
5.64  
3.84

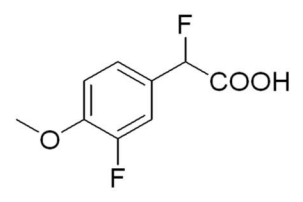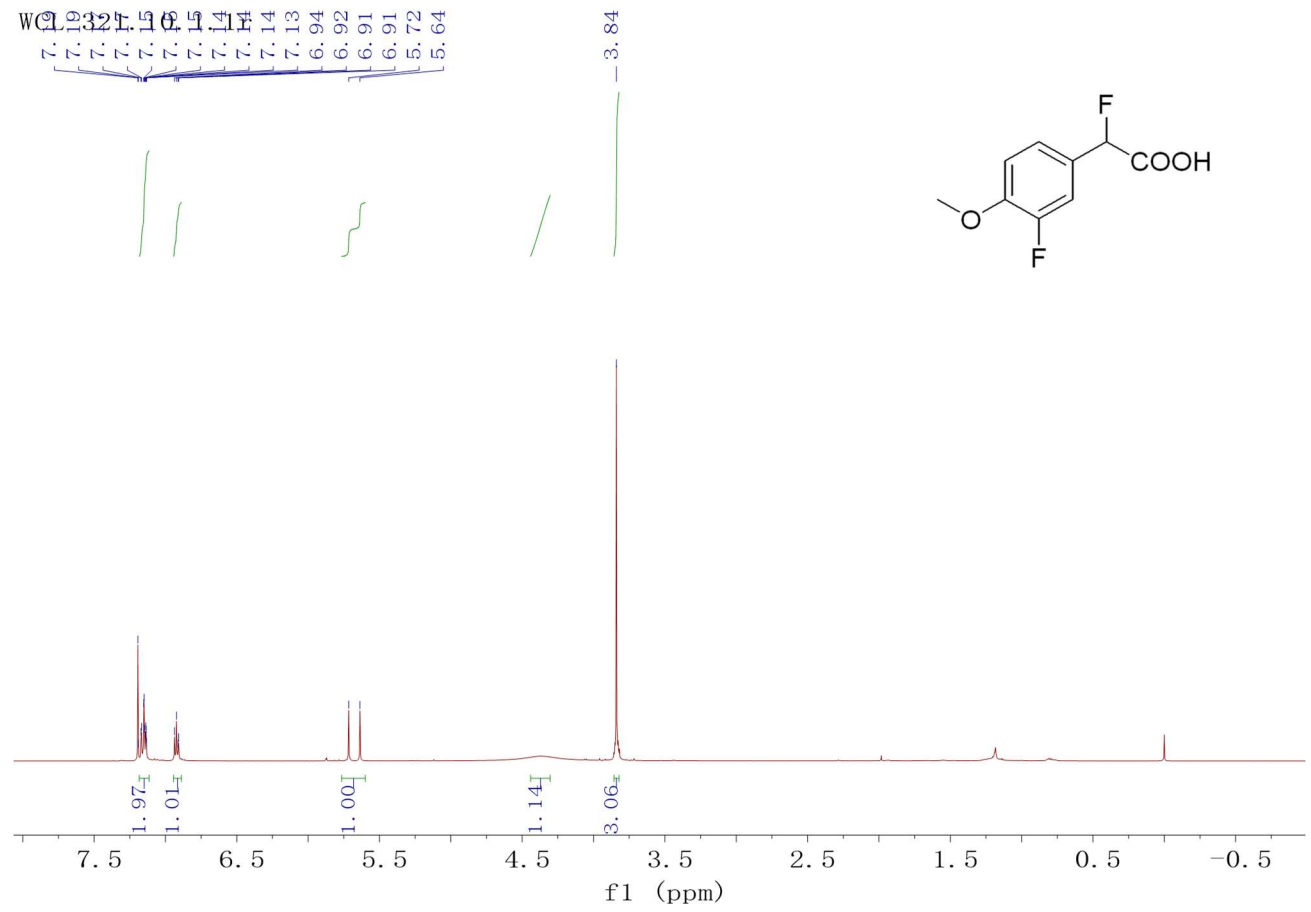

WCL-321. 11. 1. 157

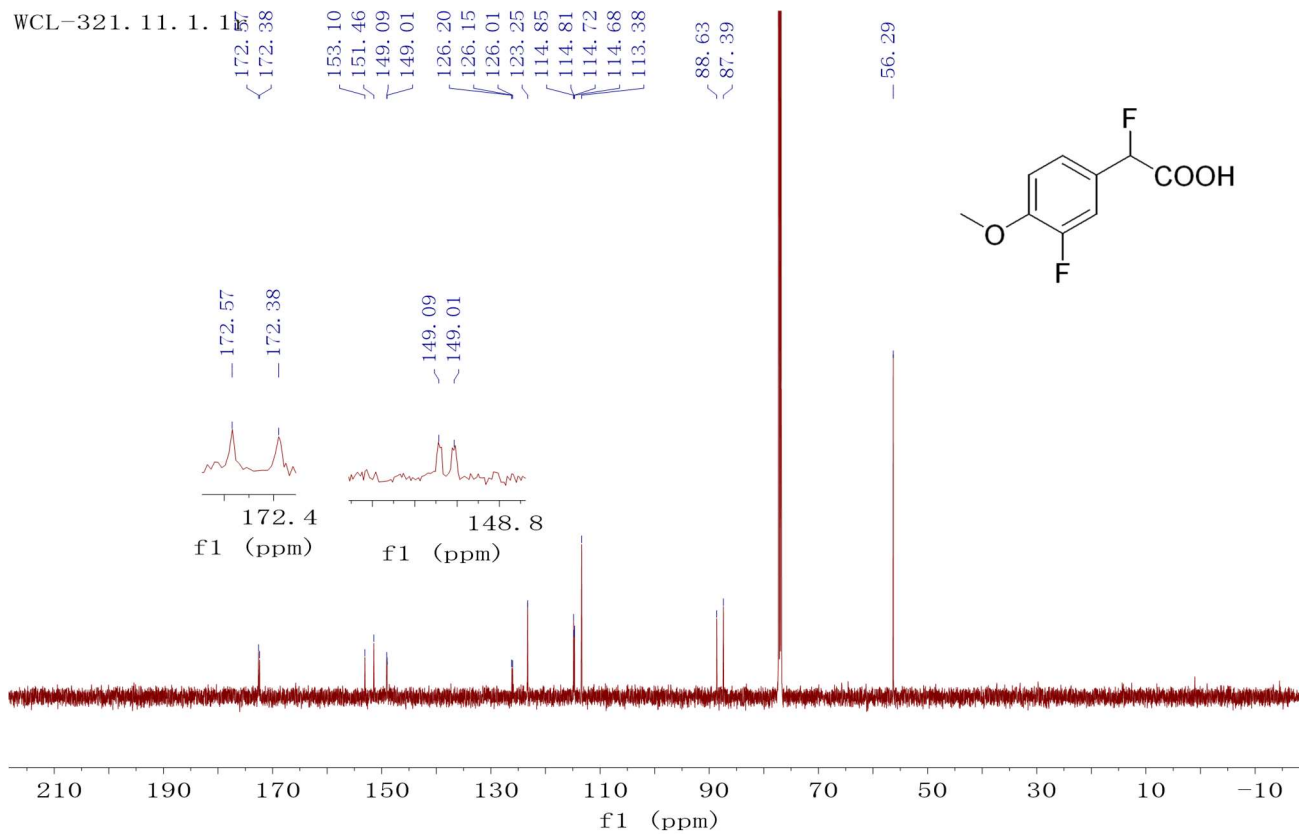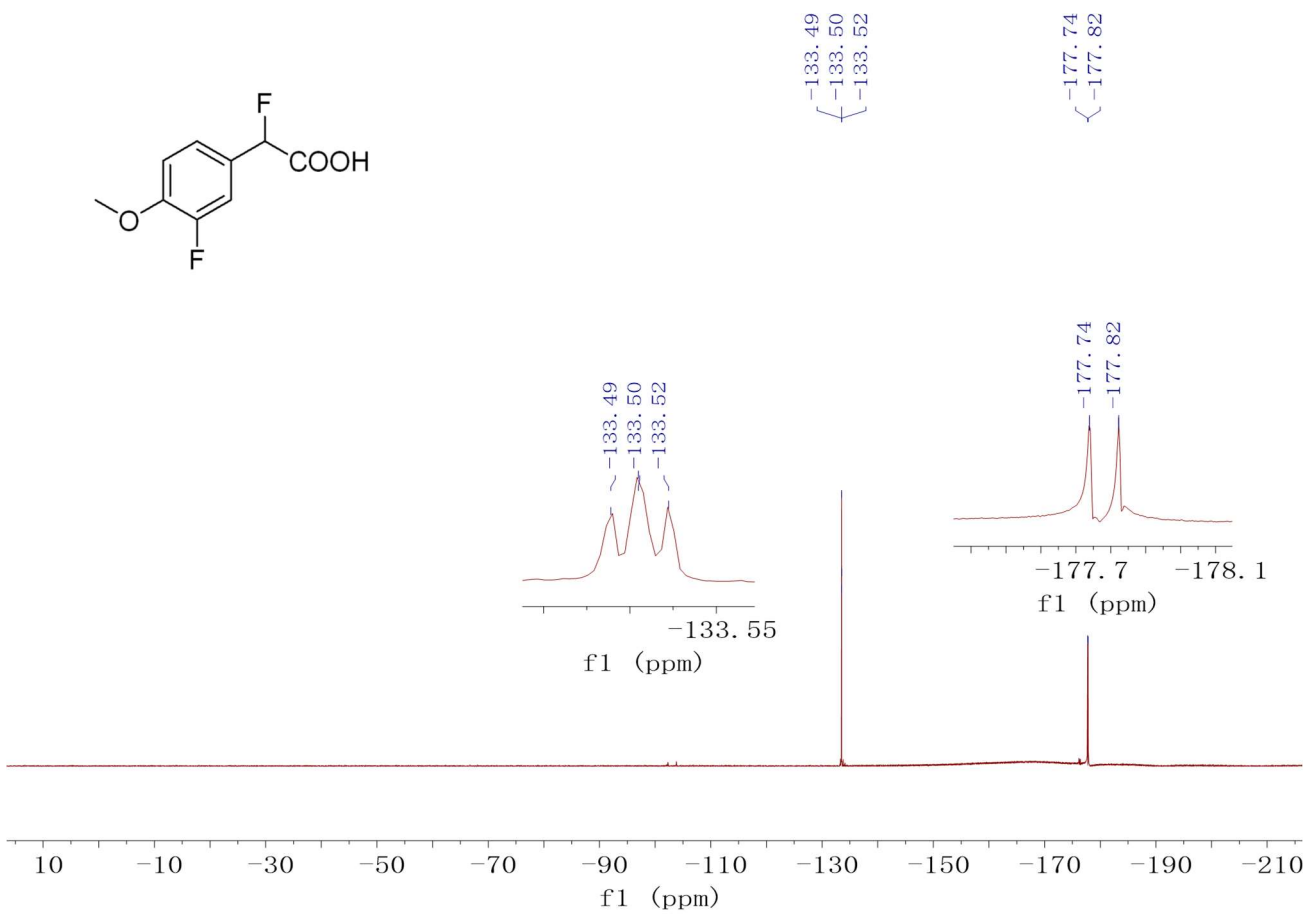

# Compound 21b

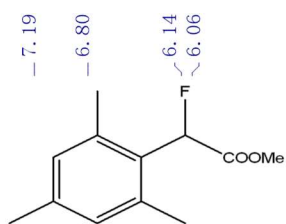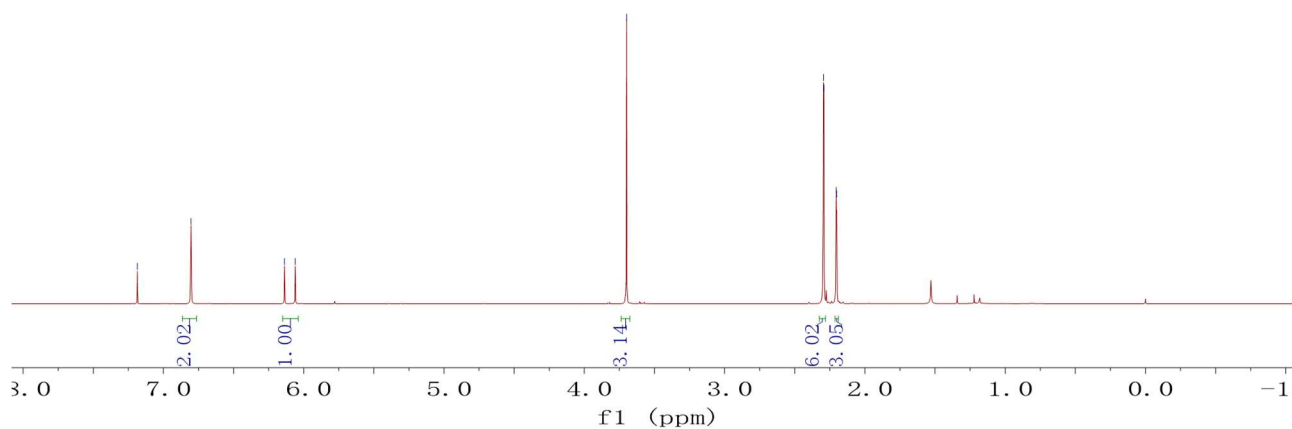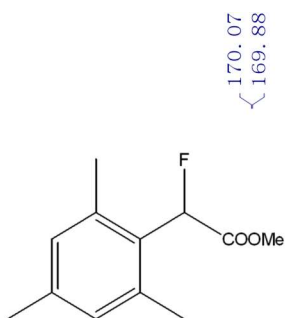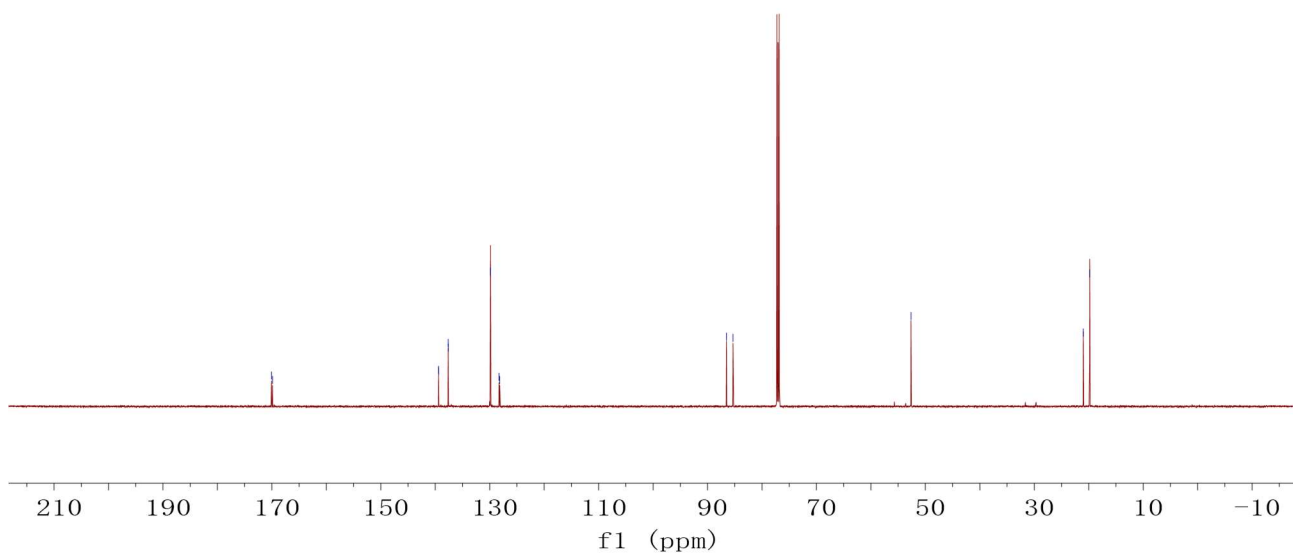

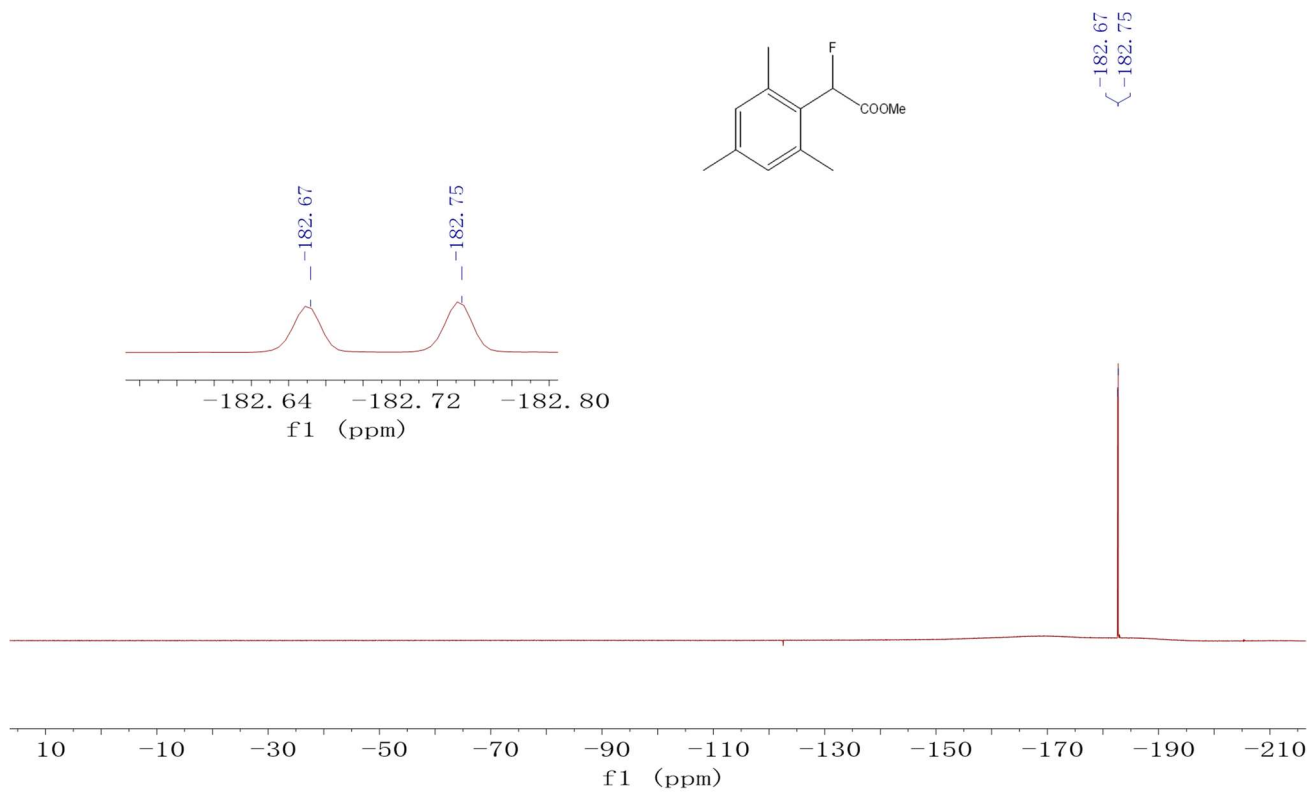

**Compound 22b**

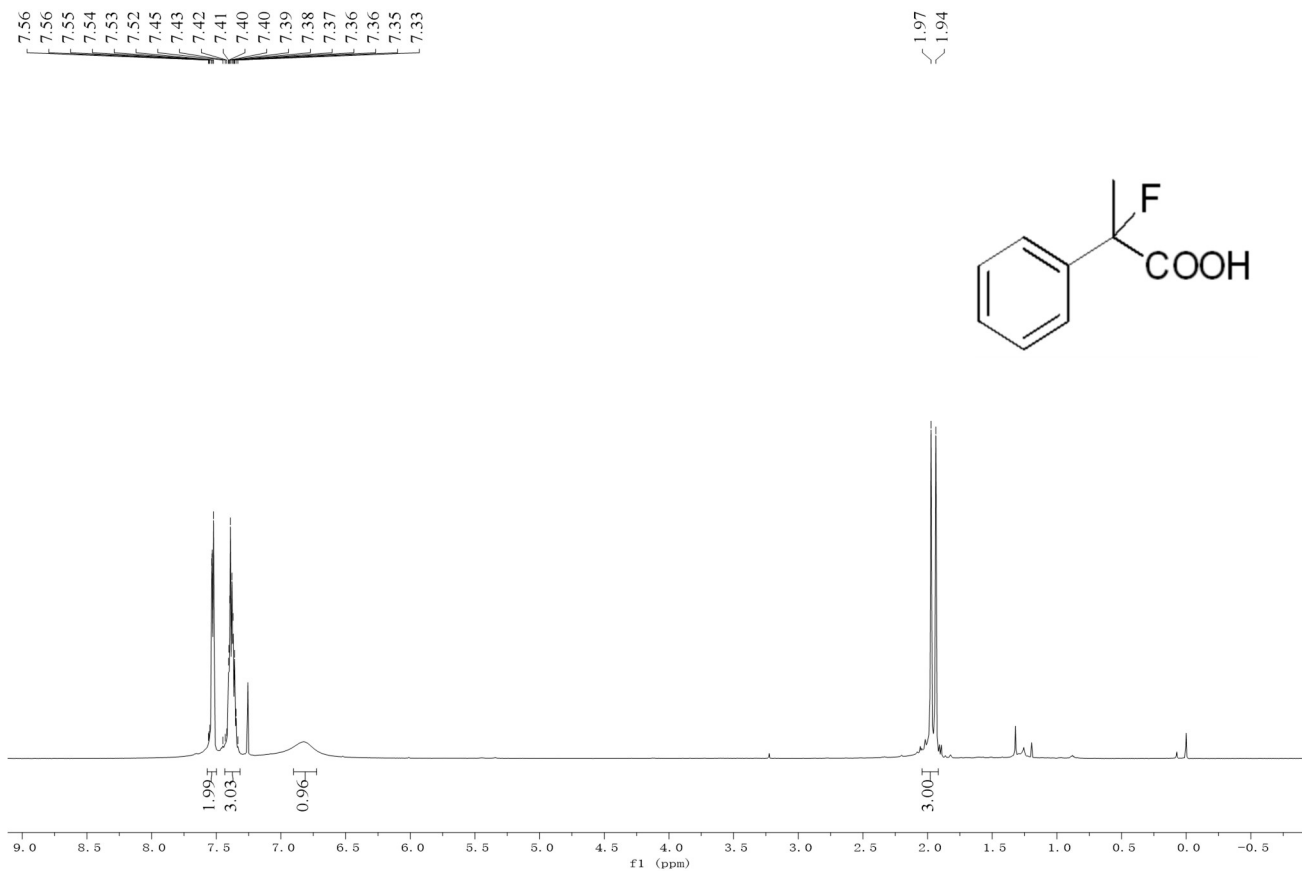



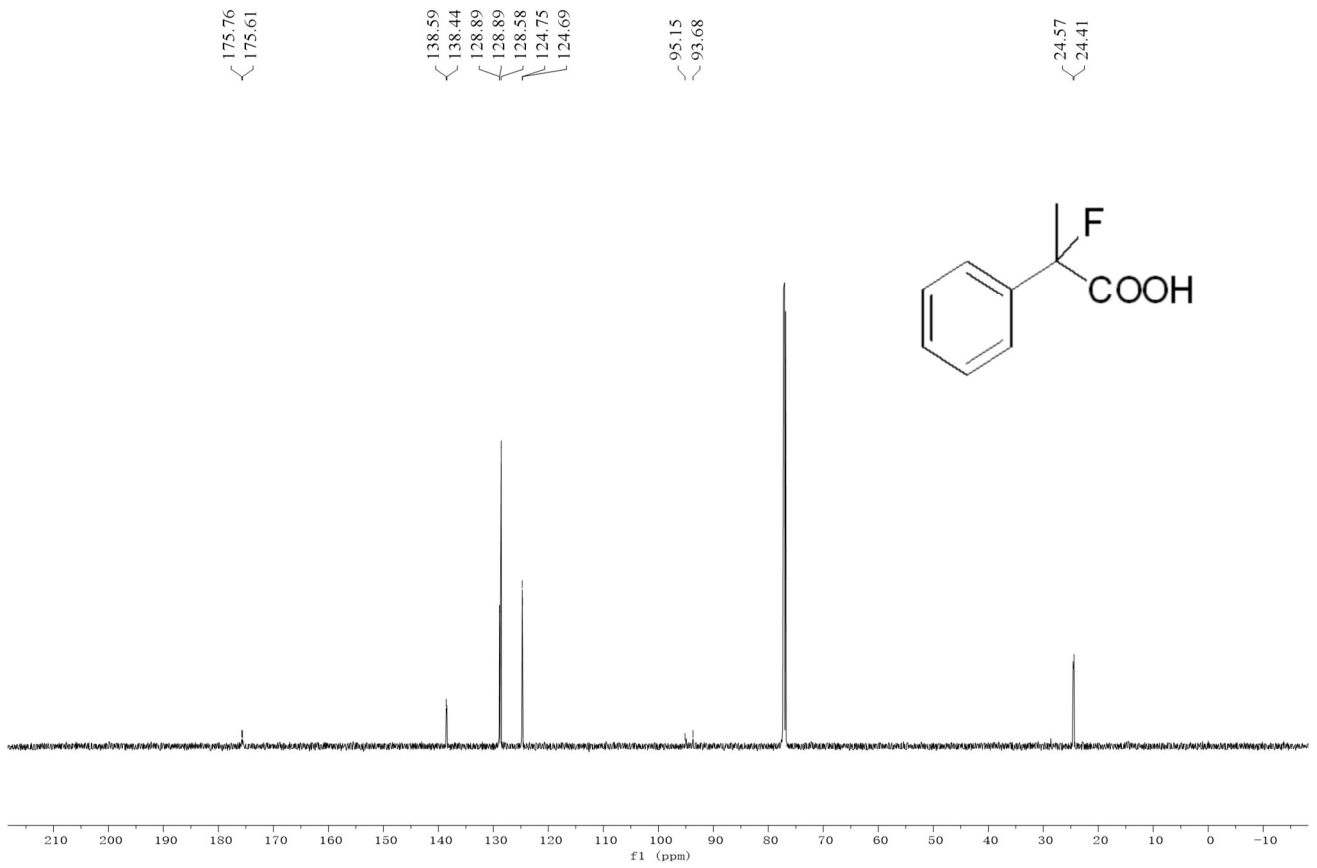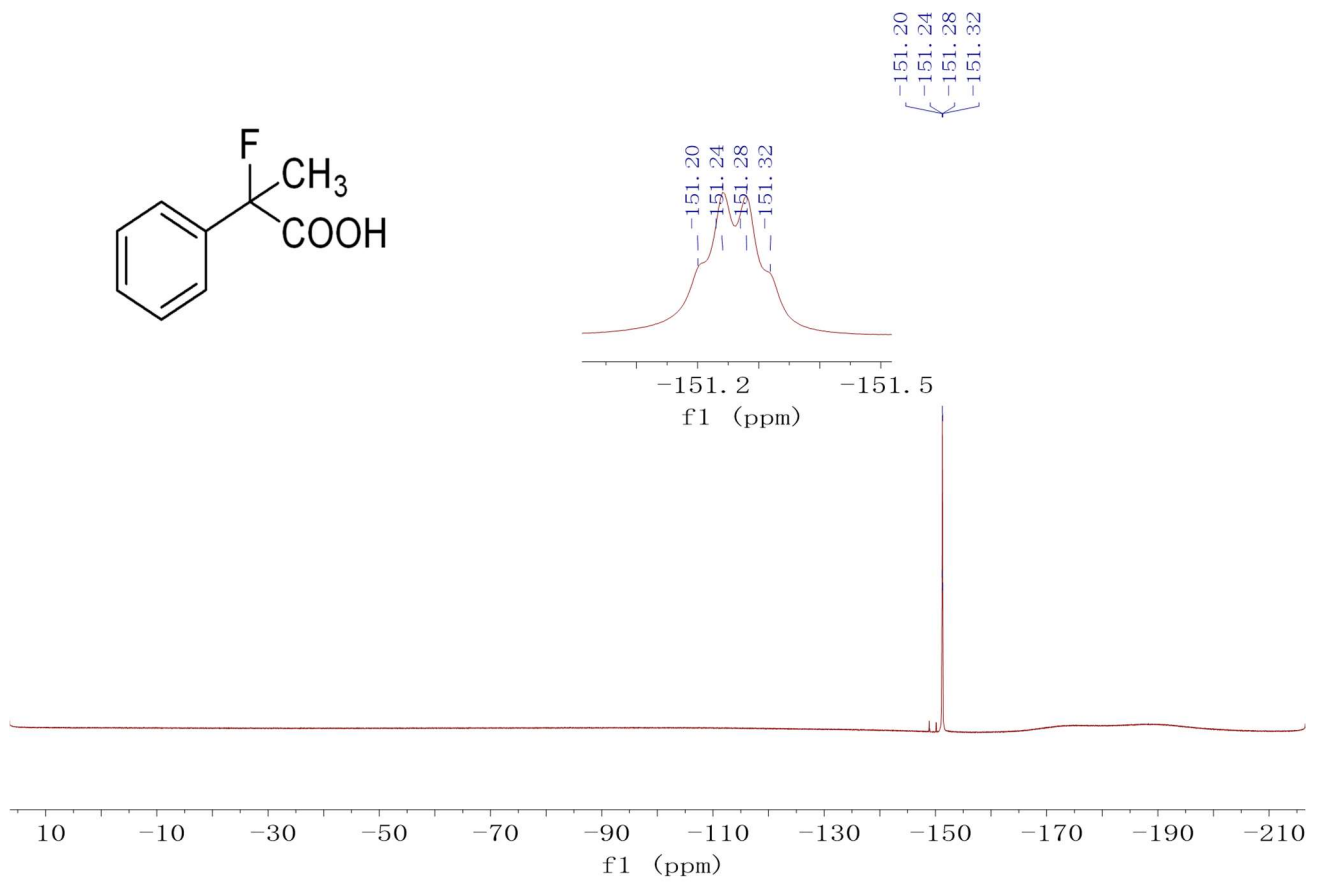

# Compound 23b

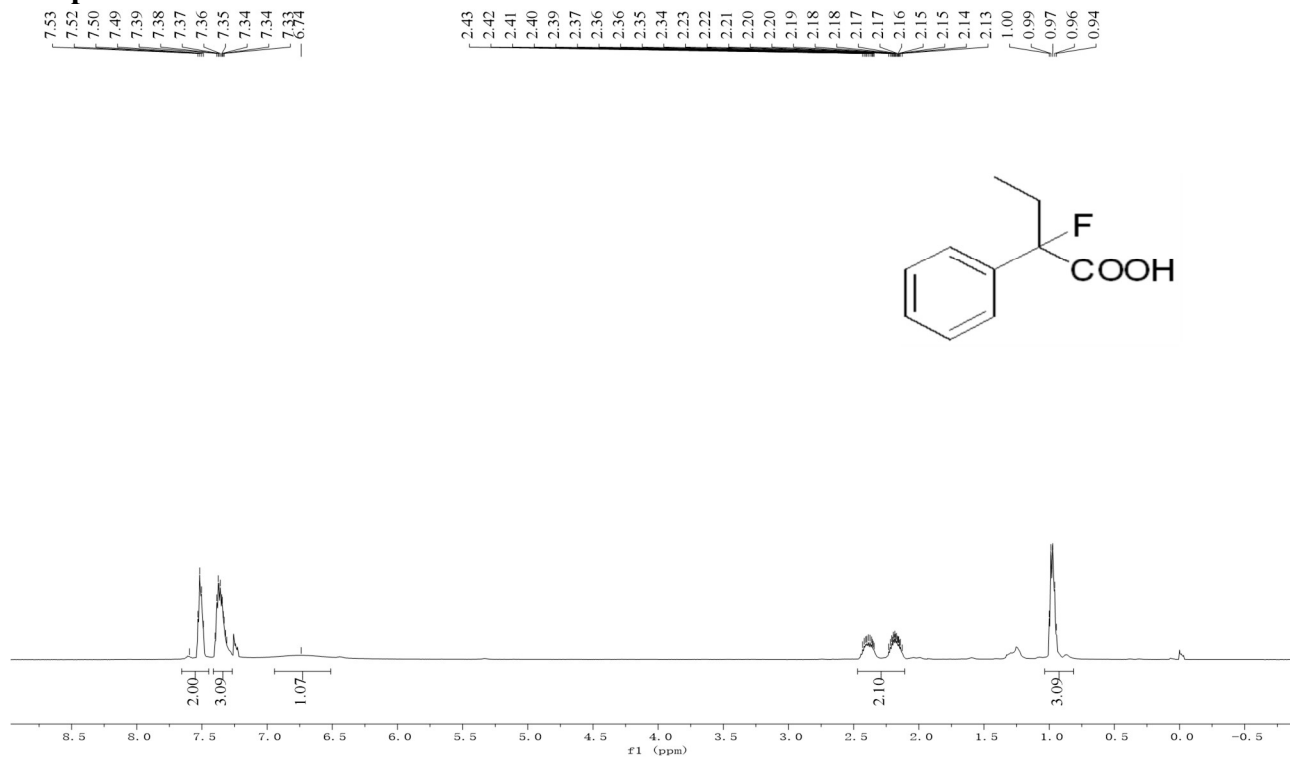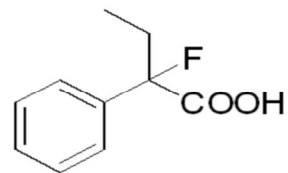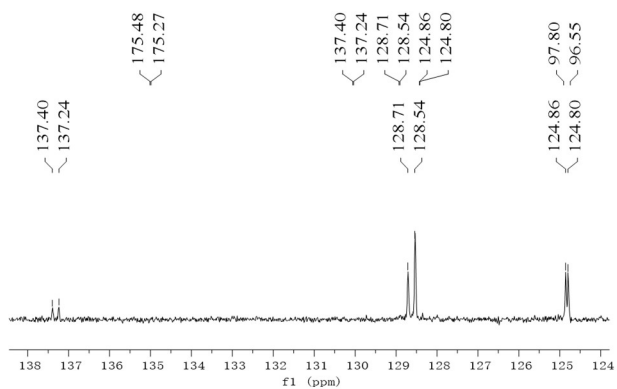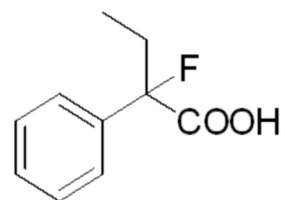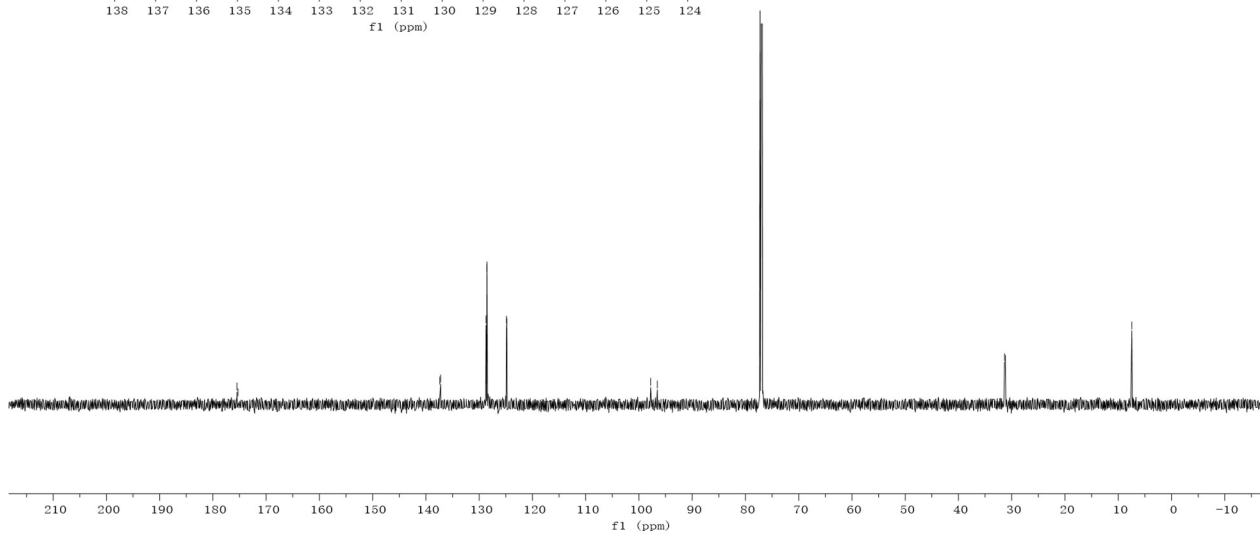

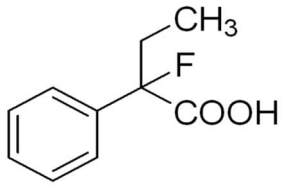

-166.72

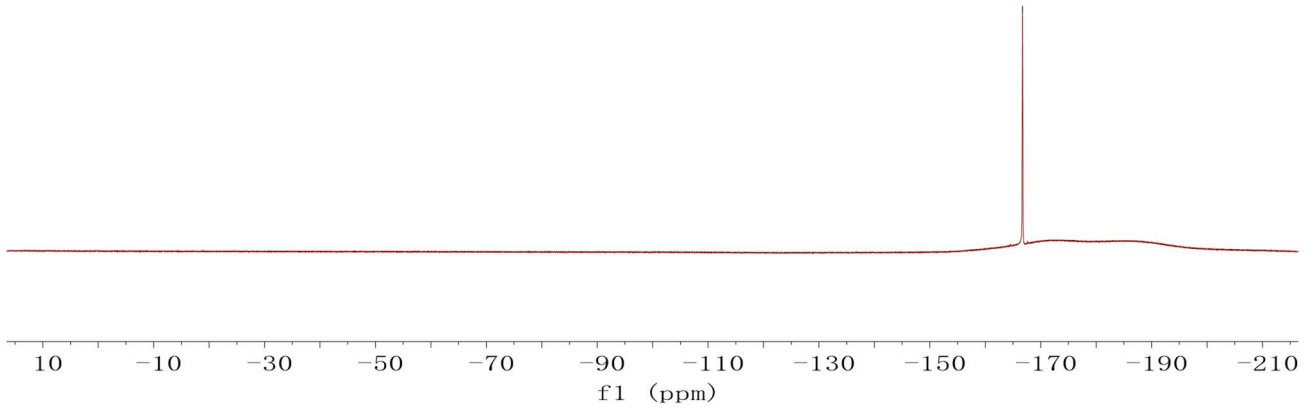

### Compound 25b

7.49  
7.48  
7.48  
7.47  
7.47  
7.39  
7.38  
7.37  
7.37  
7.30  
7.29  
7.25  
7.24  
7.24  
7.23  
7.23  
7.18  
7.18  
7.18  
7.17  
7.15  
7.15  
7.14  
7.14  
7.13  
7.12  
7.12  
7.11  
7.11  
7.10  
7.10  
7.05  
7.04  
7.03  
7.01  
7.01  
6.99  
6.98  
6.13  
6.05  
5.21  
5.19  
5.19  
5.17  
5.17  
5.12

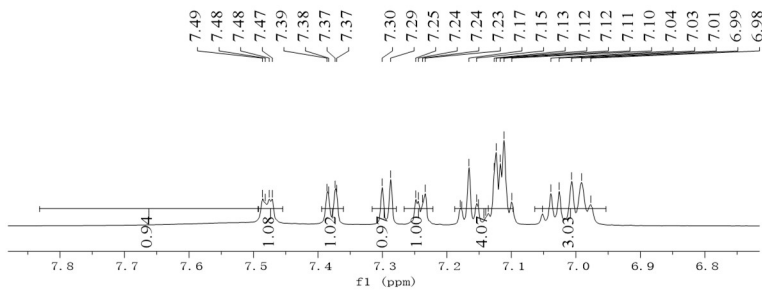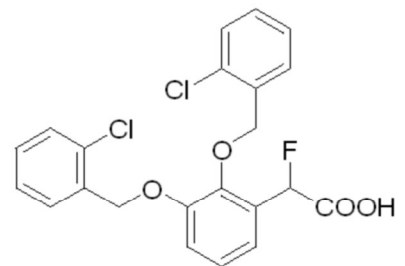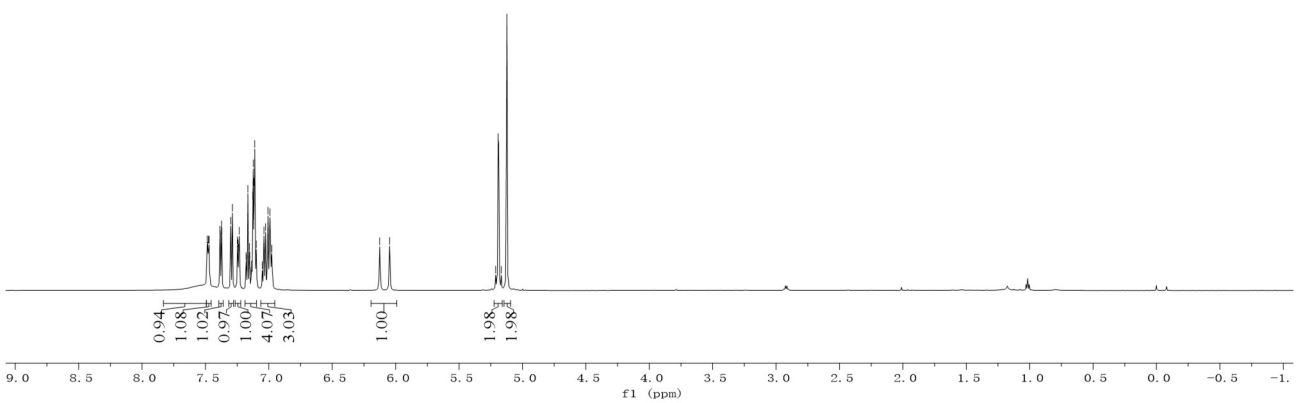

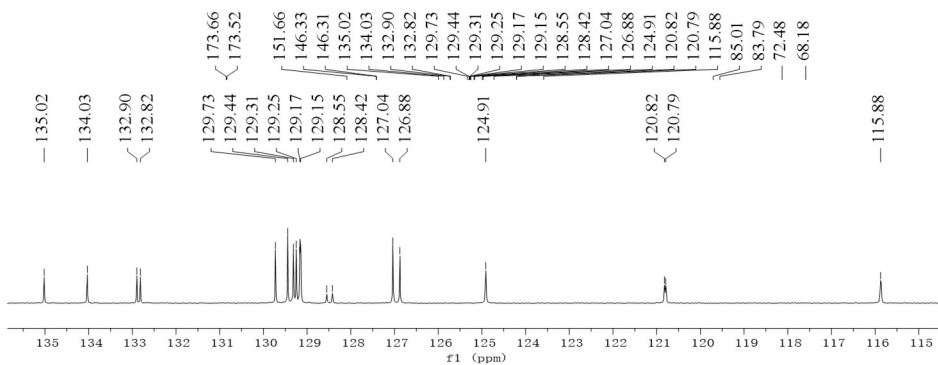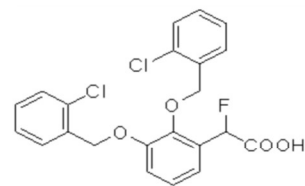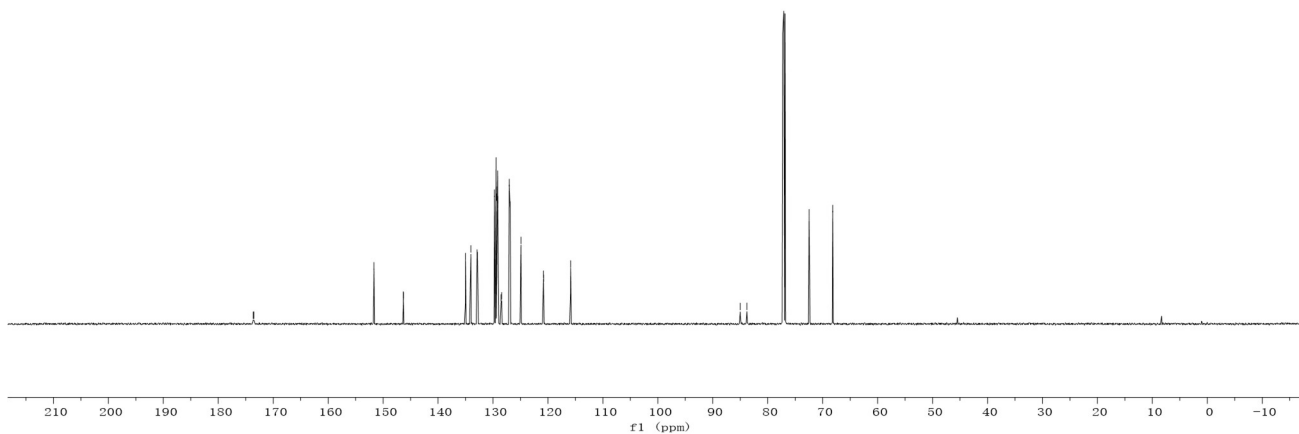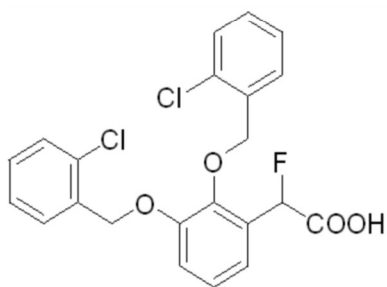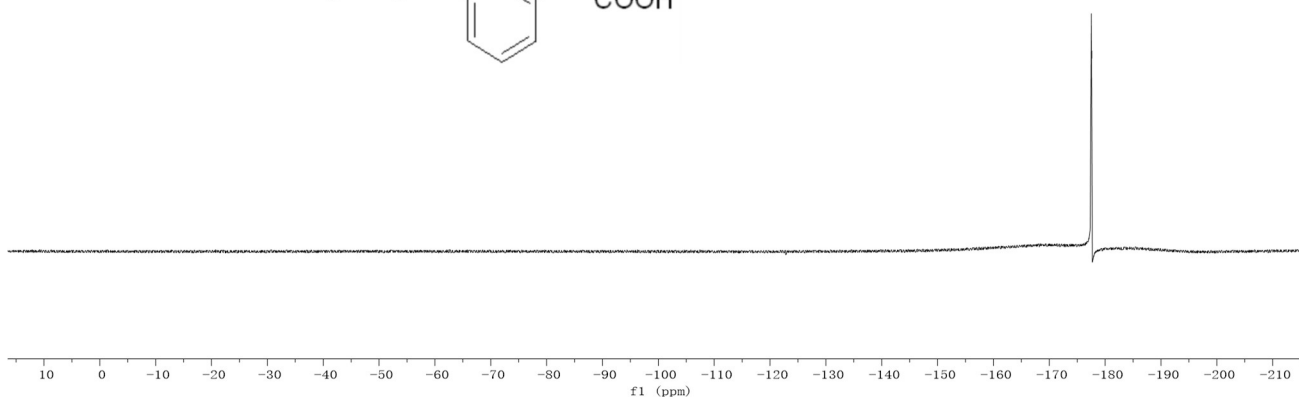

# Compound 26b

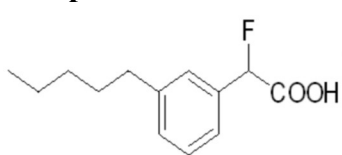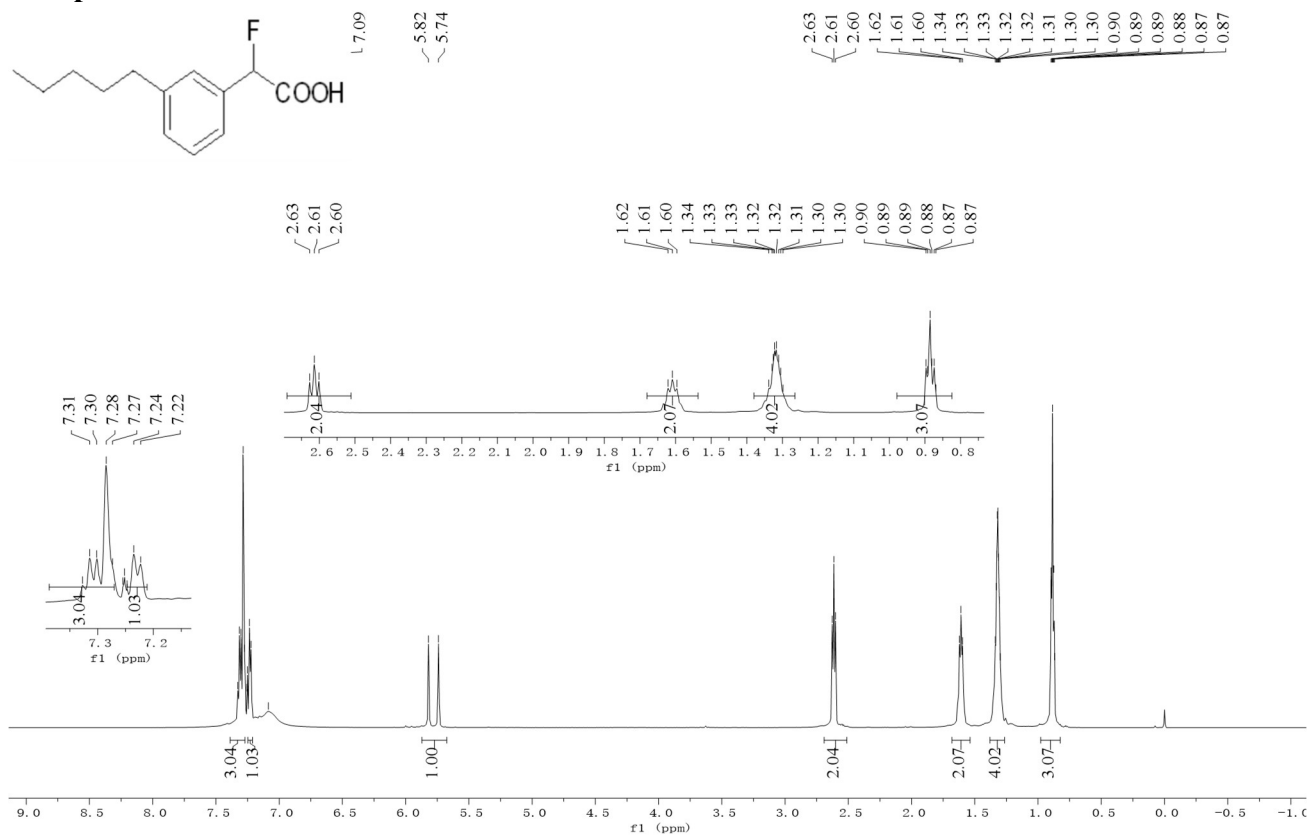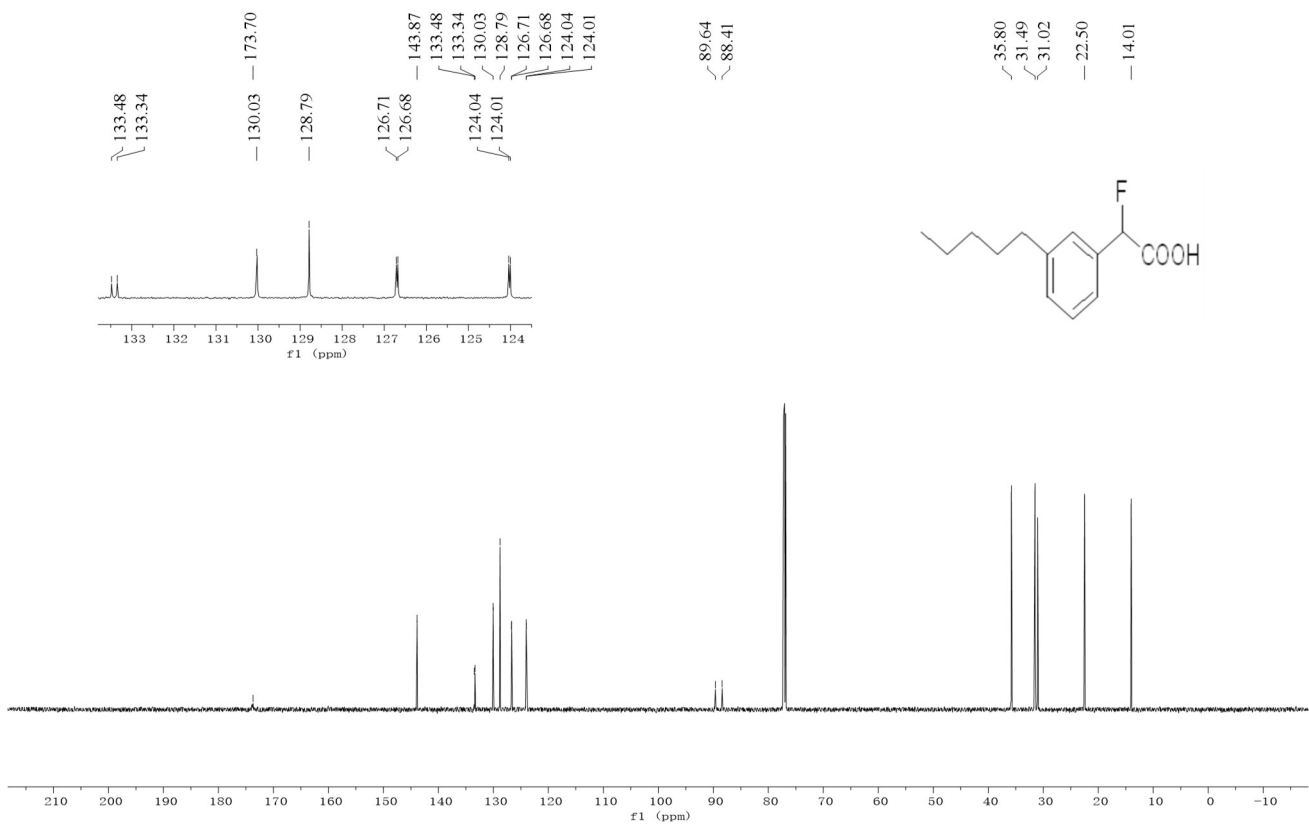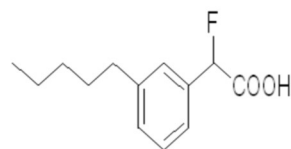

-179.86  
-179.94

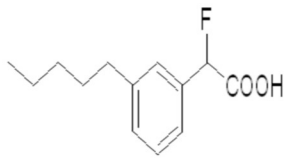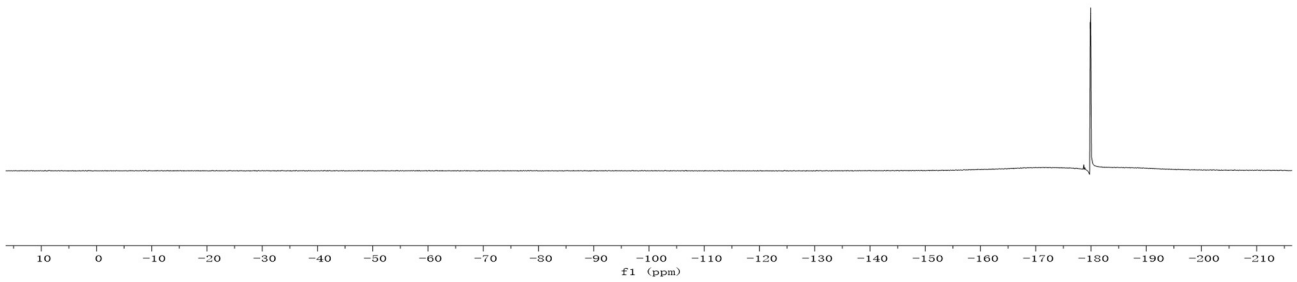

### Compound 27b

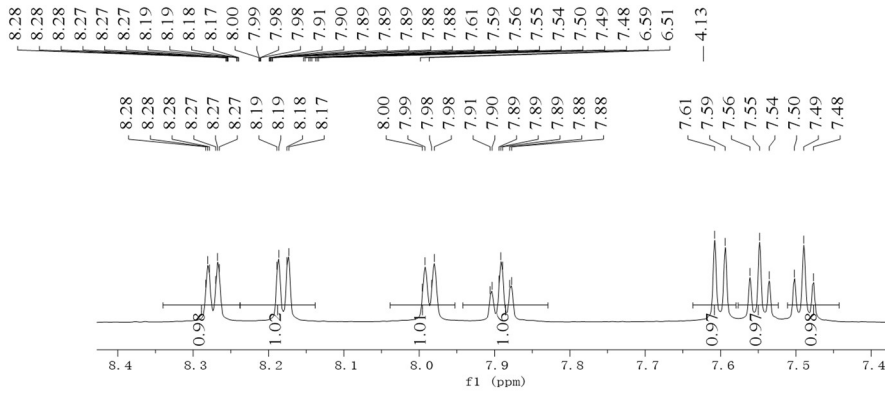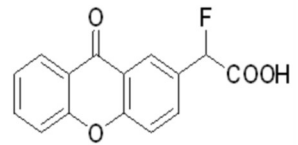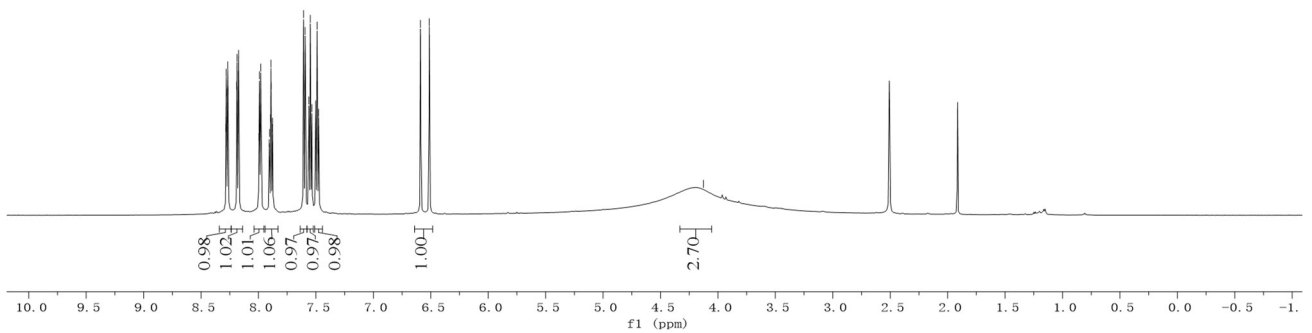

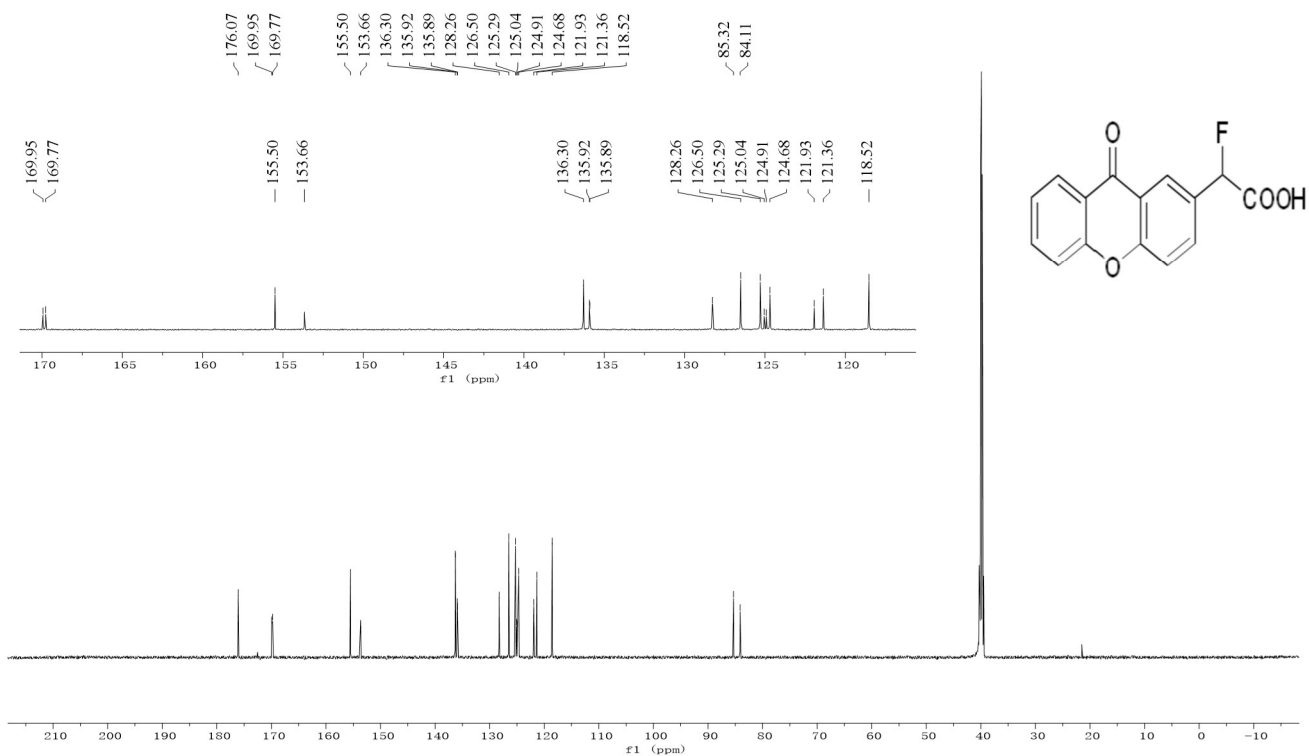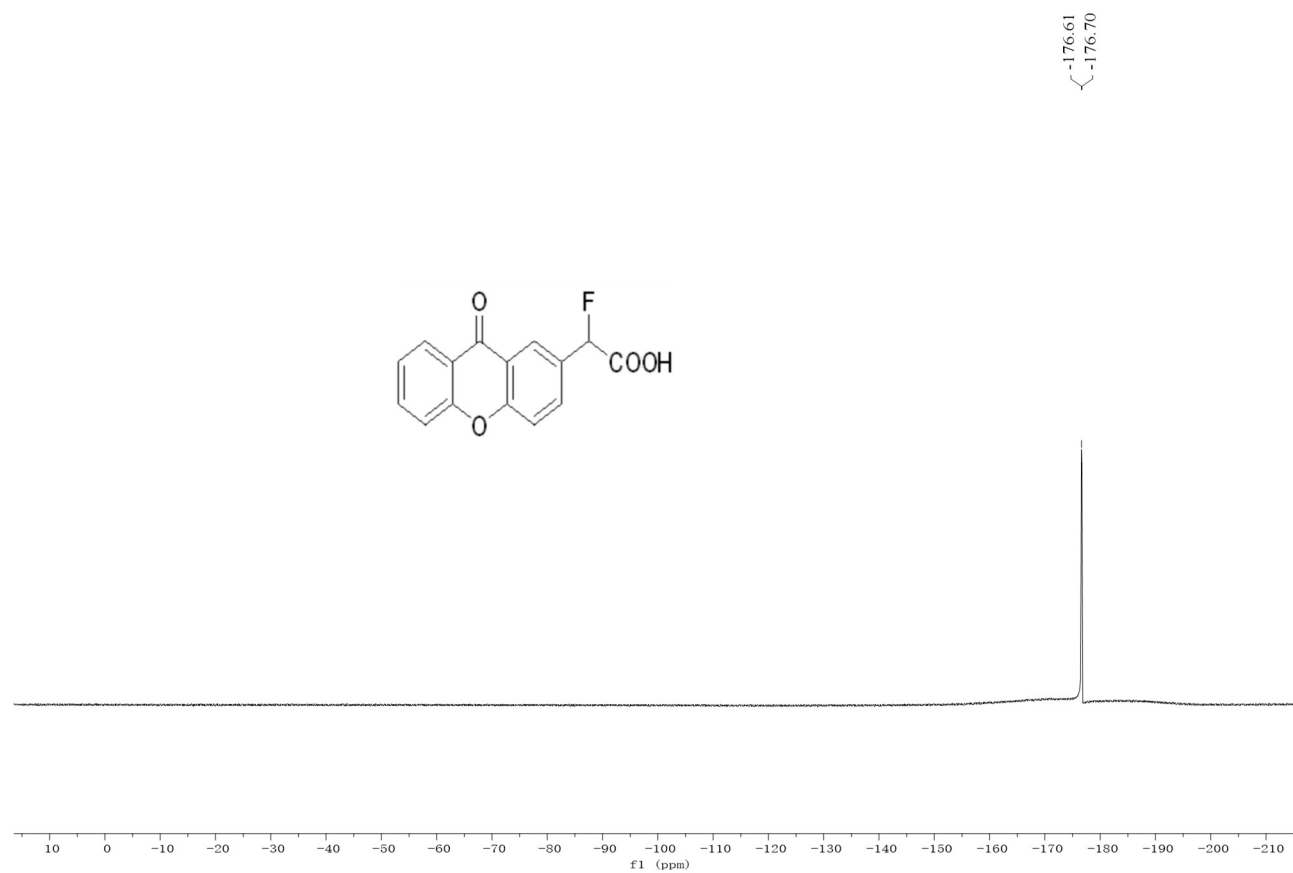

# Compound 28b

7.67  
7.66  
7.65  
7.62  
7.61  
7.56  
7.55  
7.54  
7.49  
7.48  
7.47  
7.45  
7.43  
7.43  
6.16  
6.08

7.67  
7.66  
7.65  
7.62  
7.61  
7.56  
7.55  
7.54  
7.49  
7.48  
7.47  
7.45  
7.43  
7.43

3.72

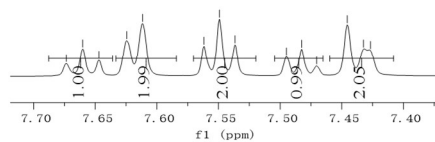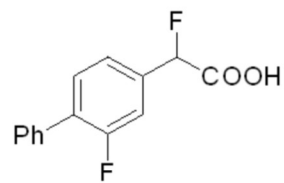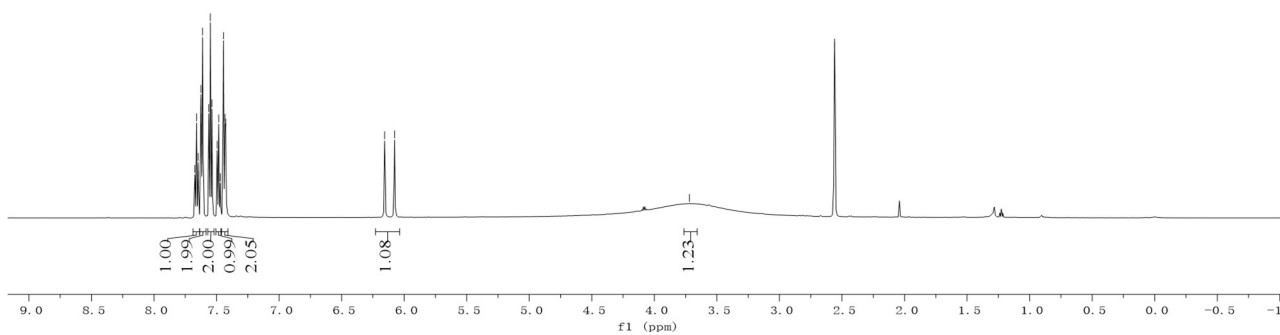

169.88  
169.70  
160.06  
158.43  
137.37  
137.32  
137.23  
137.19  
134.91  
131.72  
131.70  
129.58  
129.49  
129.28  
129.15  
128.64  
123.62  
123.59  
123.56  
115.09  
115.05  
114.93  
114.89  
88.96  
87.76

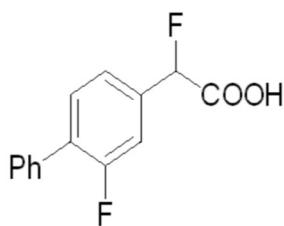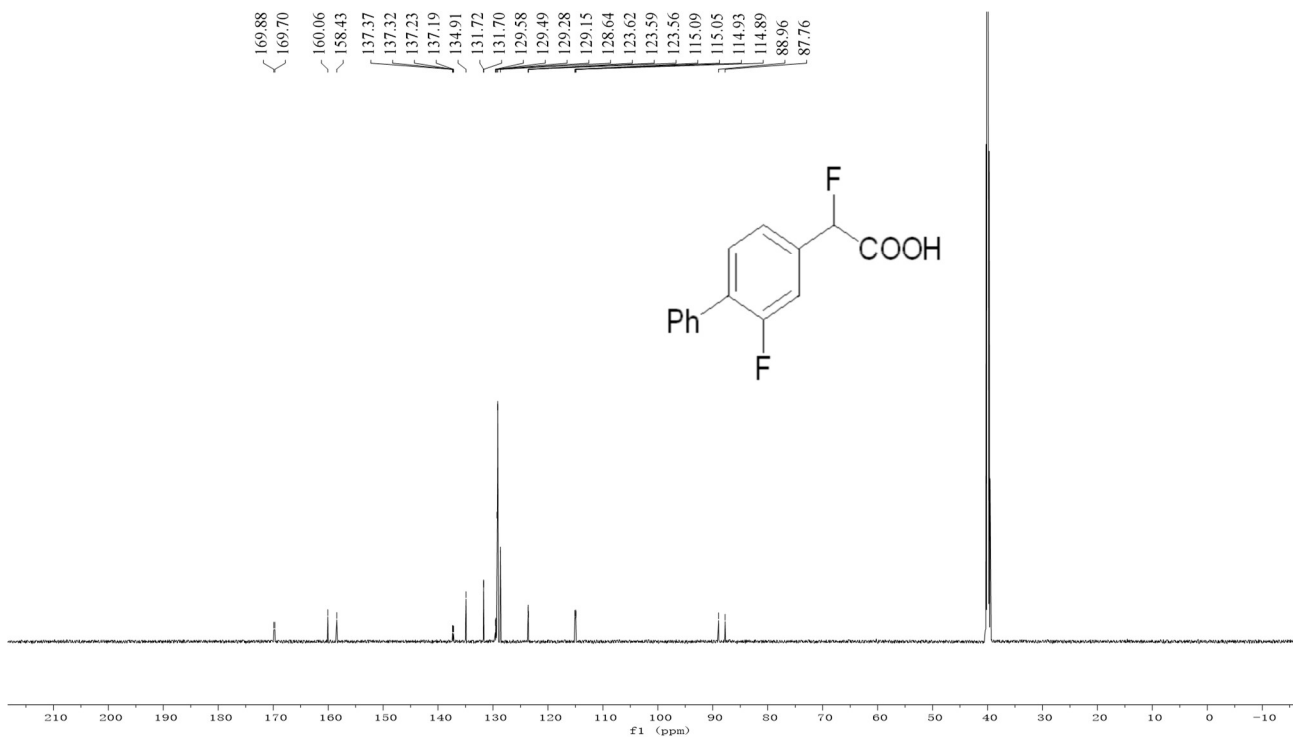



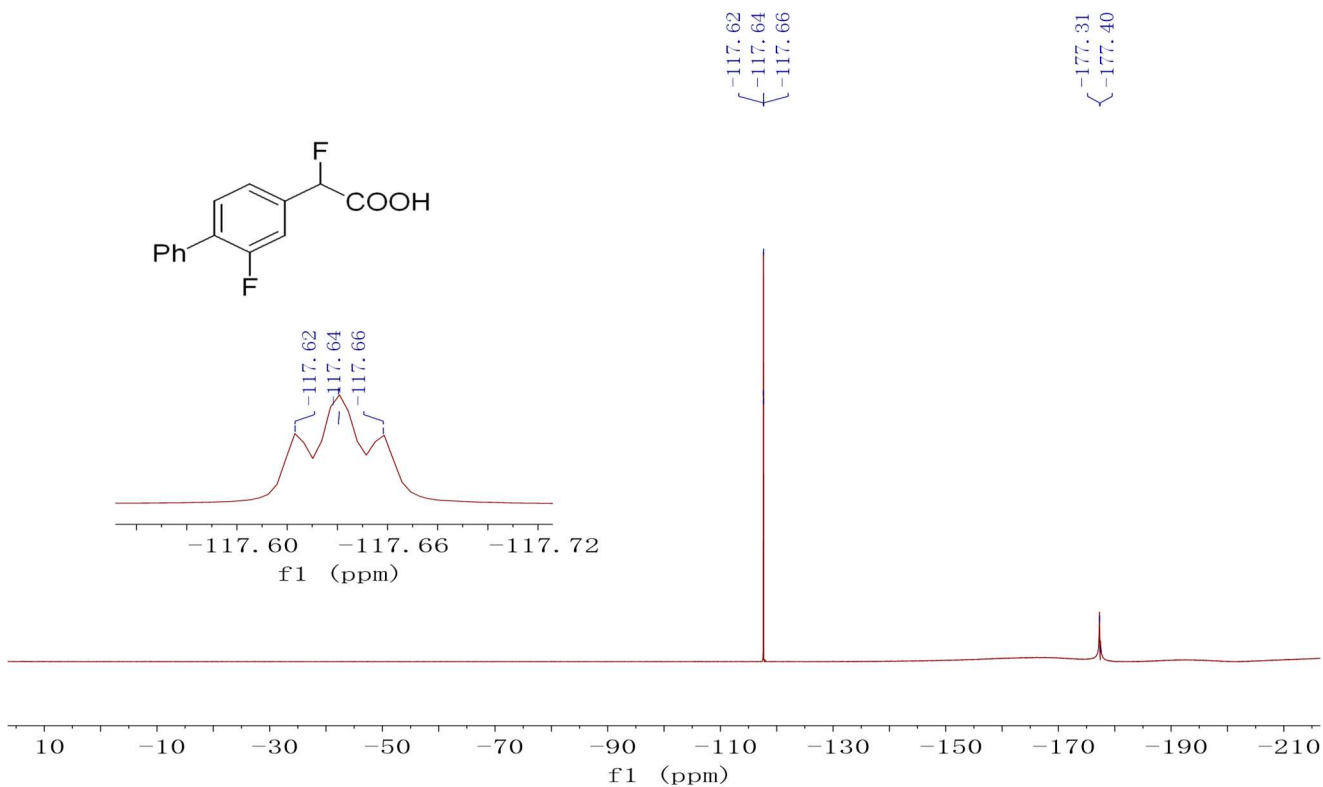

### Compound 29b

WCL-2674

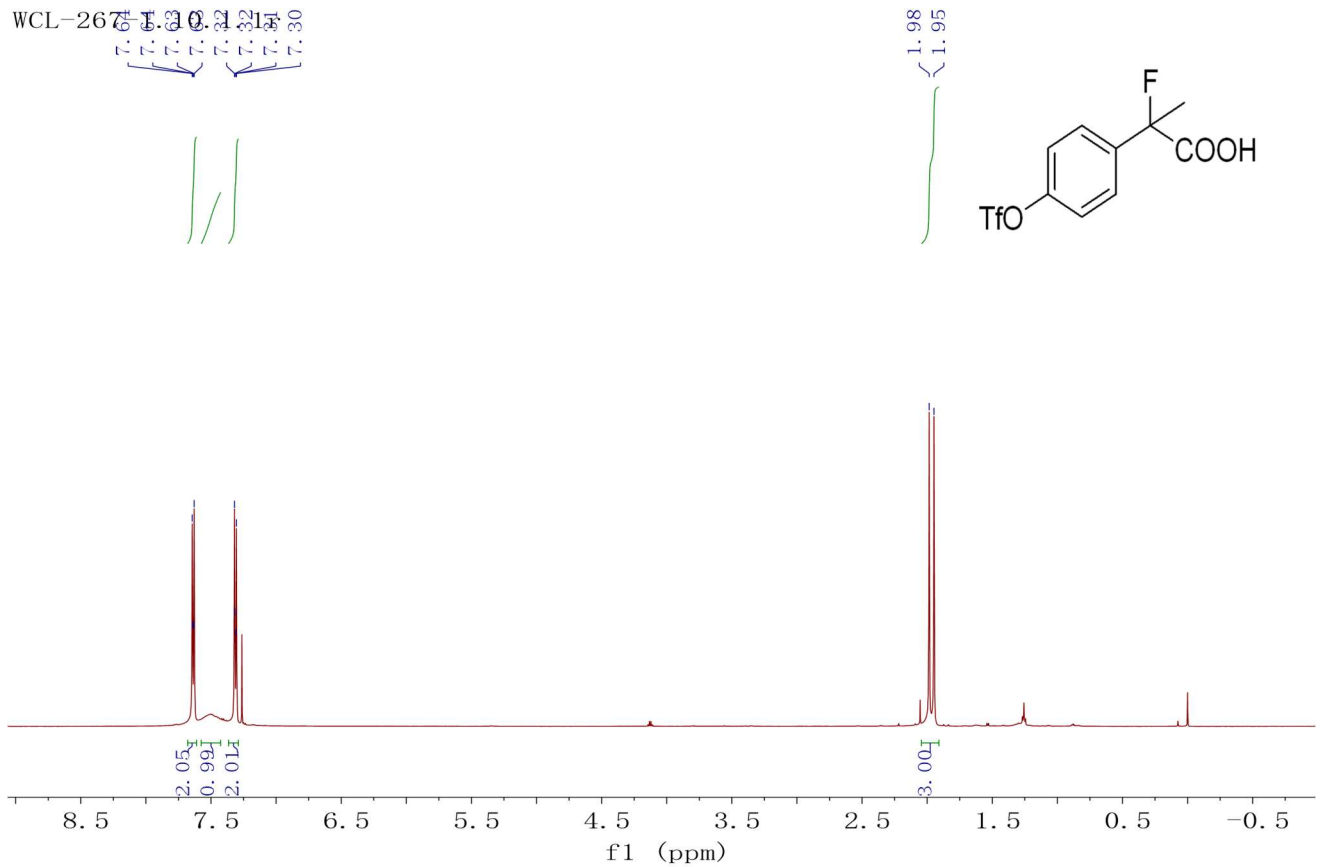

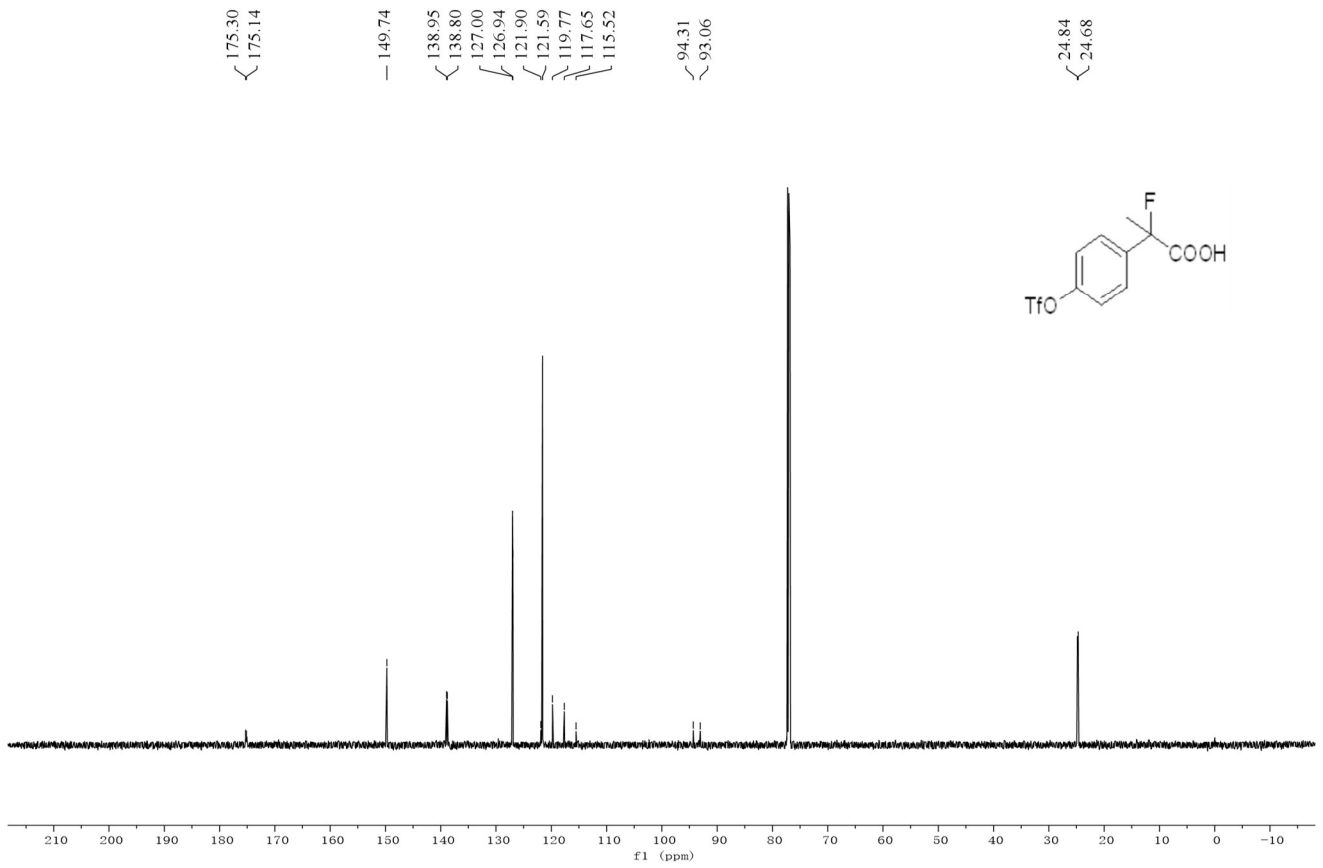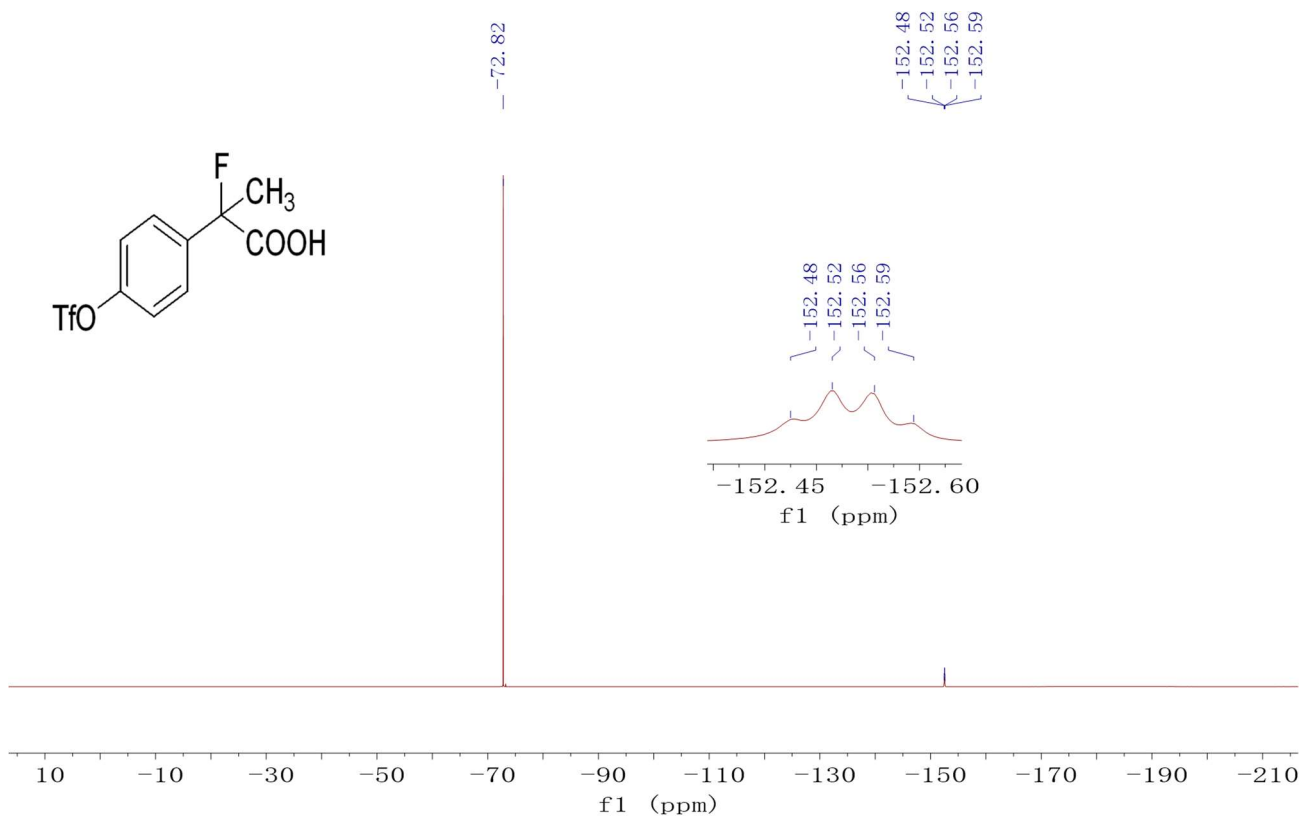

# Compound 30b

WCL-333. 10. 1. 30

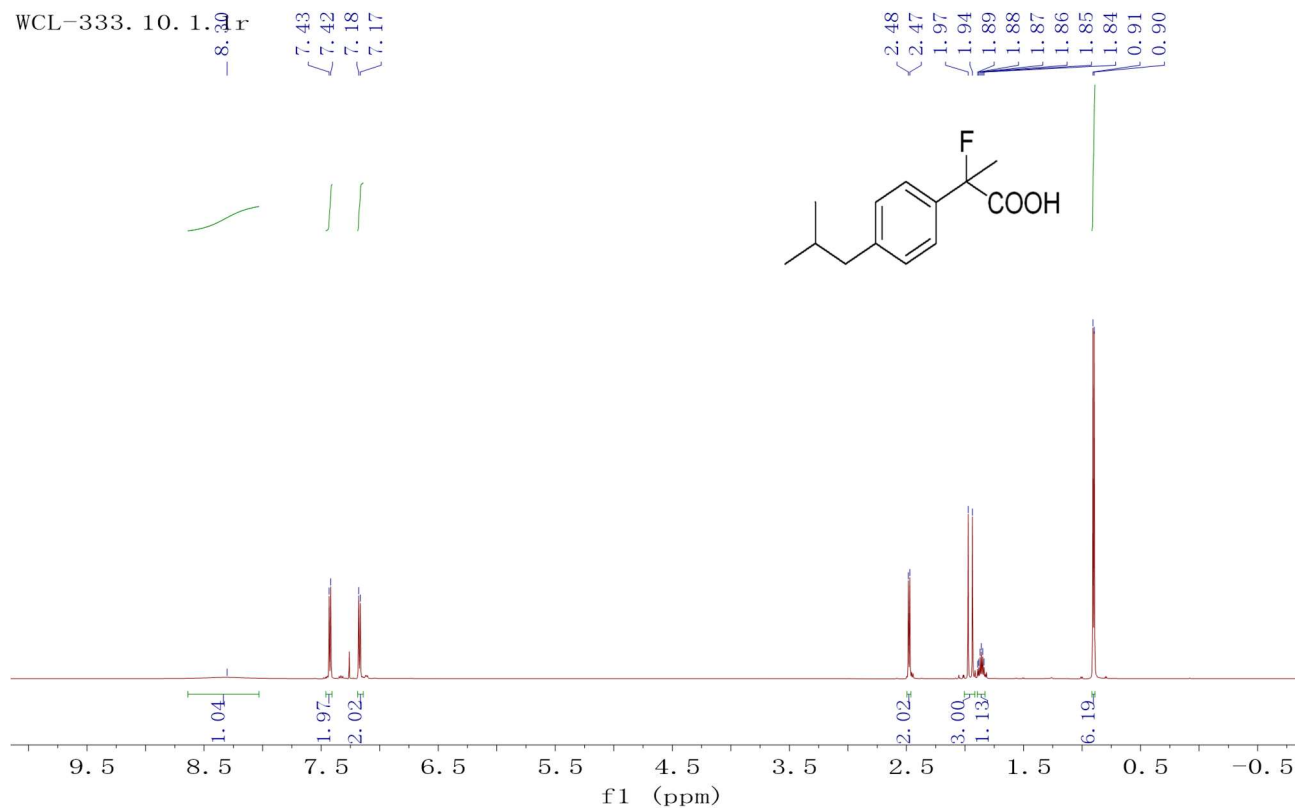

WCL-333. 11. 1. 48

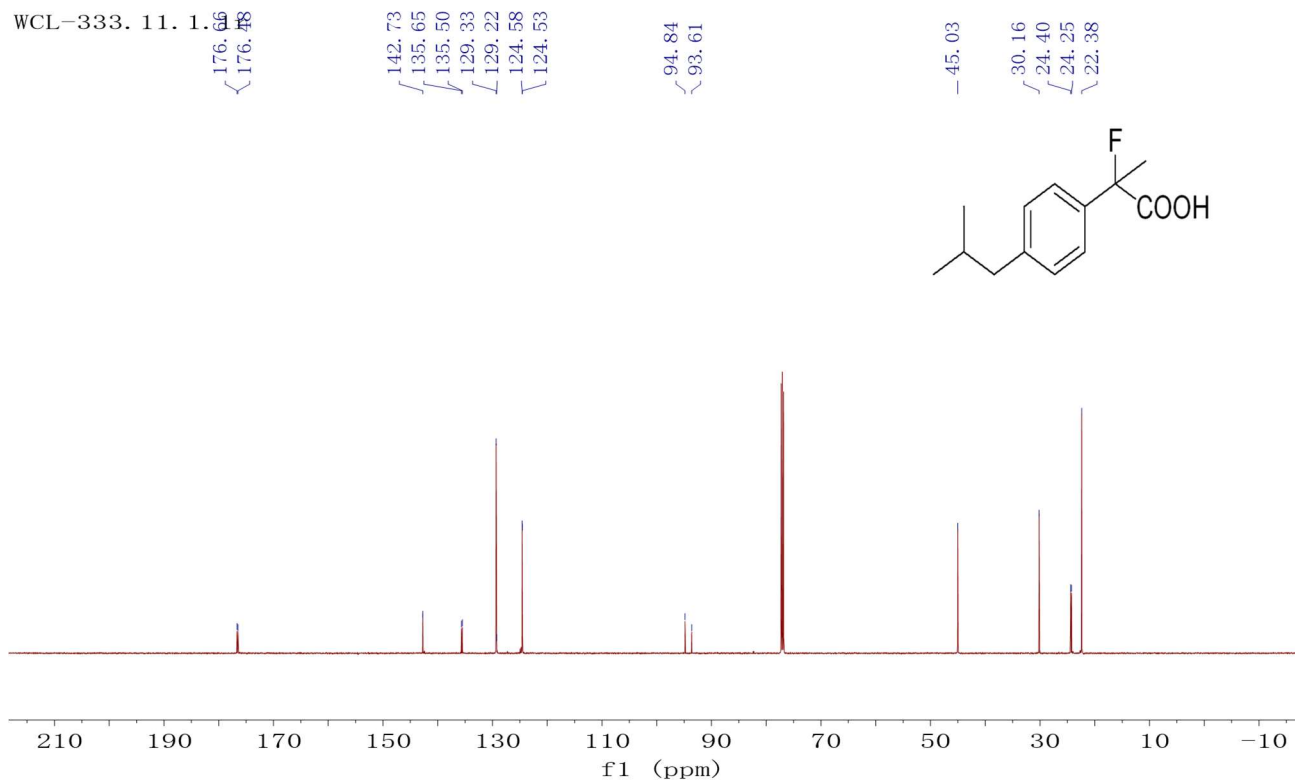

WCL-333. 12. 1. 1r

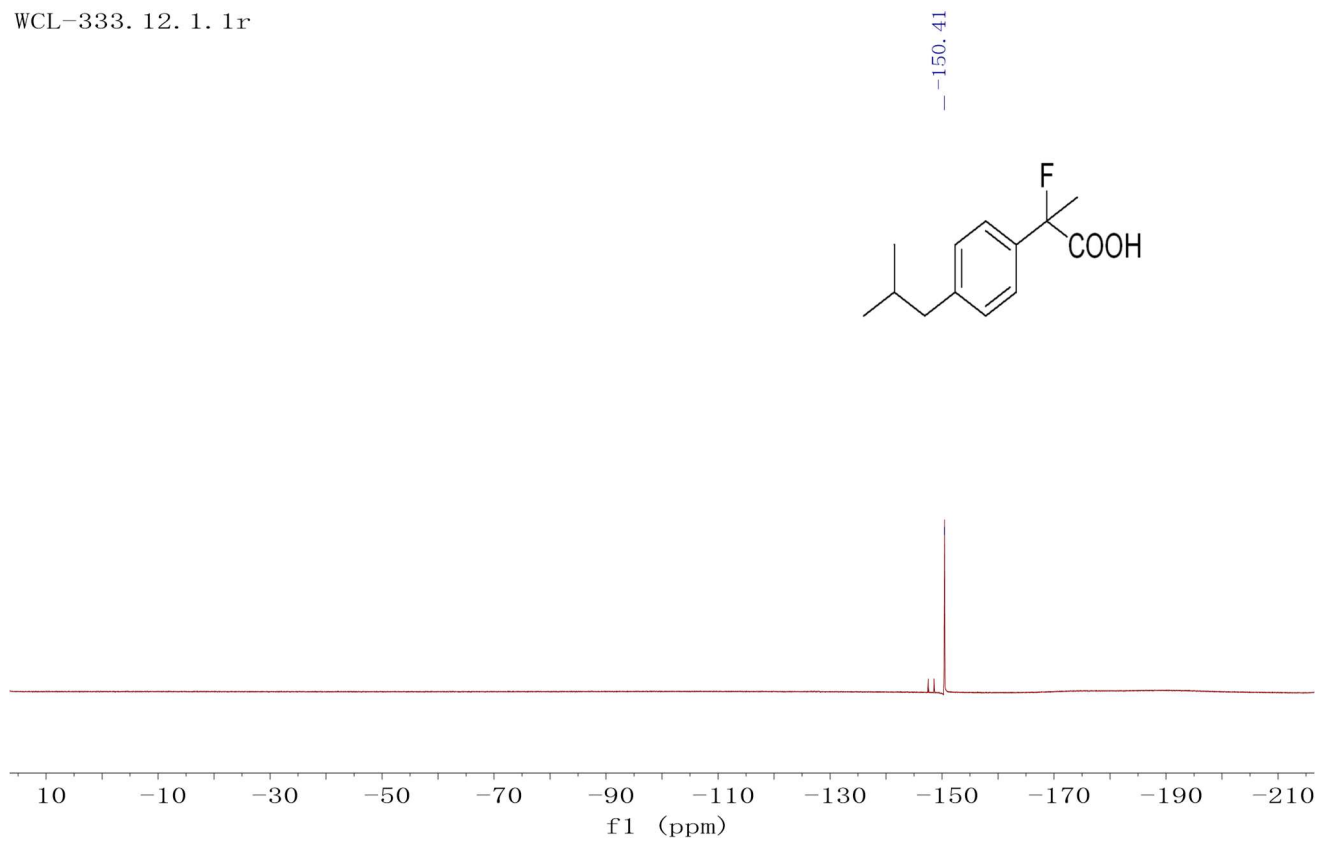

### Compound 31b

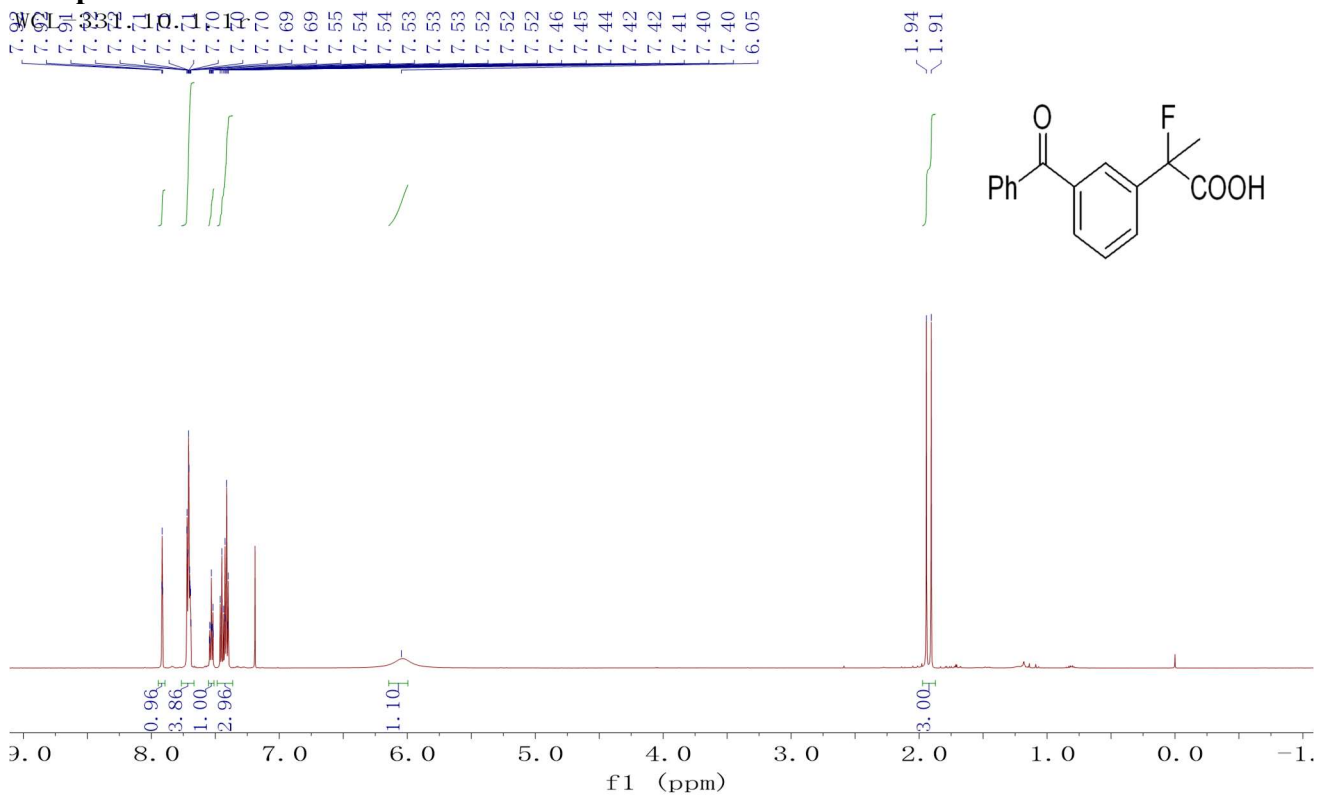

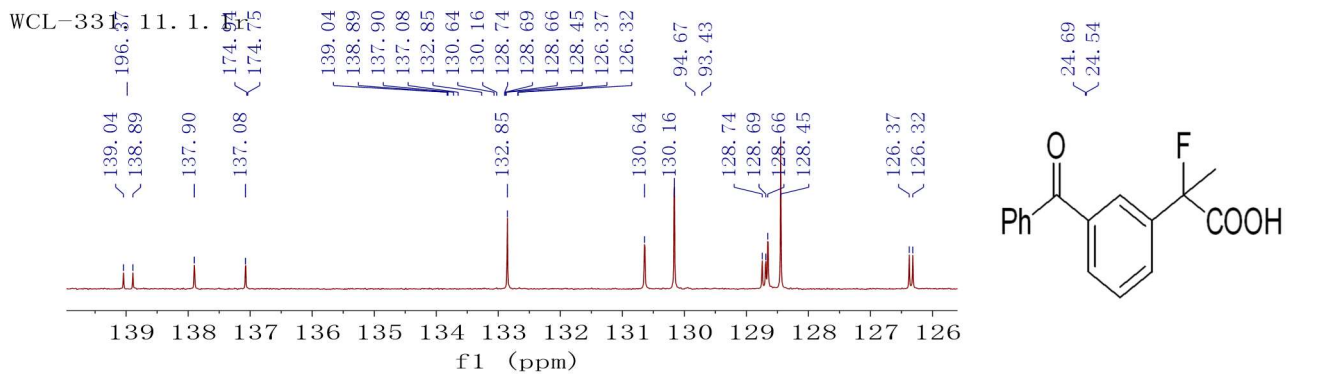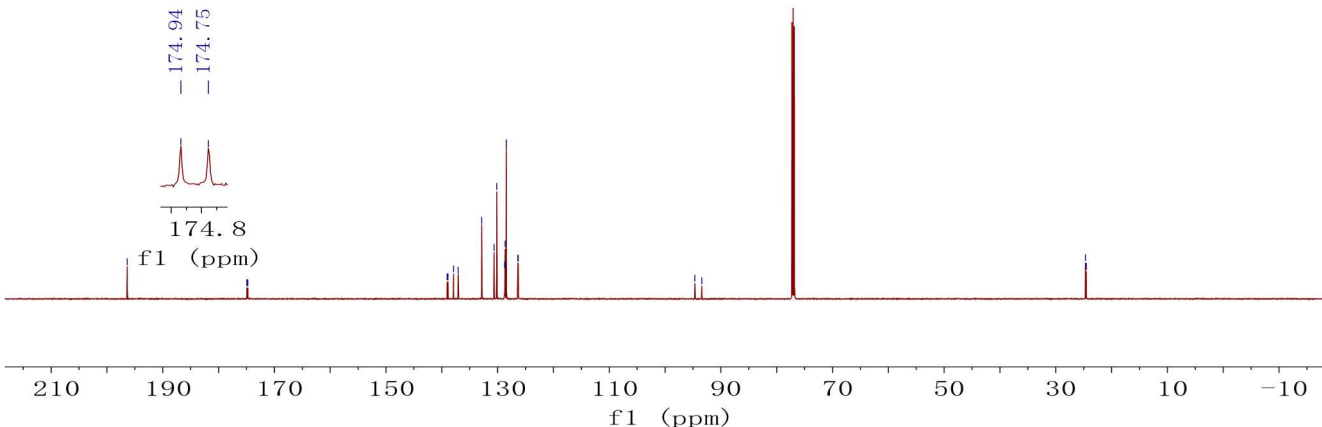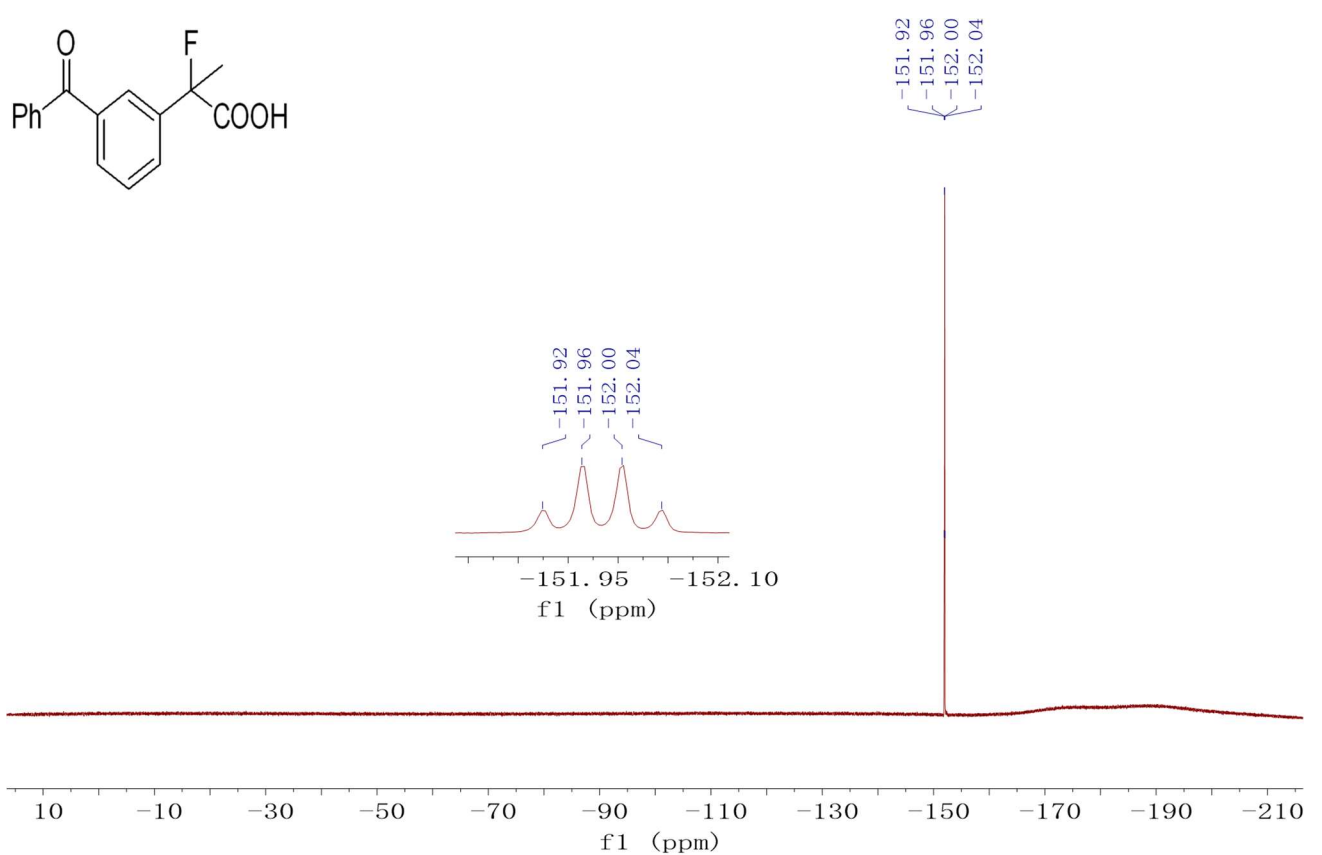

# Compound 32b

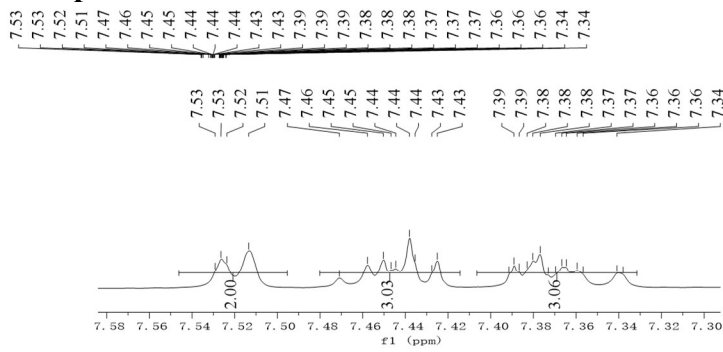

2.00  
1.96

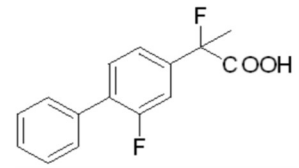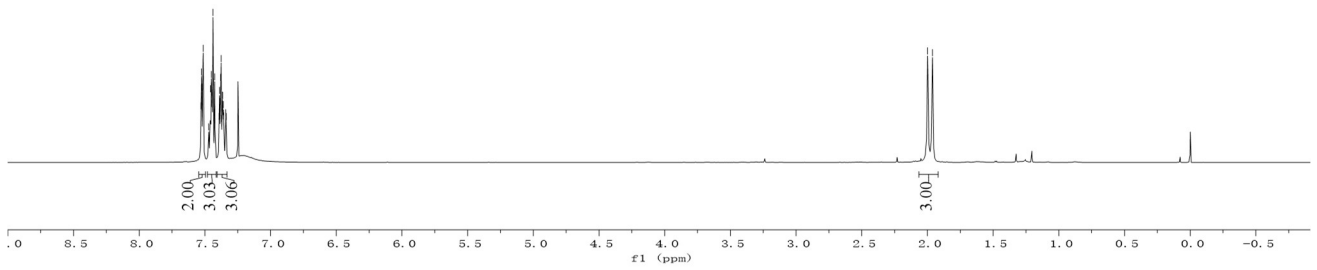

175.94, 160.40, 158.75, 139.78, 139.73, 139.62, 139.57, 134.98, 131.00, 130.98, 129.71, 129.62, 129.99, 128.97, 128.55, 128.04, 120.76, 120.74, 120.71, 120.68, 113.17, 113.12, 113.01, 112.94, 94.38, 93.13.

24.66  
24.51

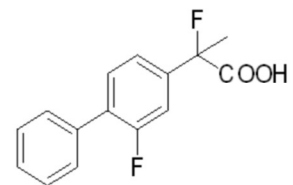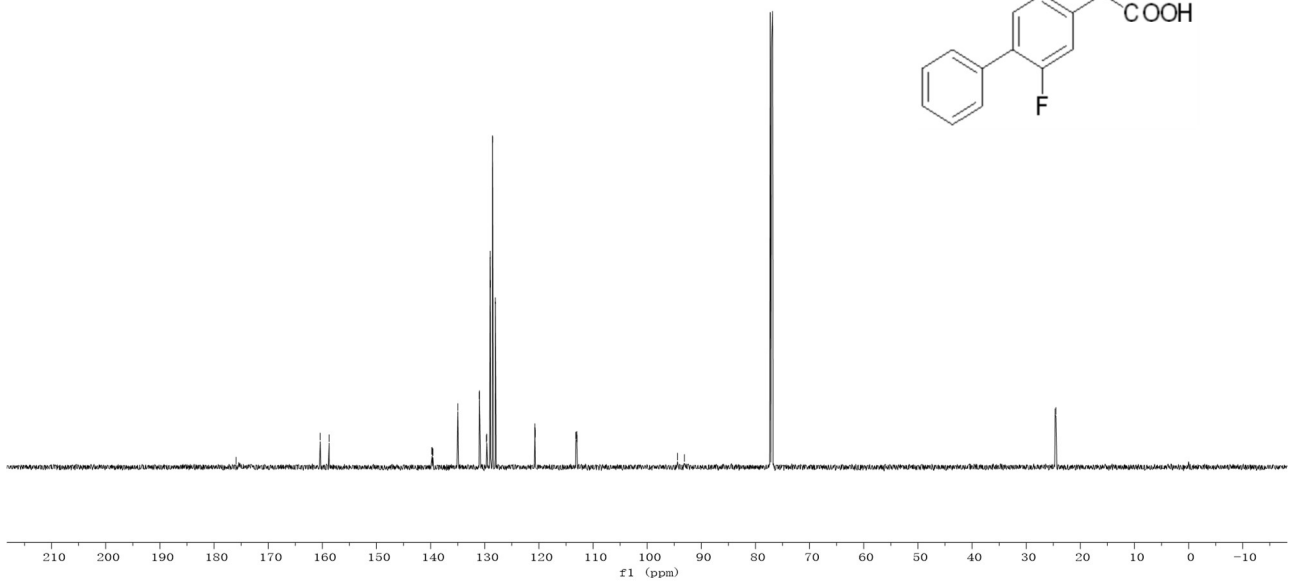

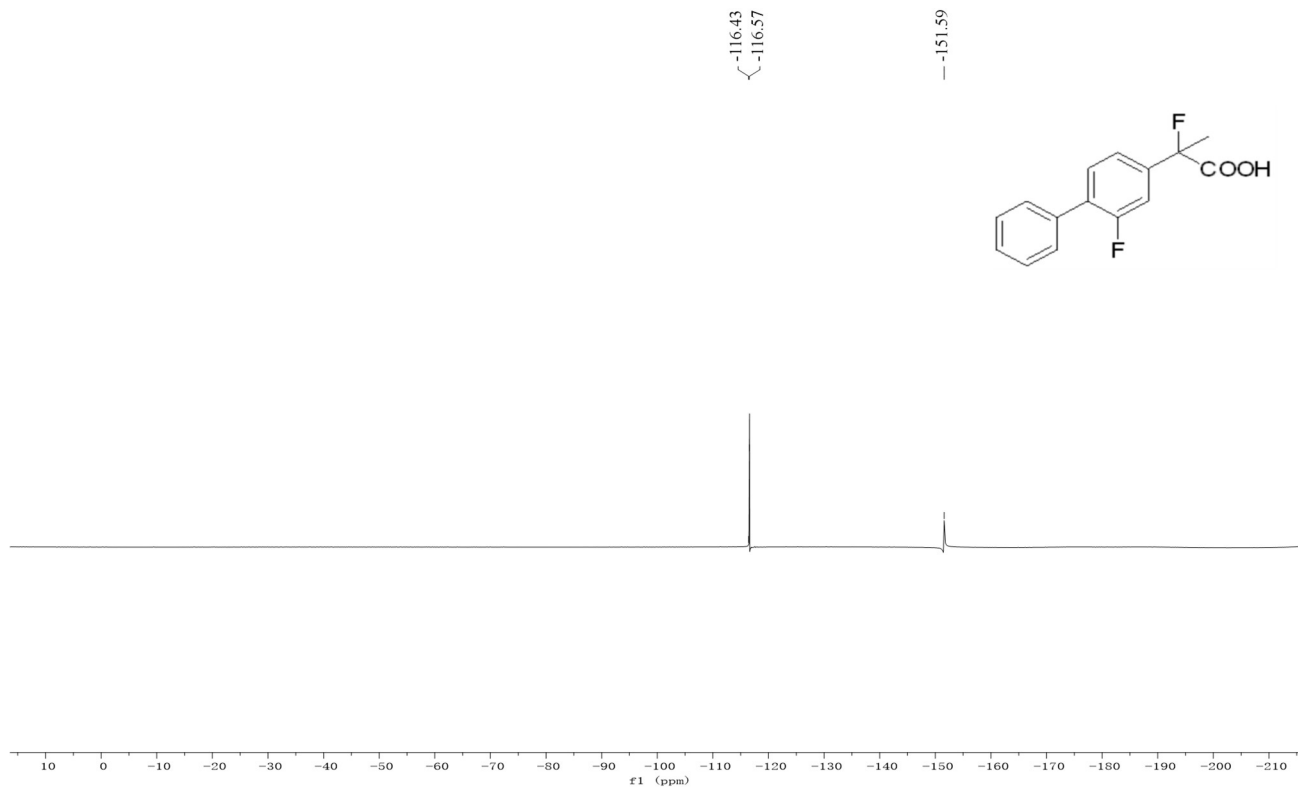

### Compound 33b

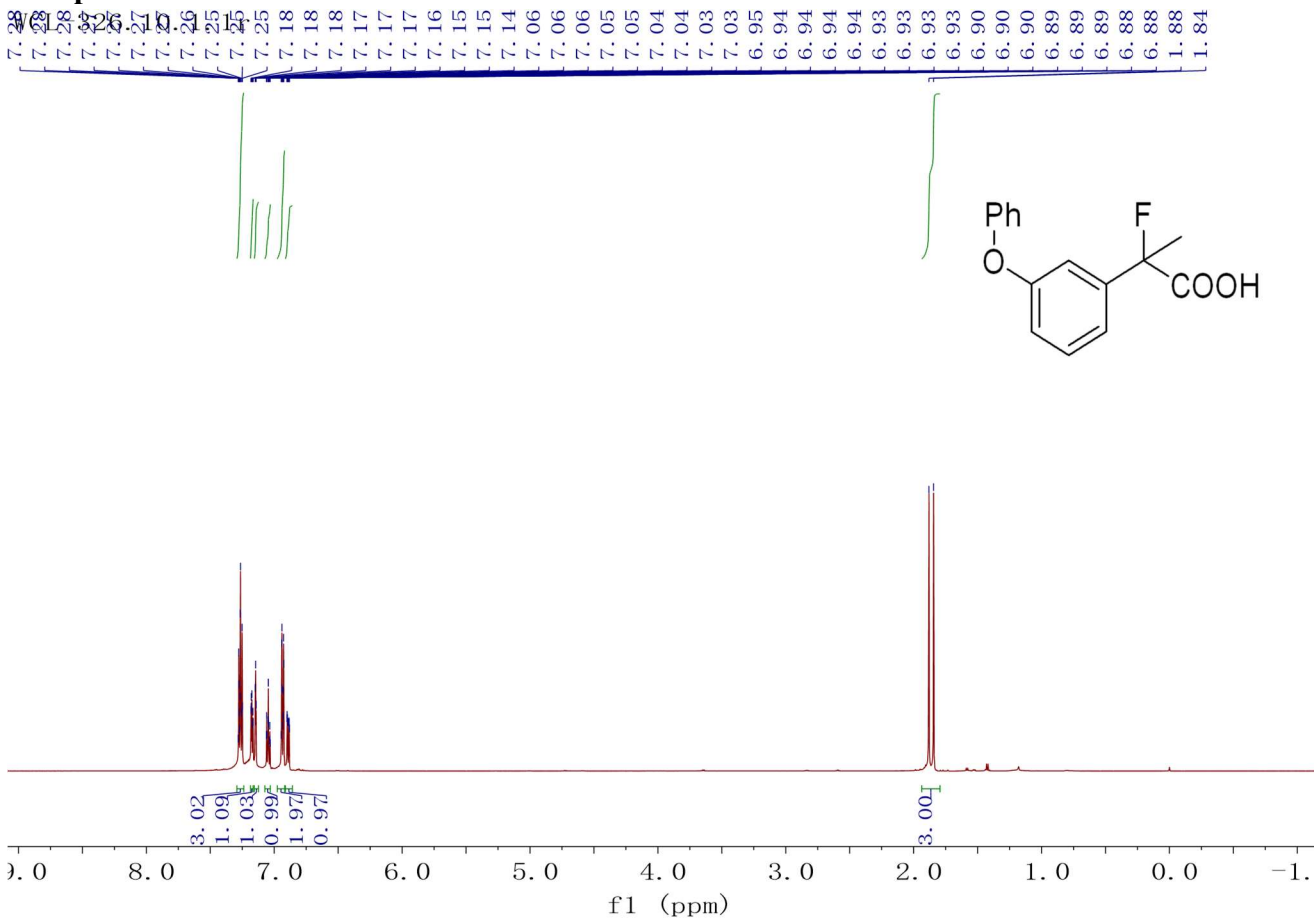

WCL-326. 11. 1. 1.

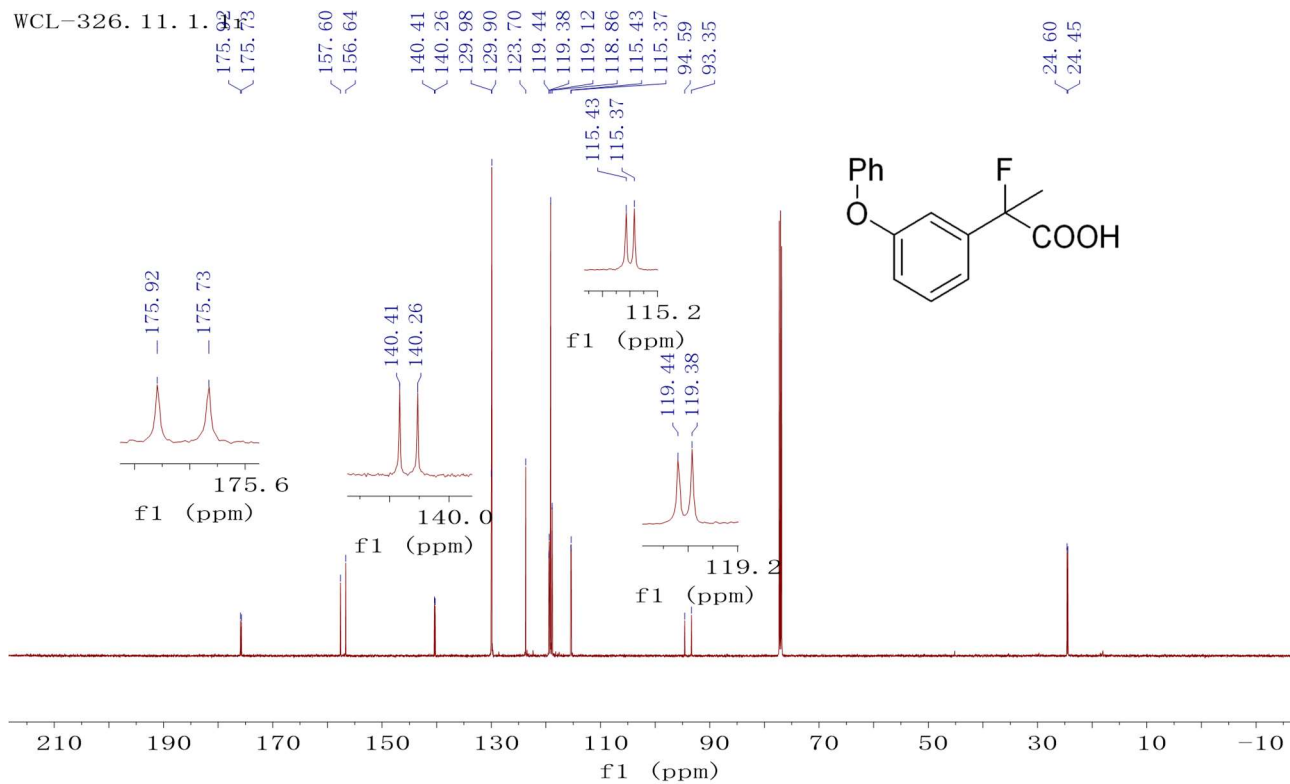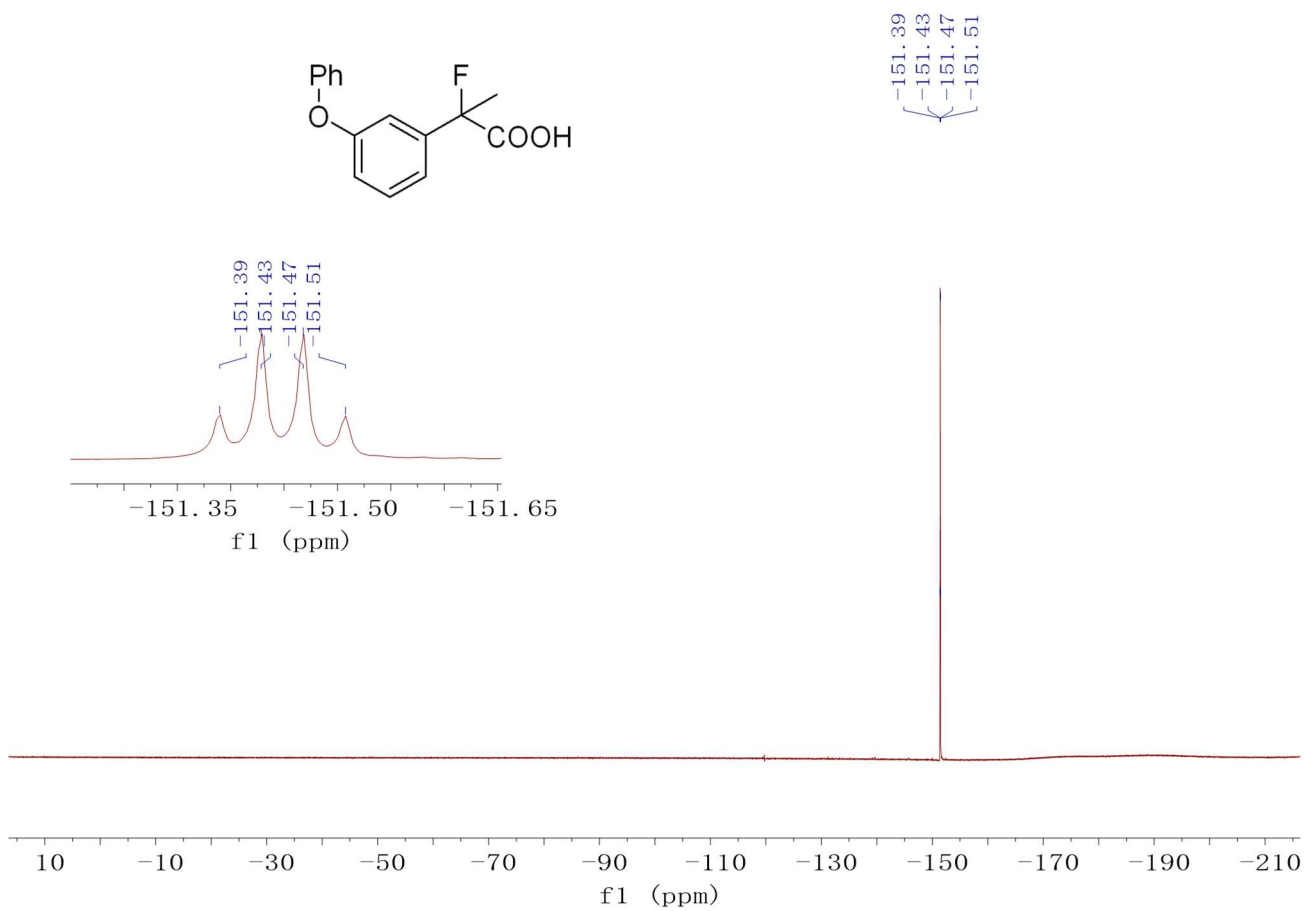



# Compound 34b

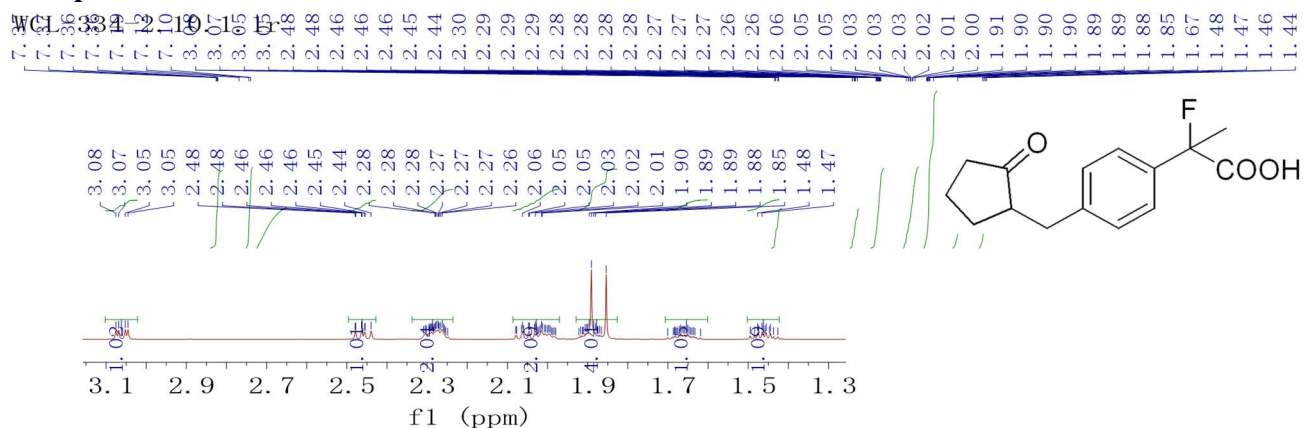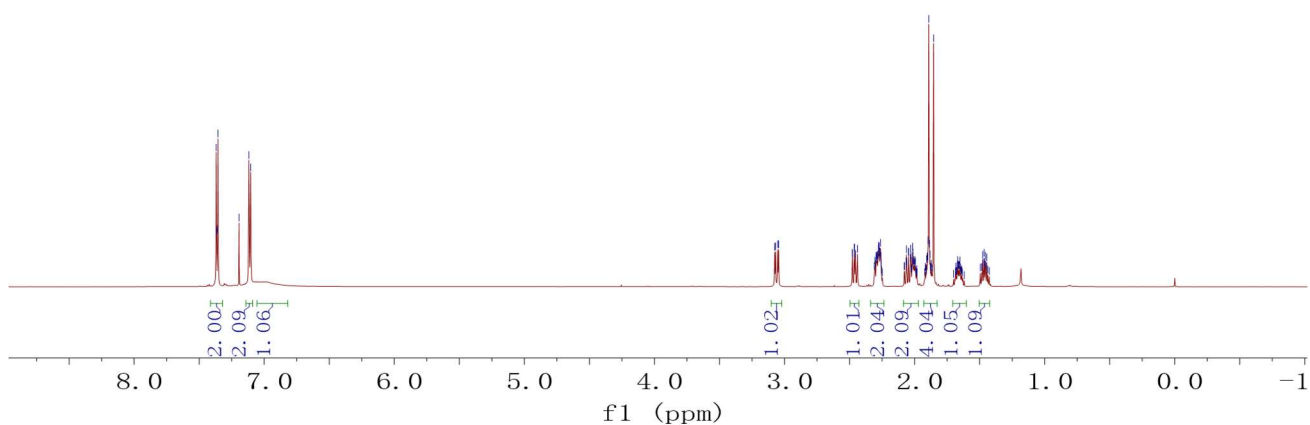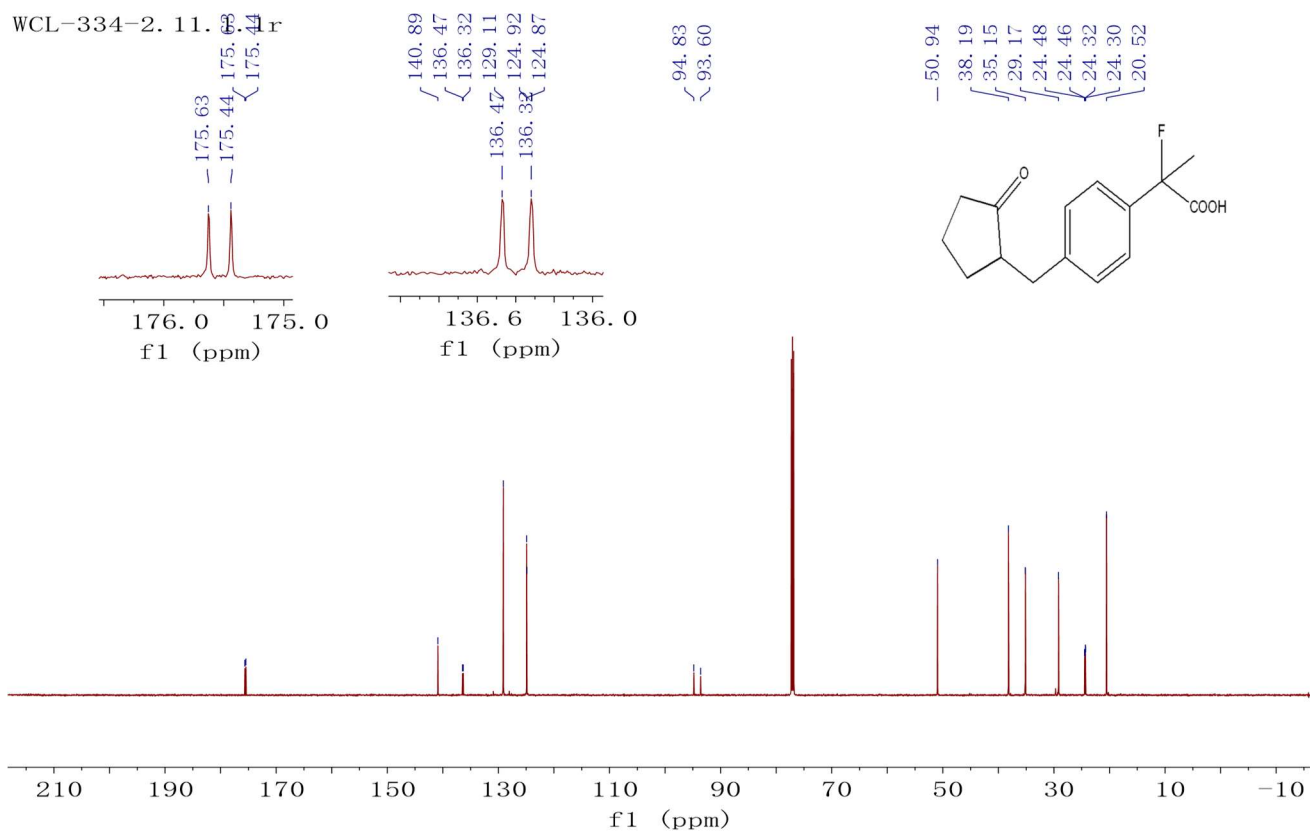

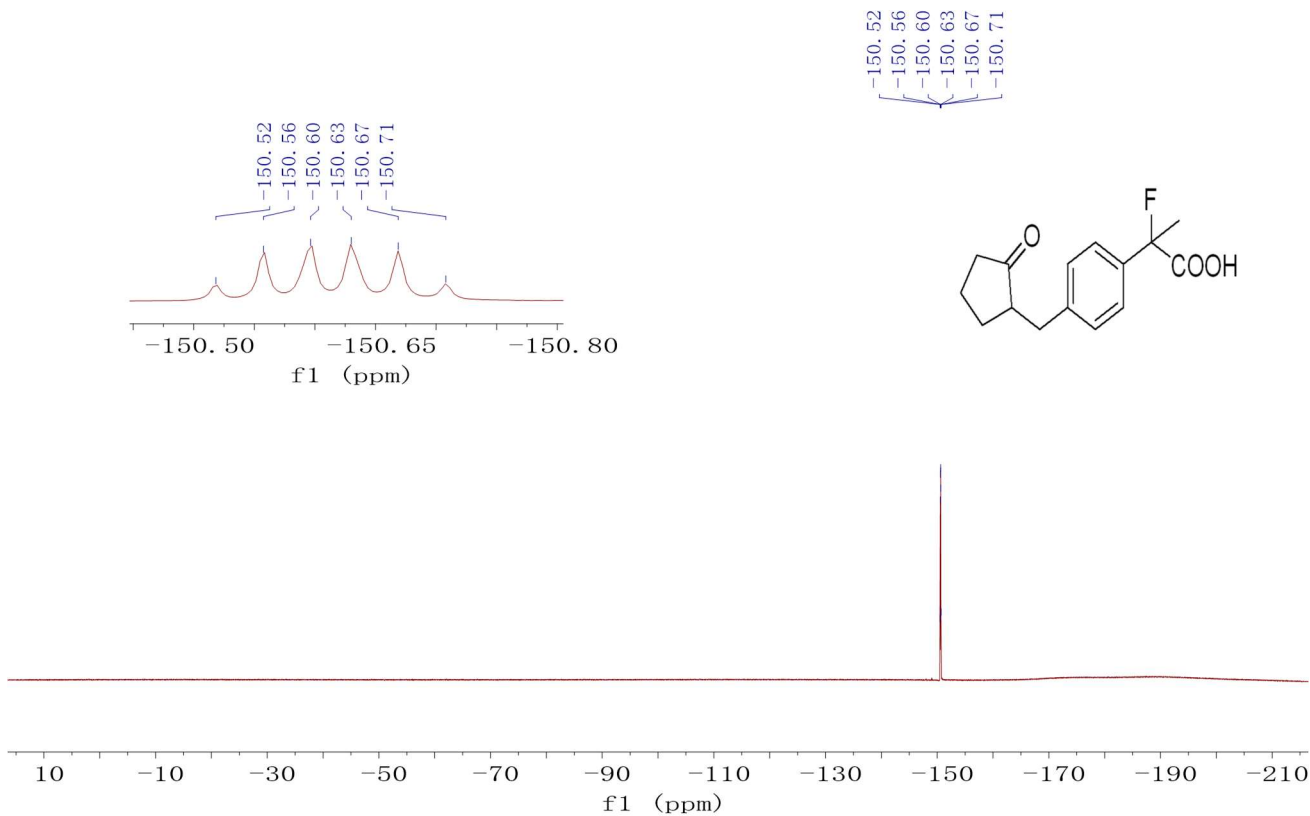

### Compound 35

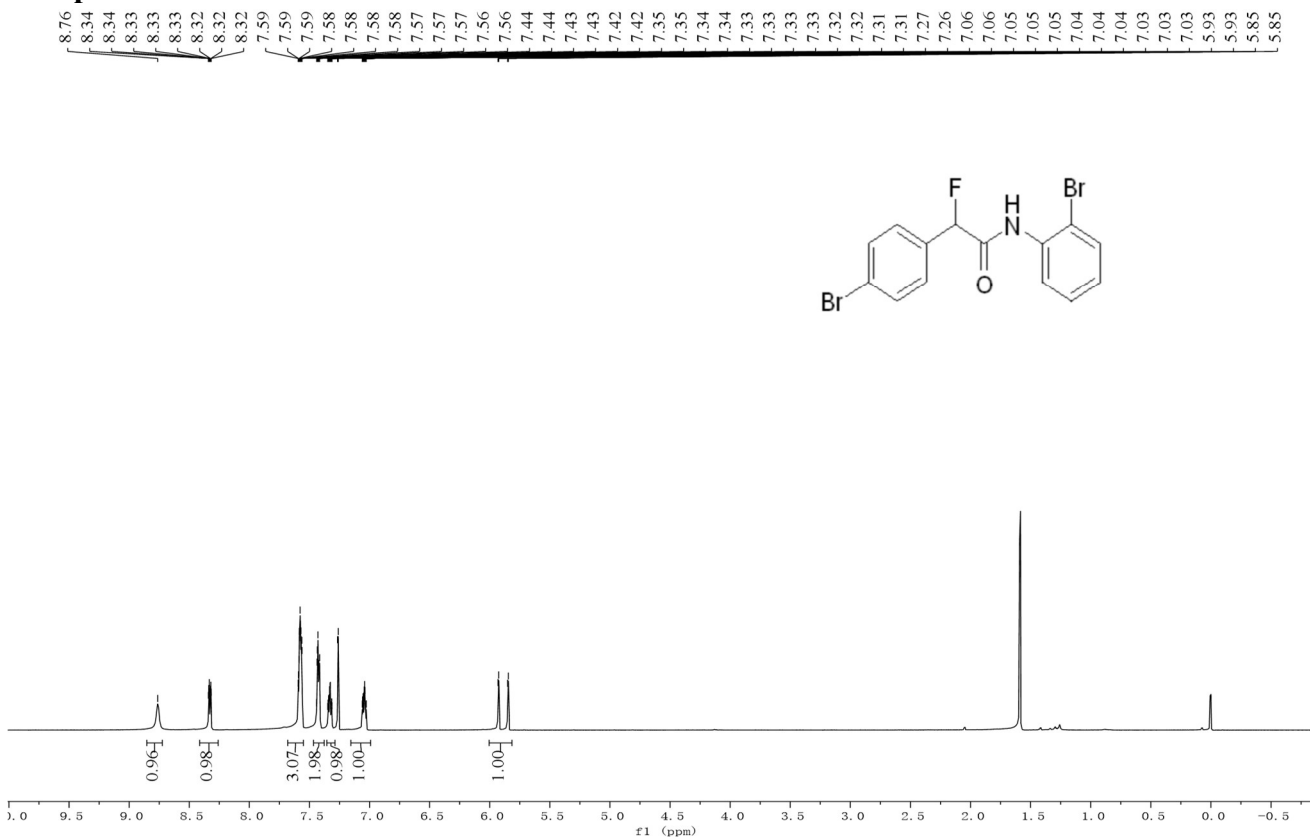

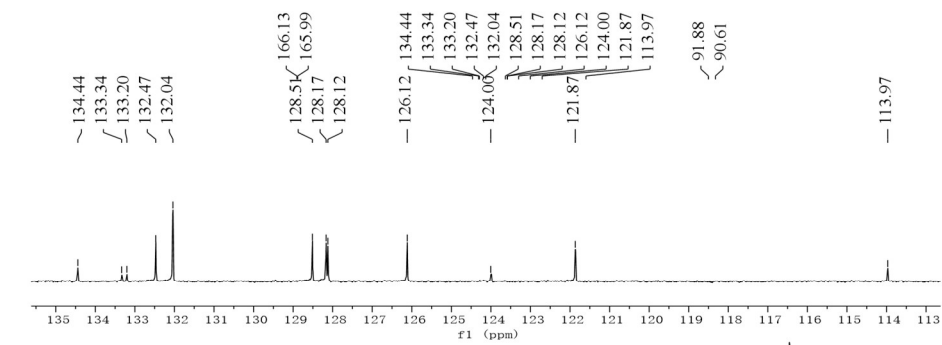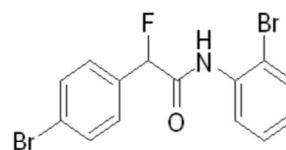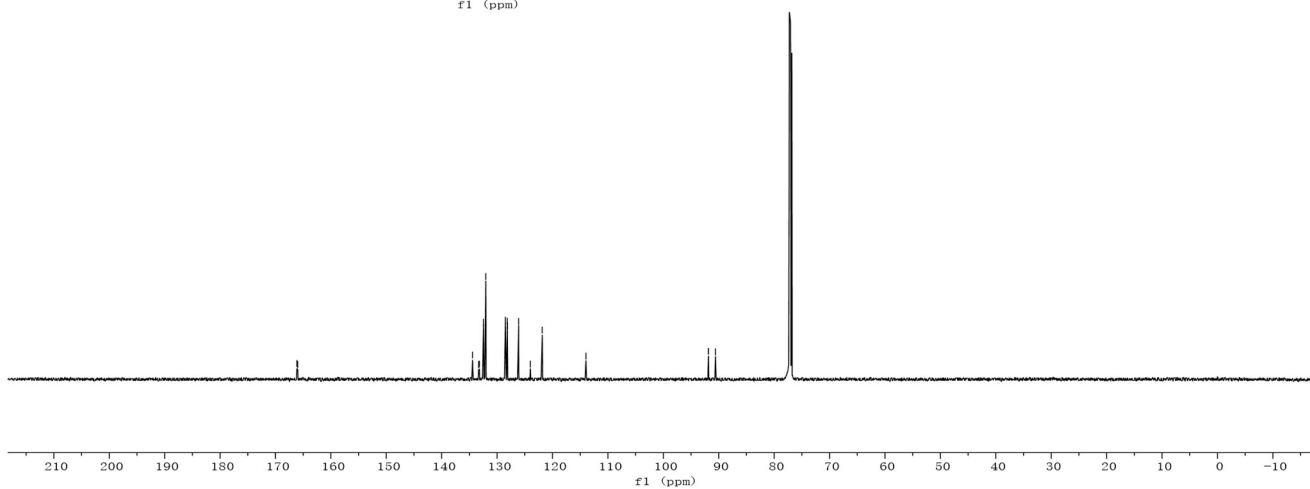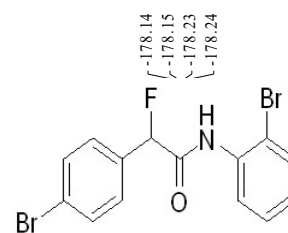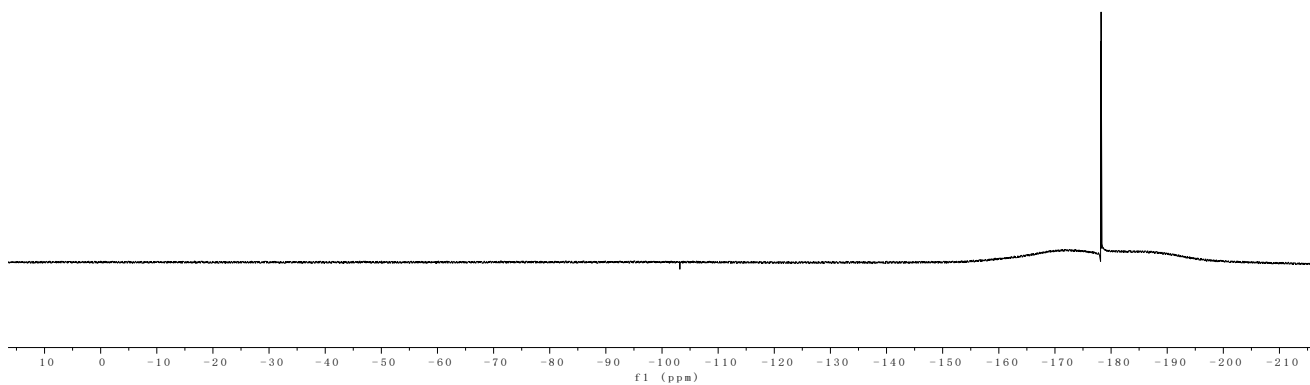

# Compound 36

WCL-323. 10.

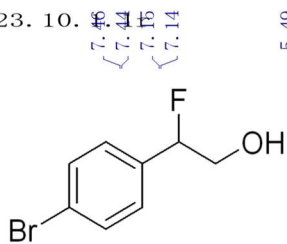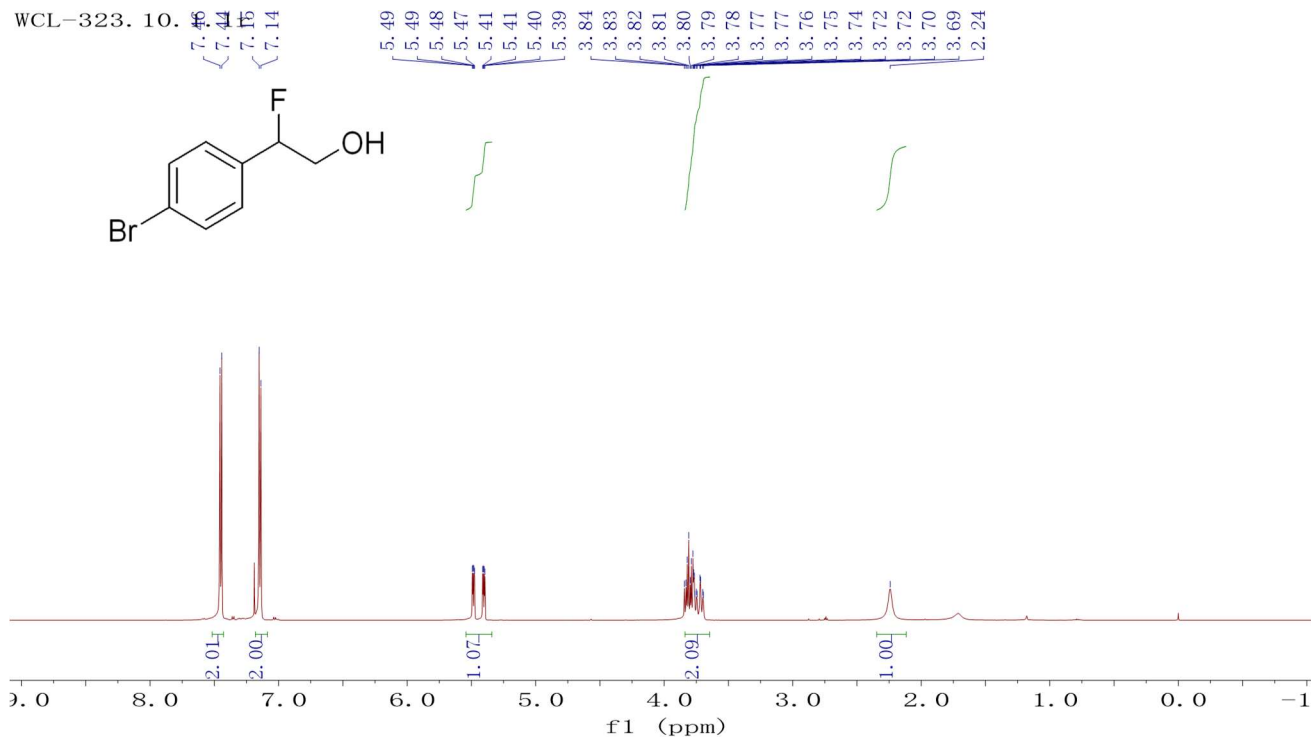

WCL-323. 12. 1. 1r

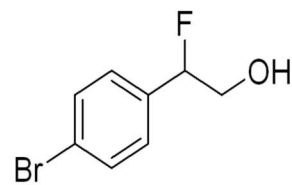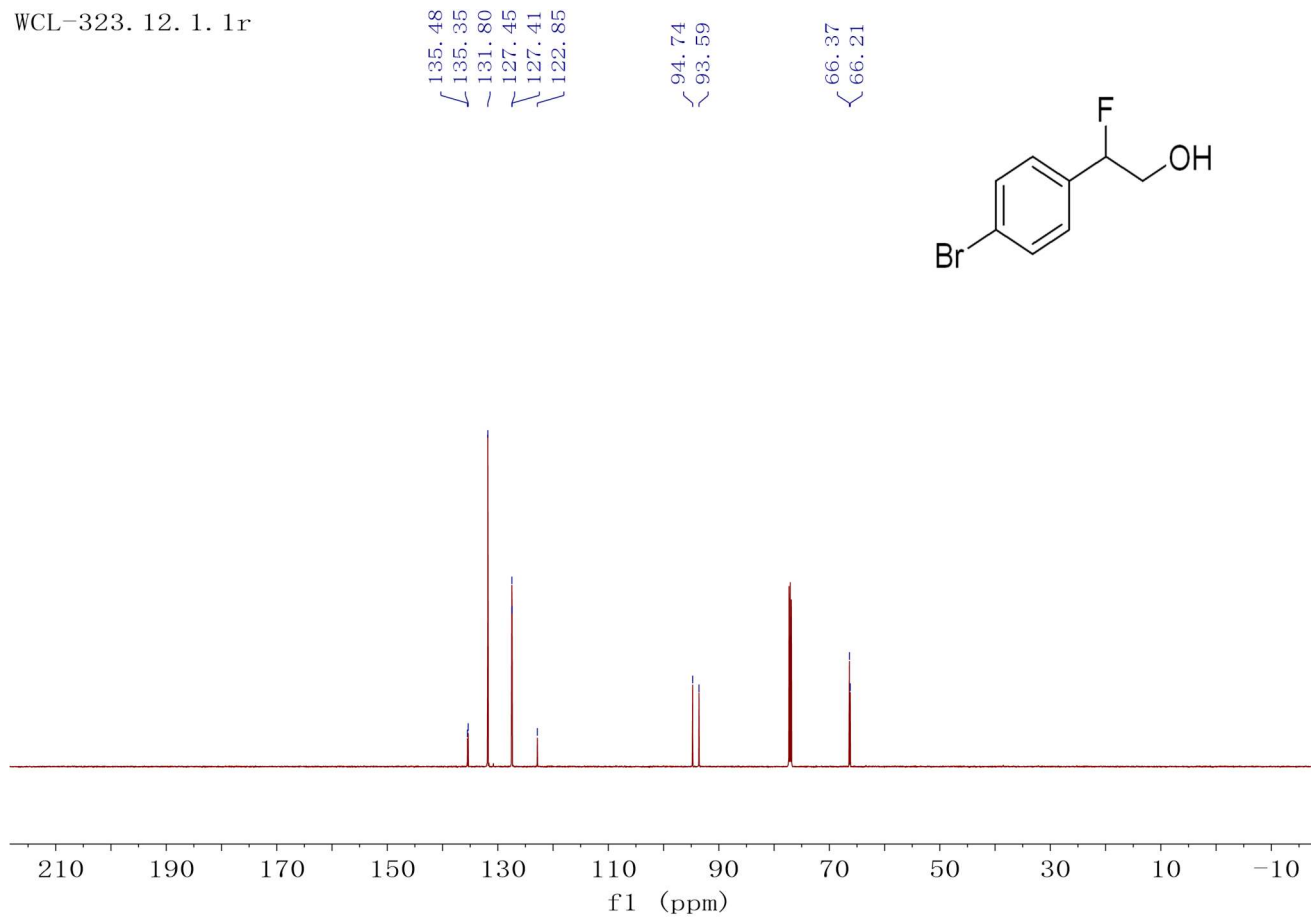

WCL-323. 11. 1. 1r

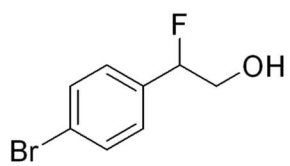

-187.39  
-187.43  
-187.44  
-187.48  
-187.51  
-187.53  
-187.56

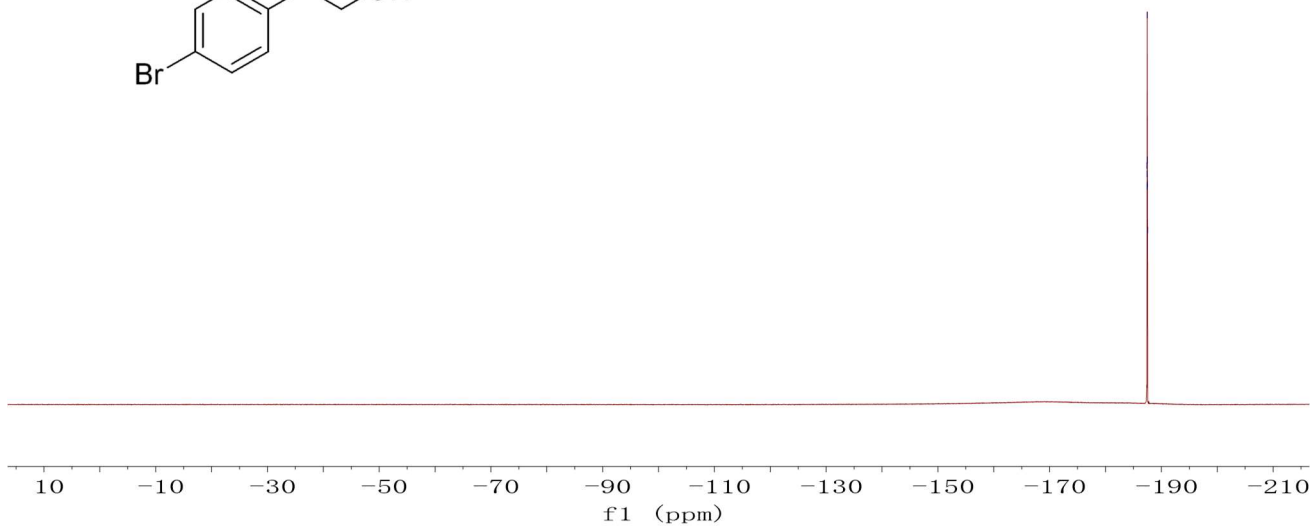

Supplement: d1qo01814k1.pdf [file d1qo01814k1.pdf]
